# Supplementary material for: A novel approach to study the morphology and chemistry of pollen in a phylogenetic context, applied to the halophytic taxon Nitraria L.(Nitrariaceae)
Source: PeerJ journal article supplement (doi:10.7717/peerj.5055), 2018-07-19

### Apocolpium distance <

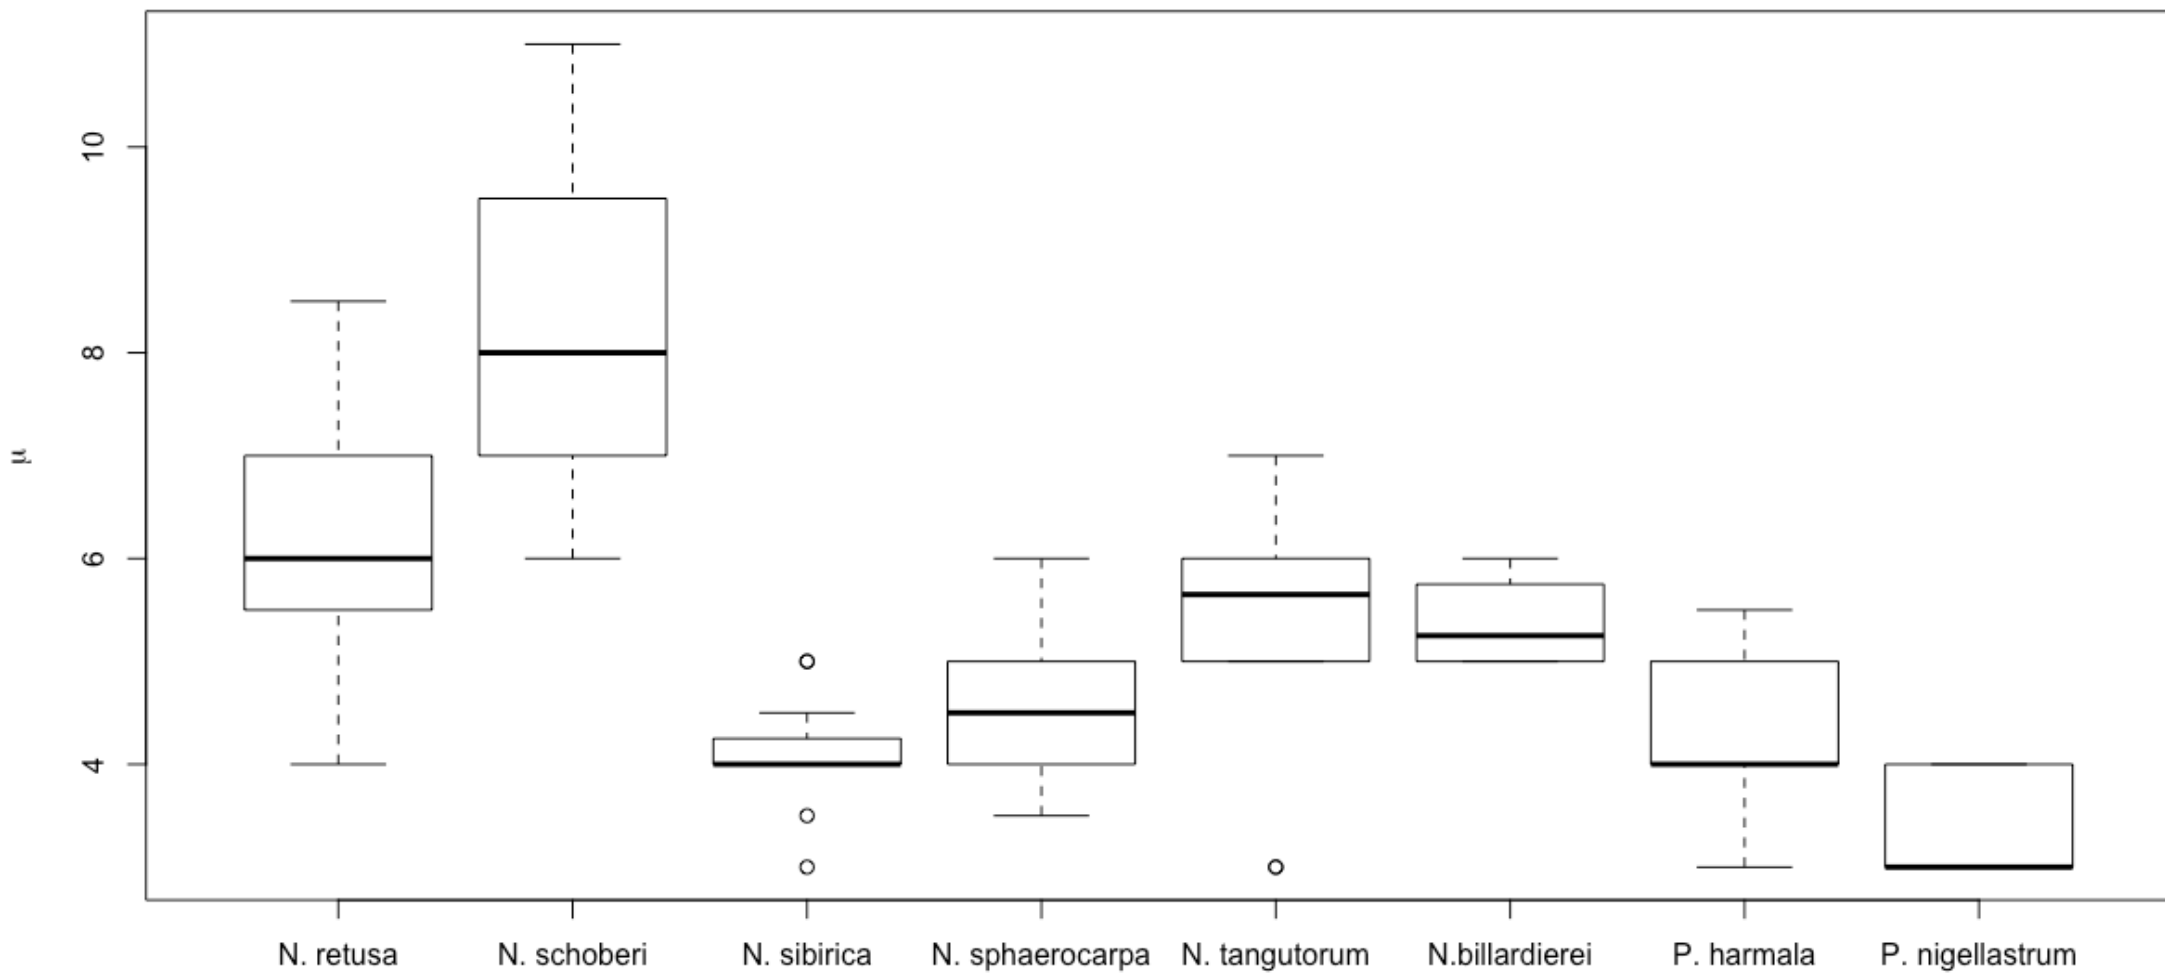

### Apocolpium distance >

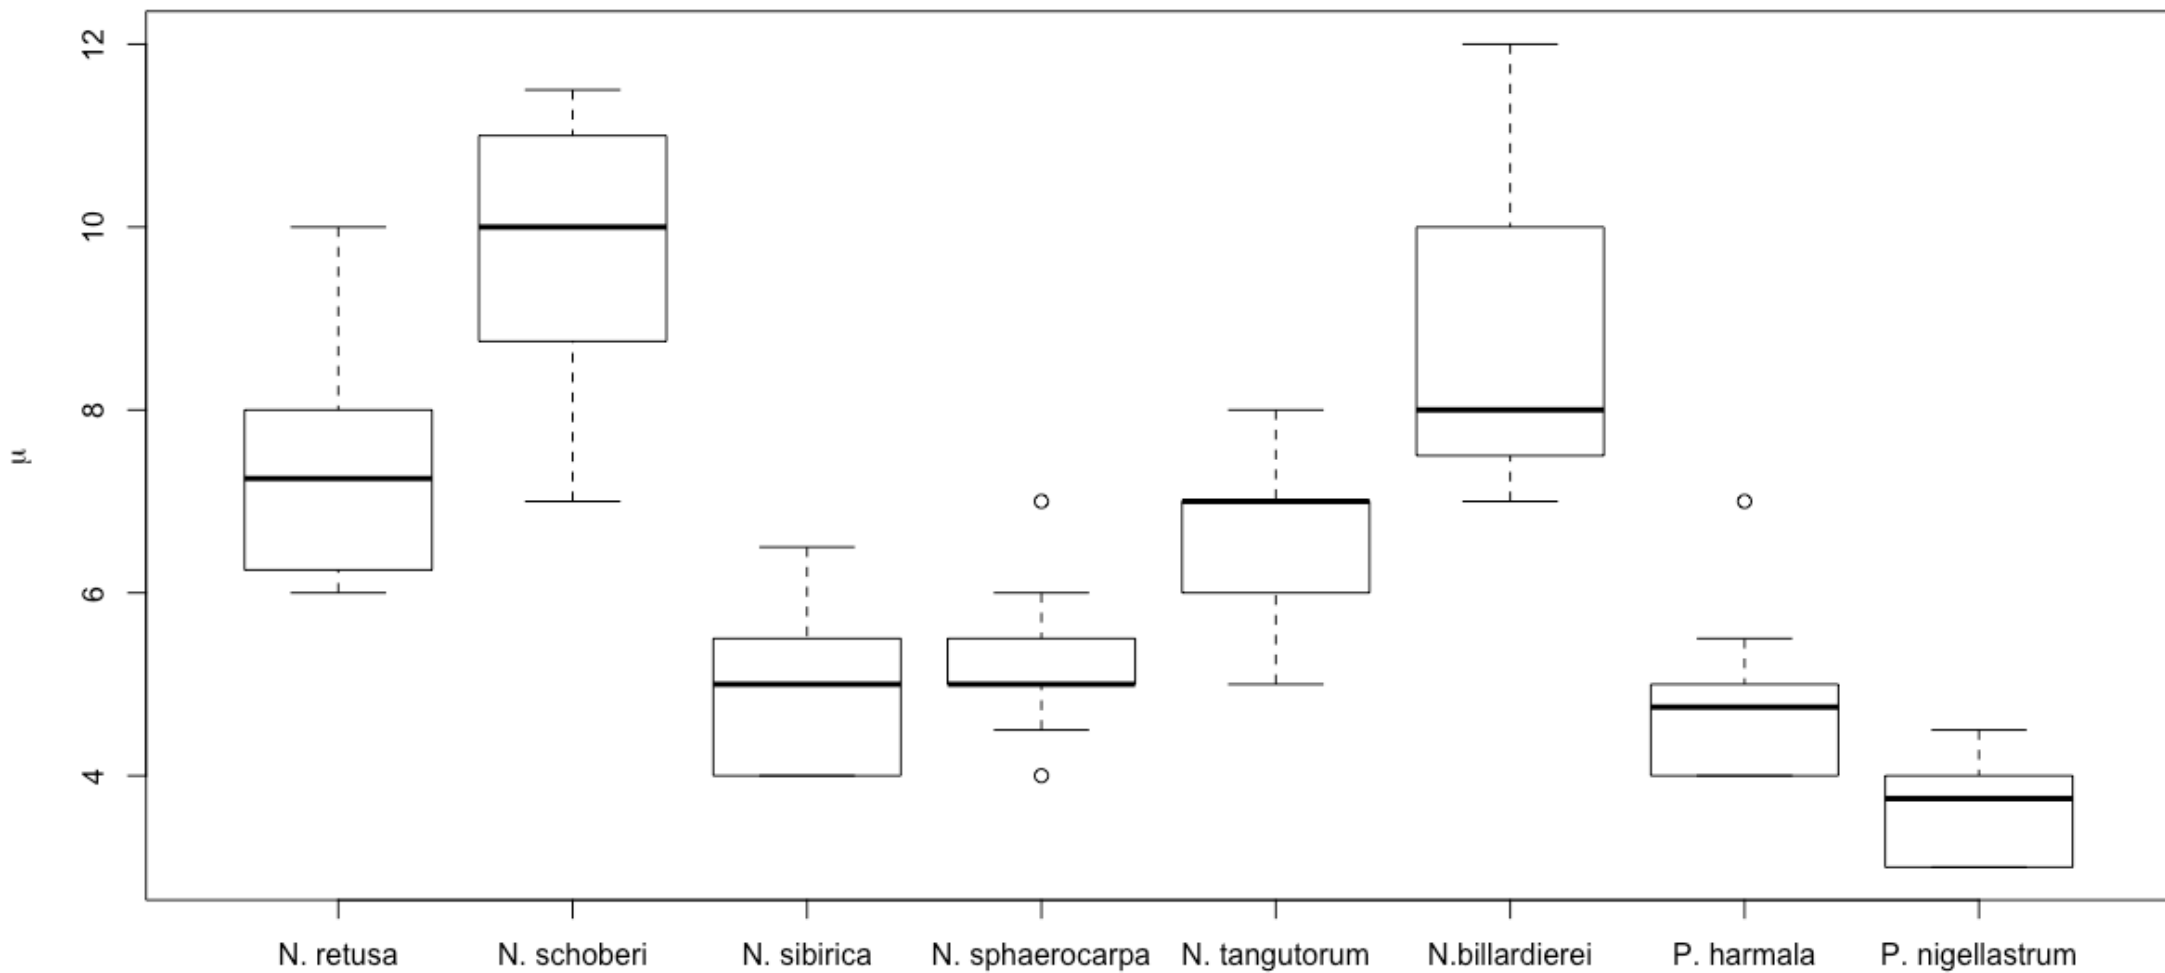

### Colpus length

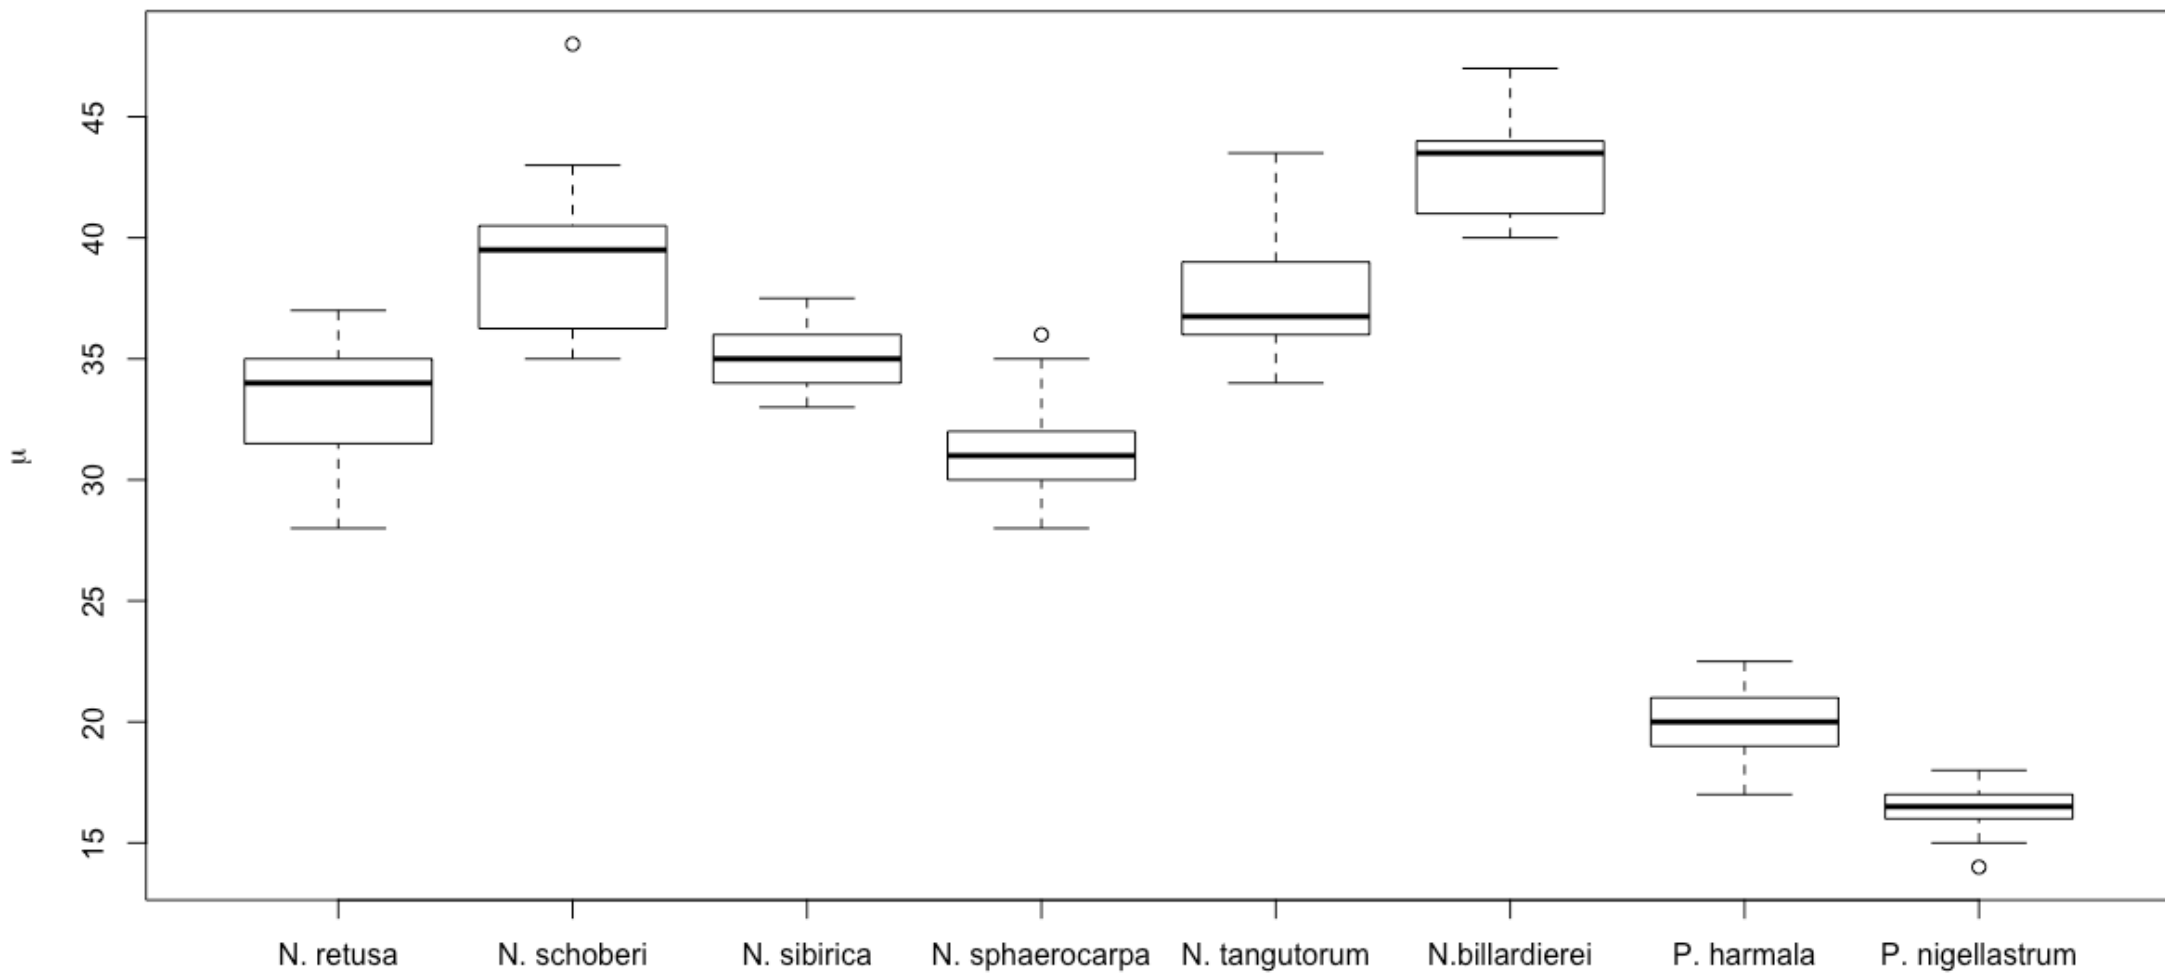

### Colpus width

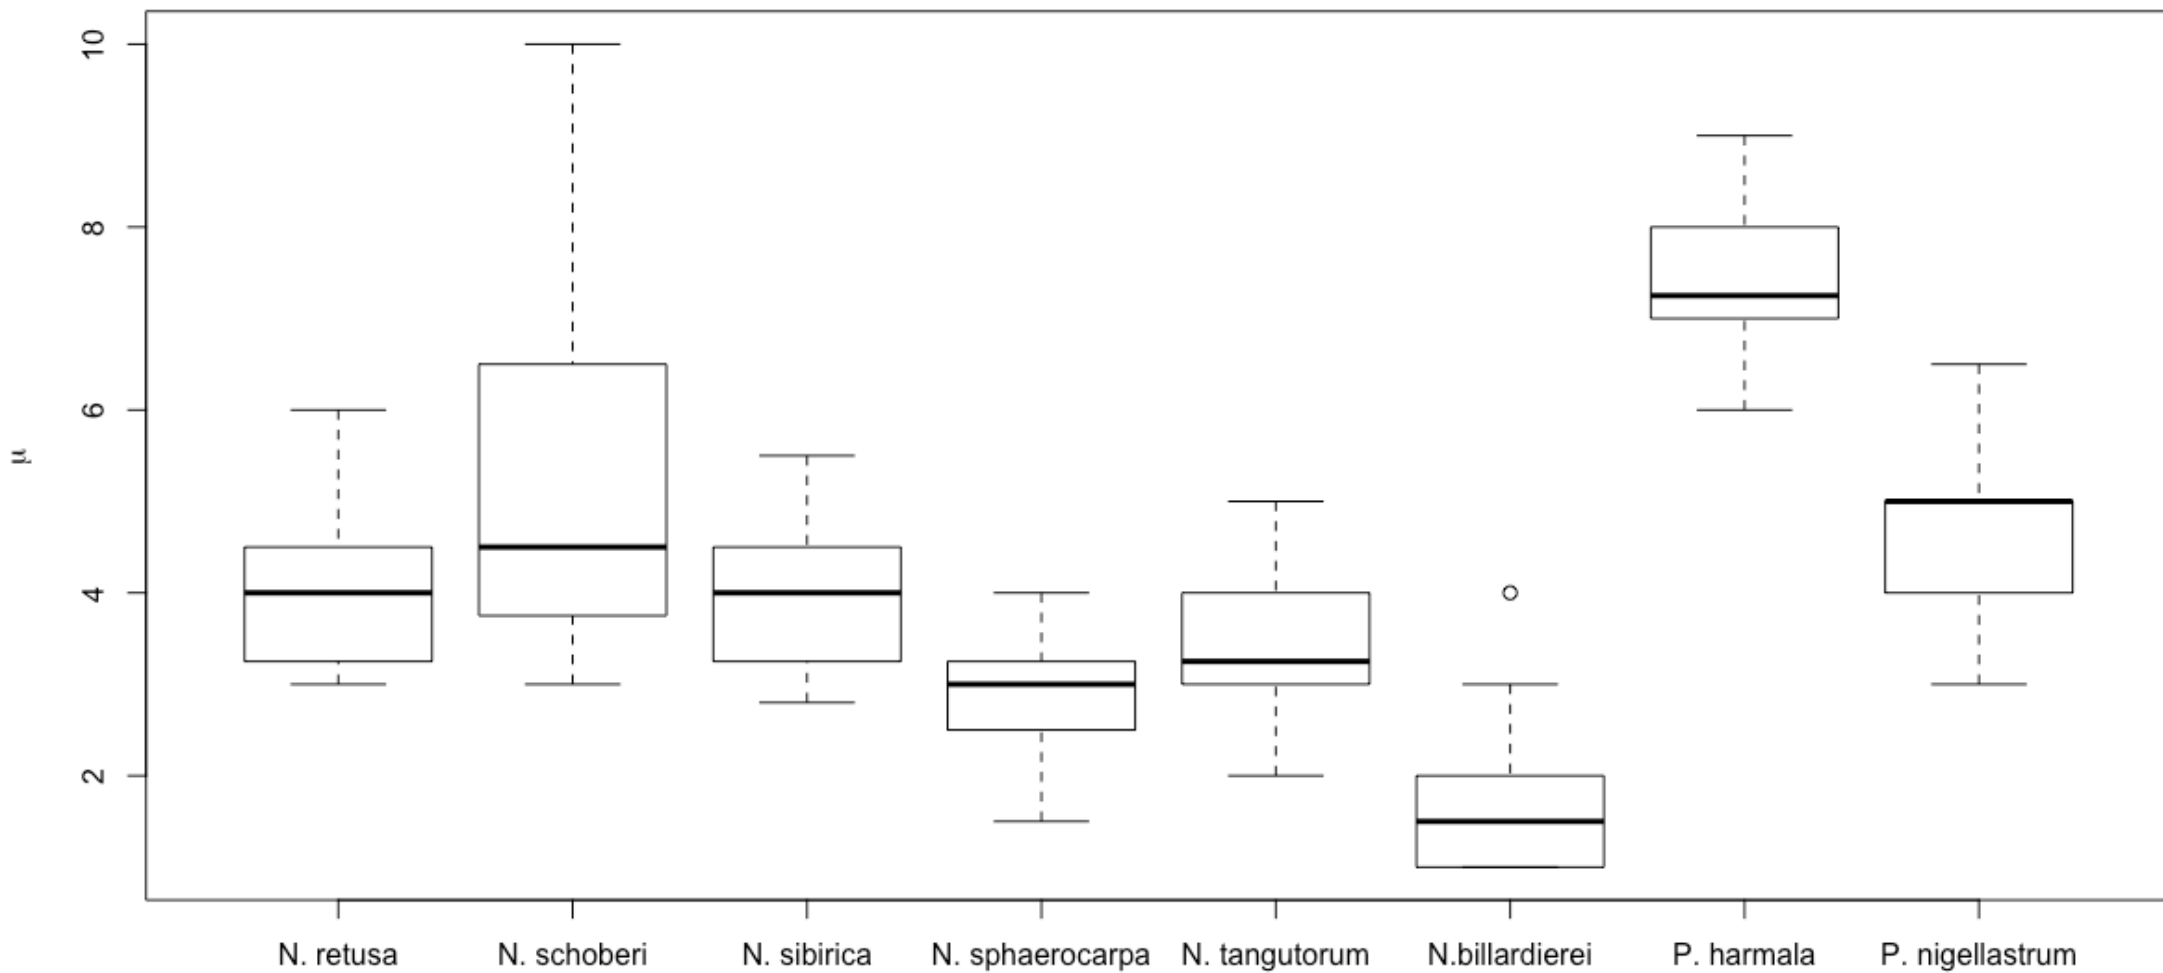

### Costa thickness

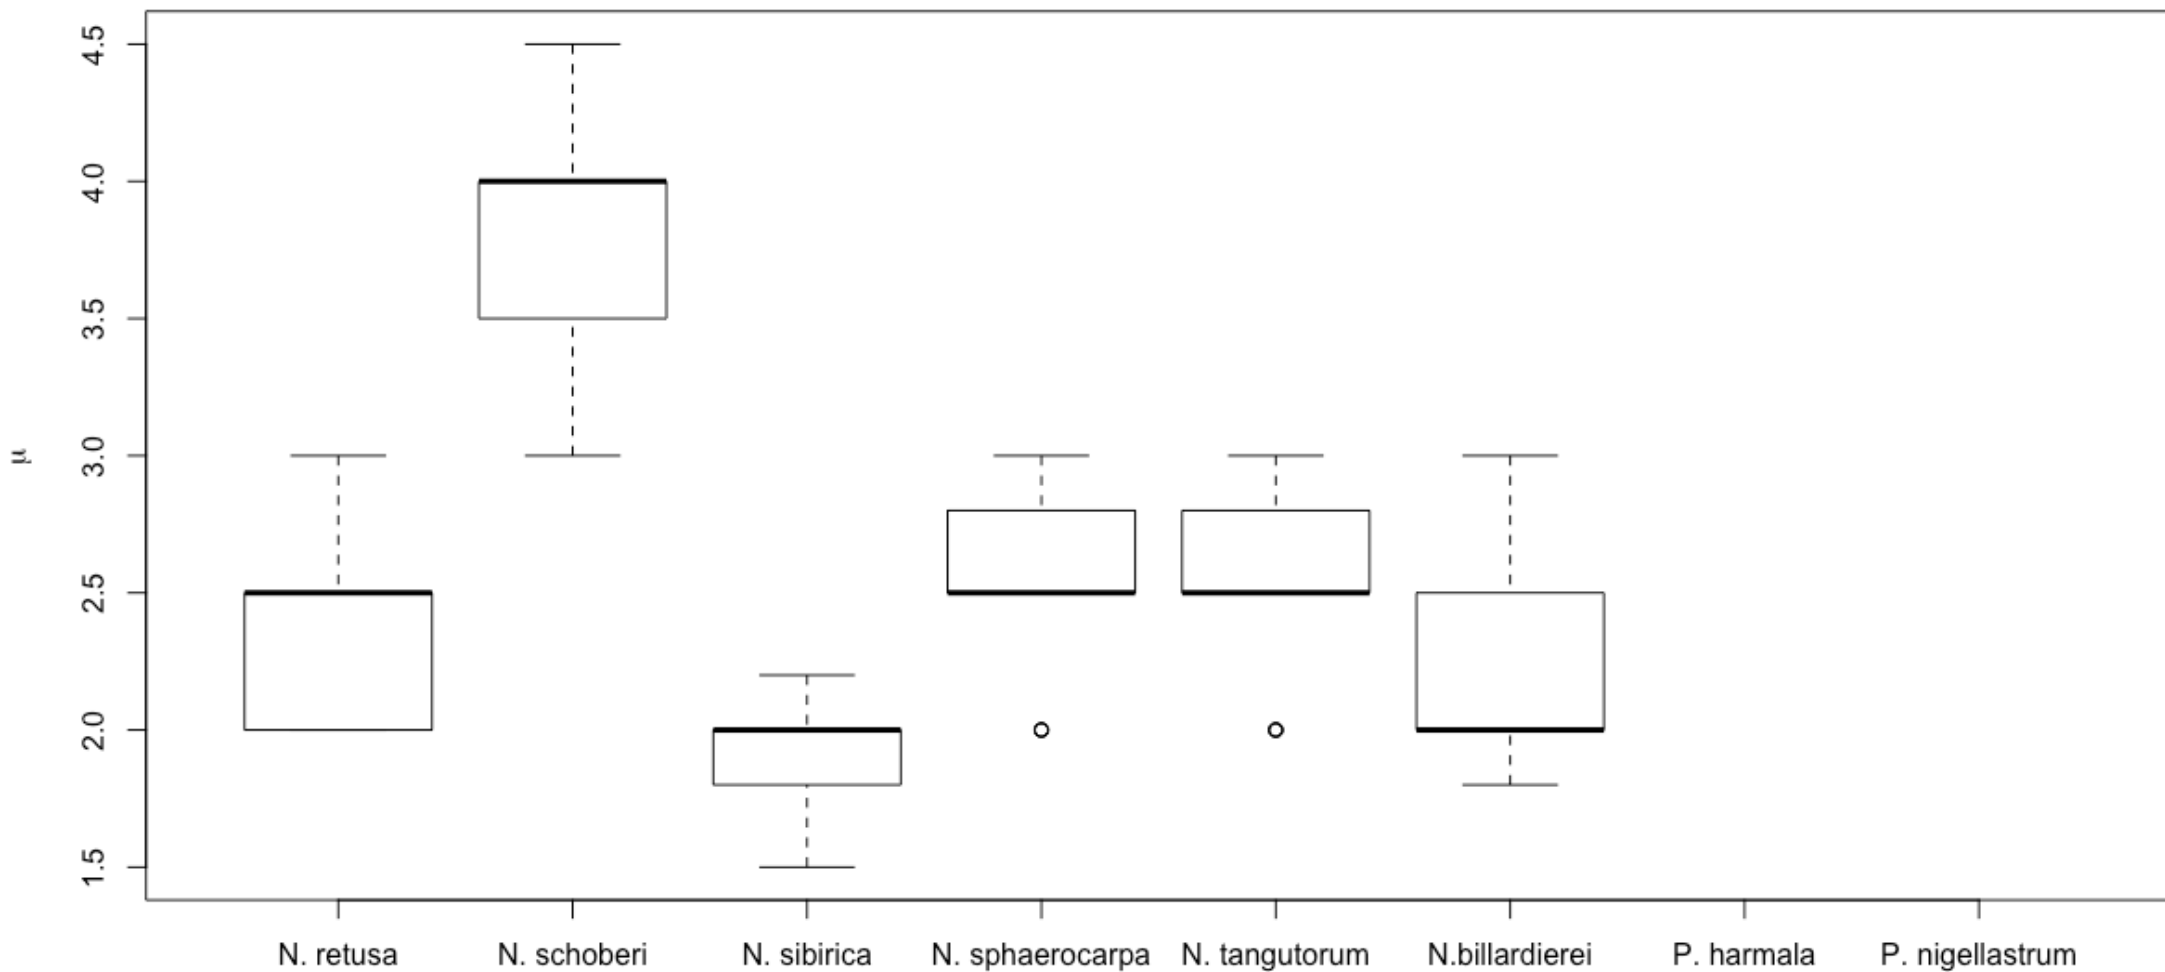

### Equatorial axis

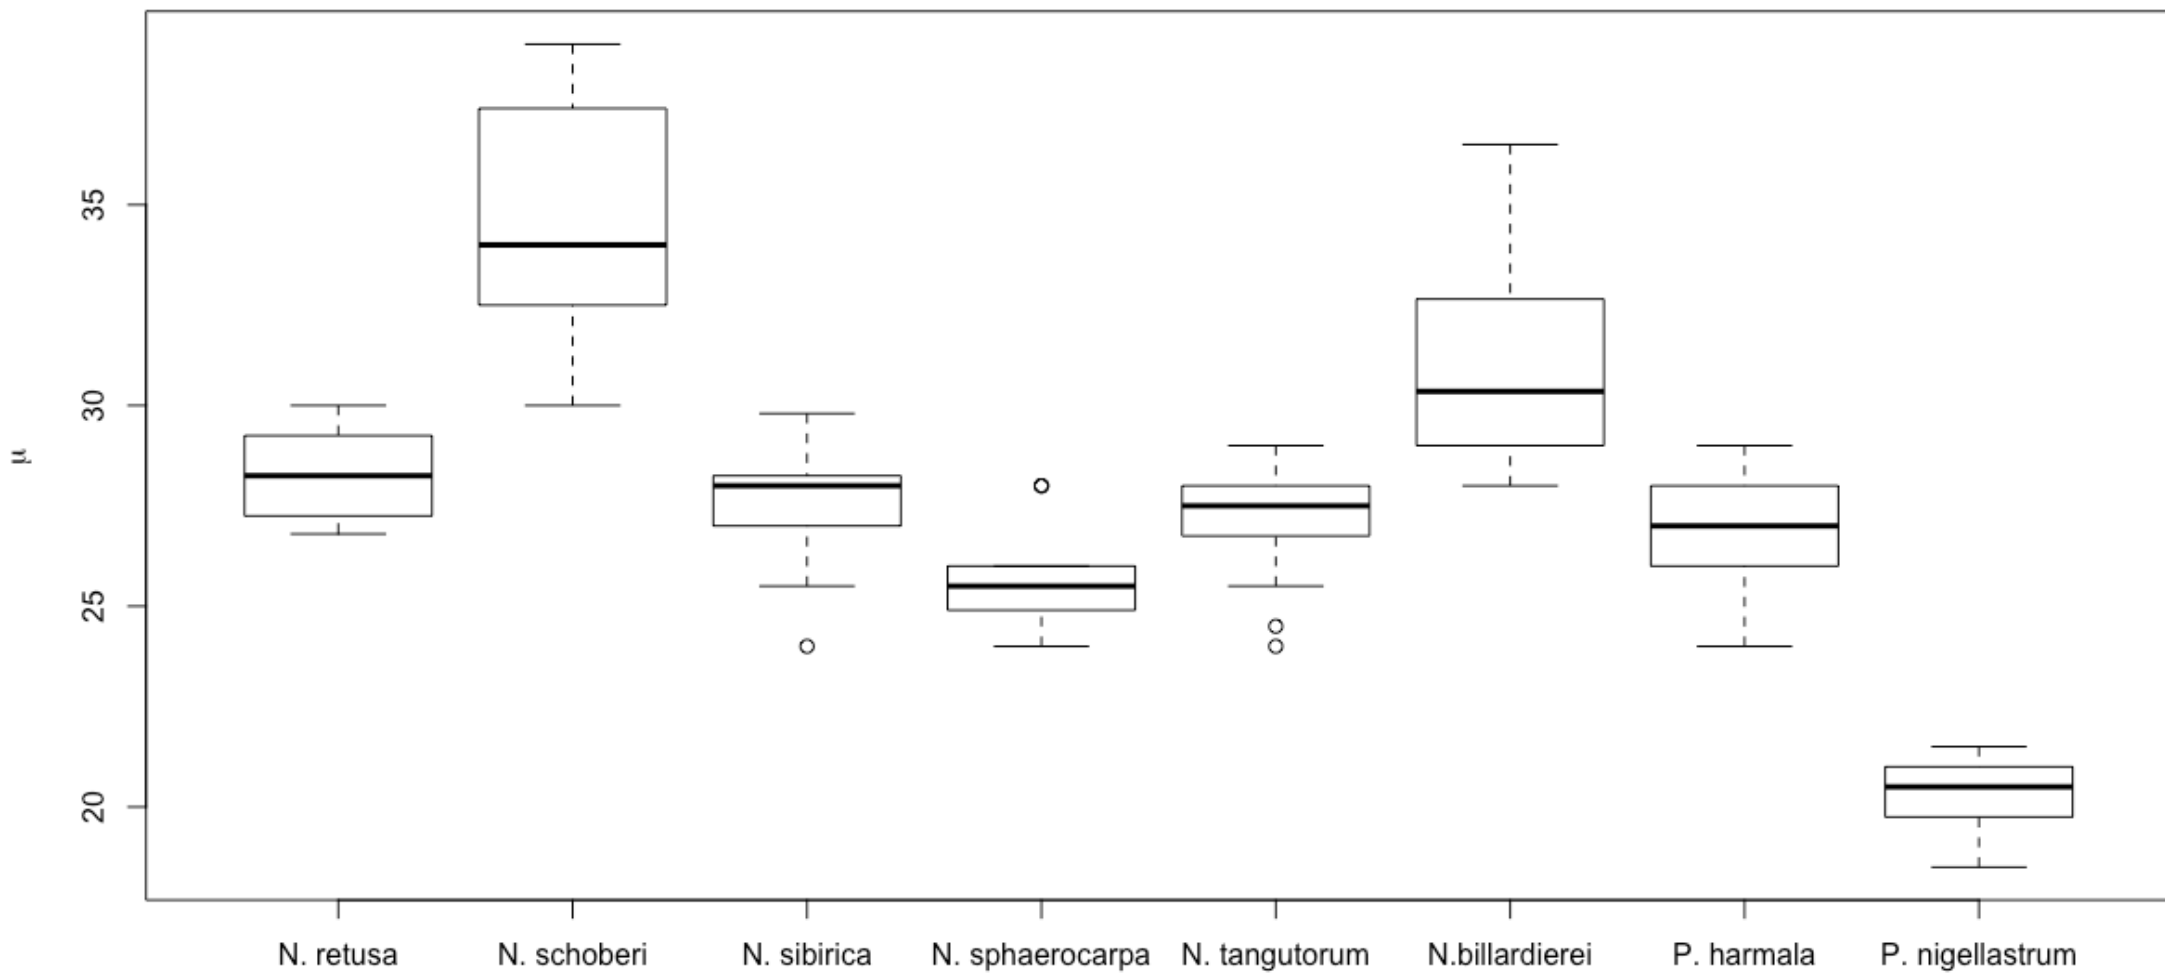

### Equatorial diameter

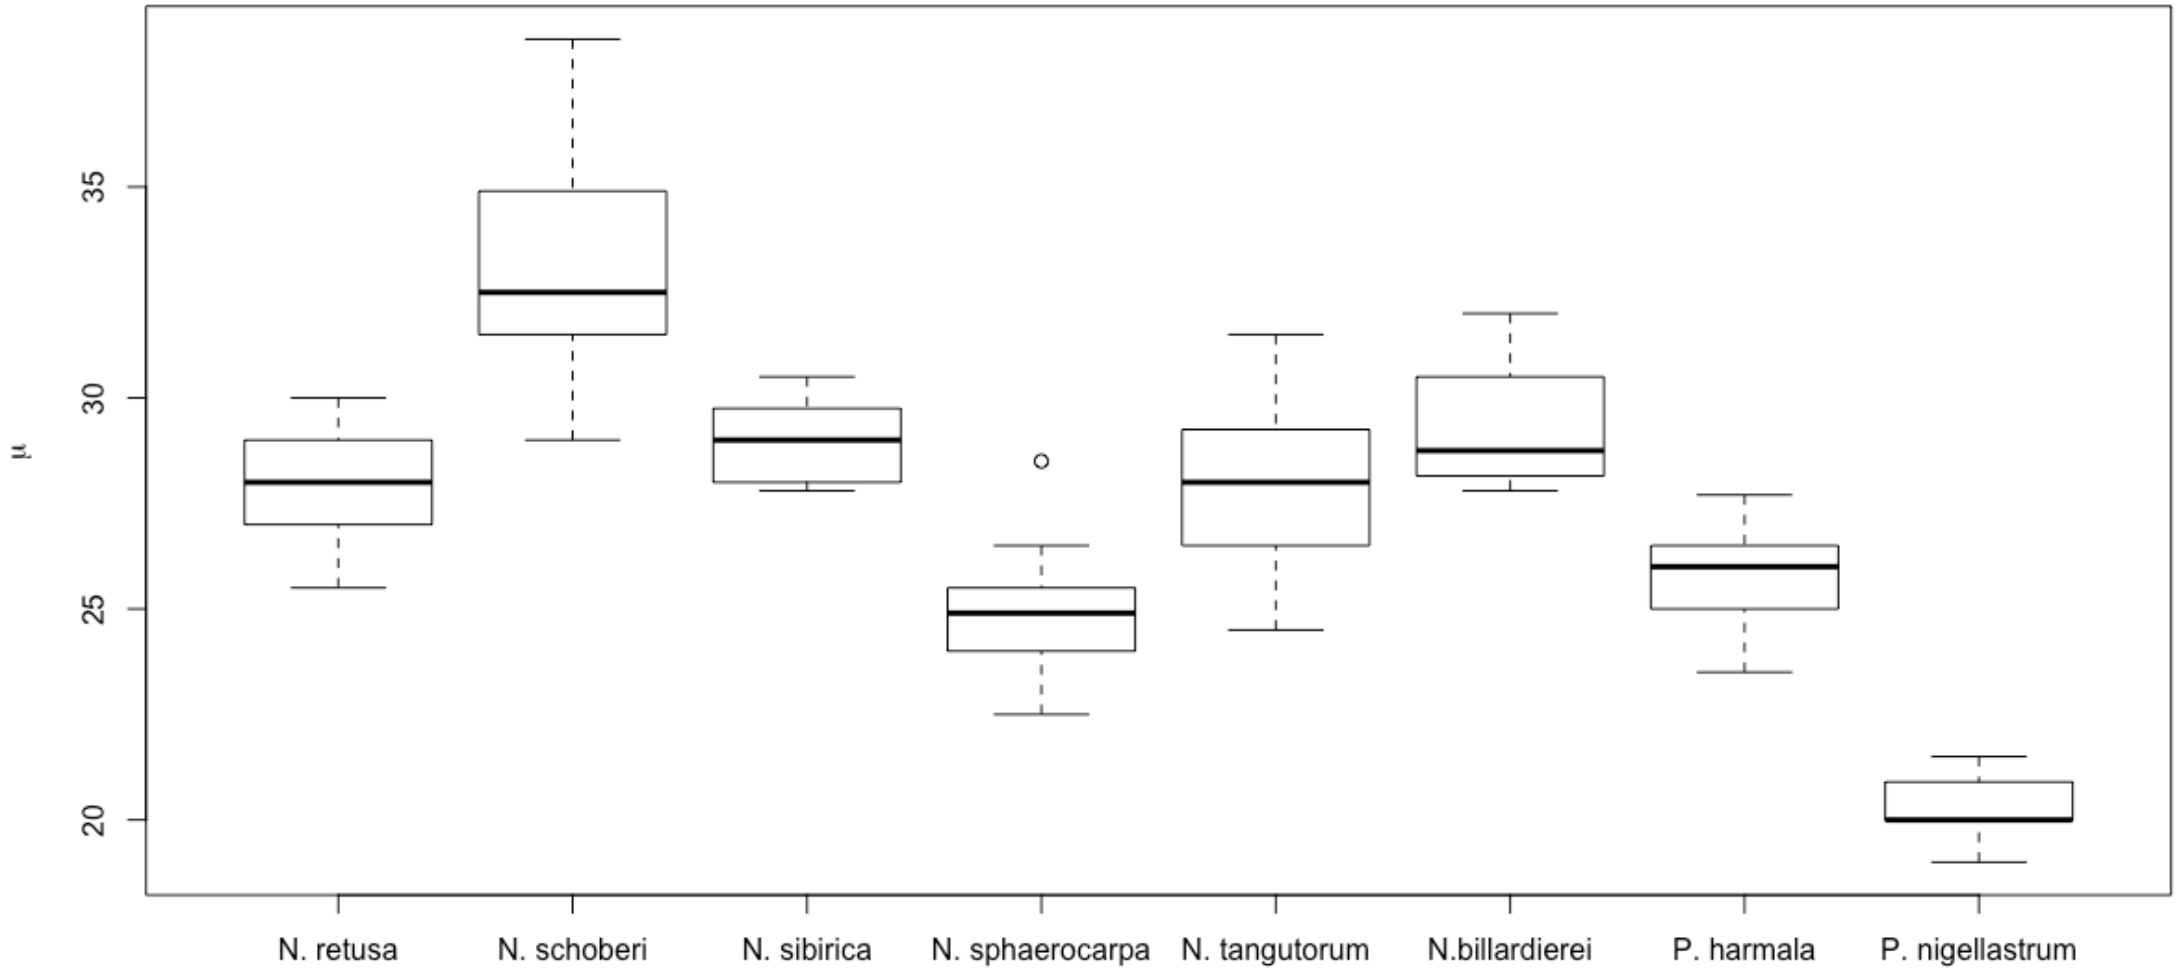

### Exine equatorial view

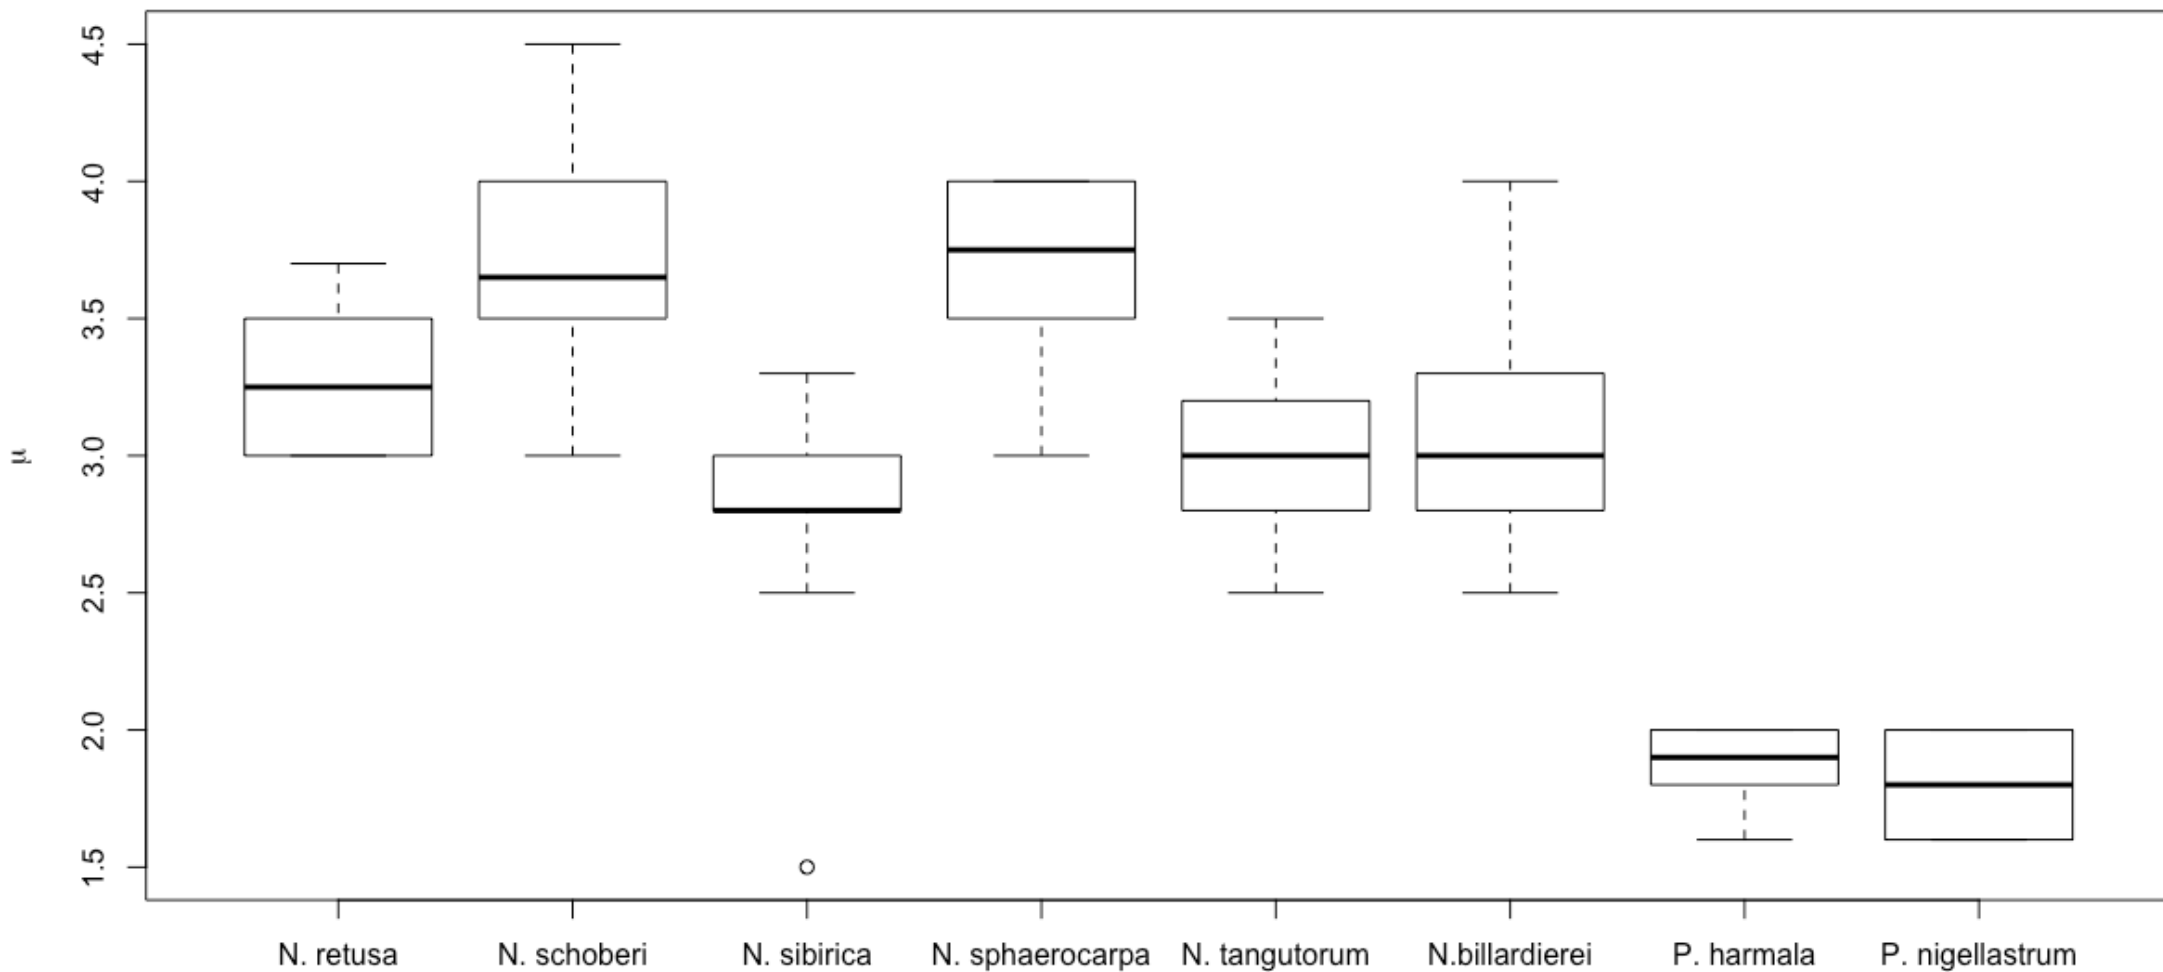



### Exine index

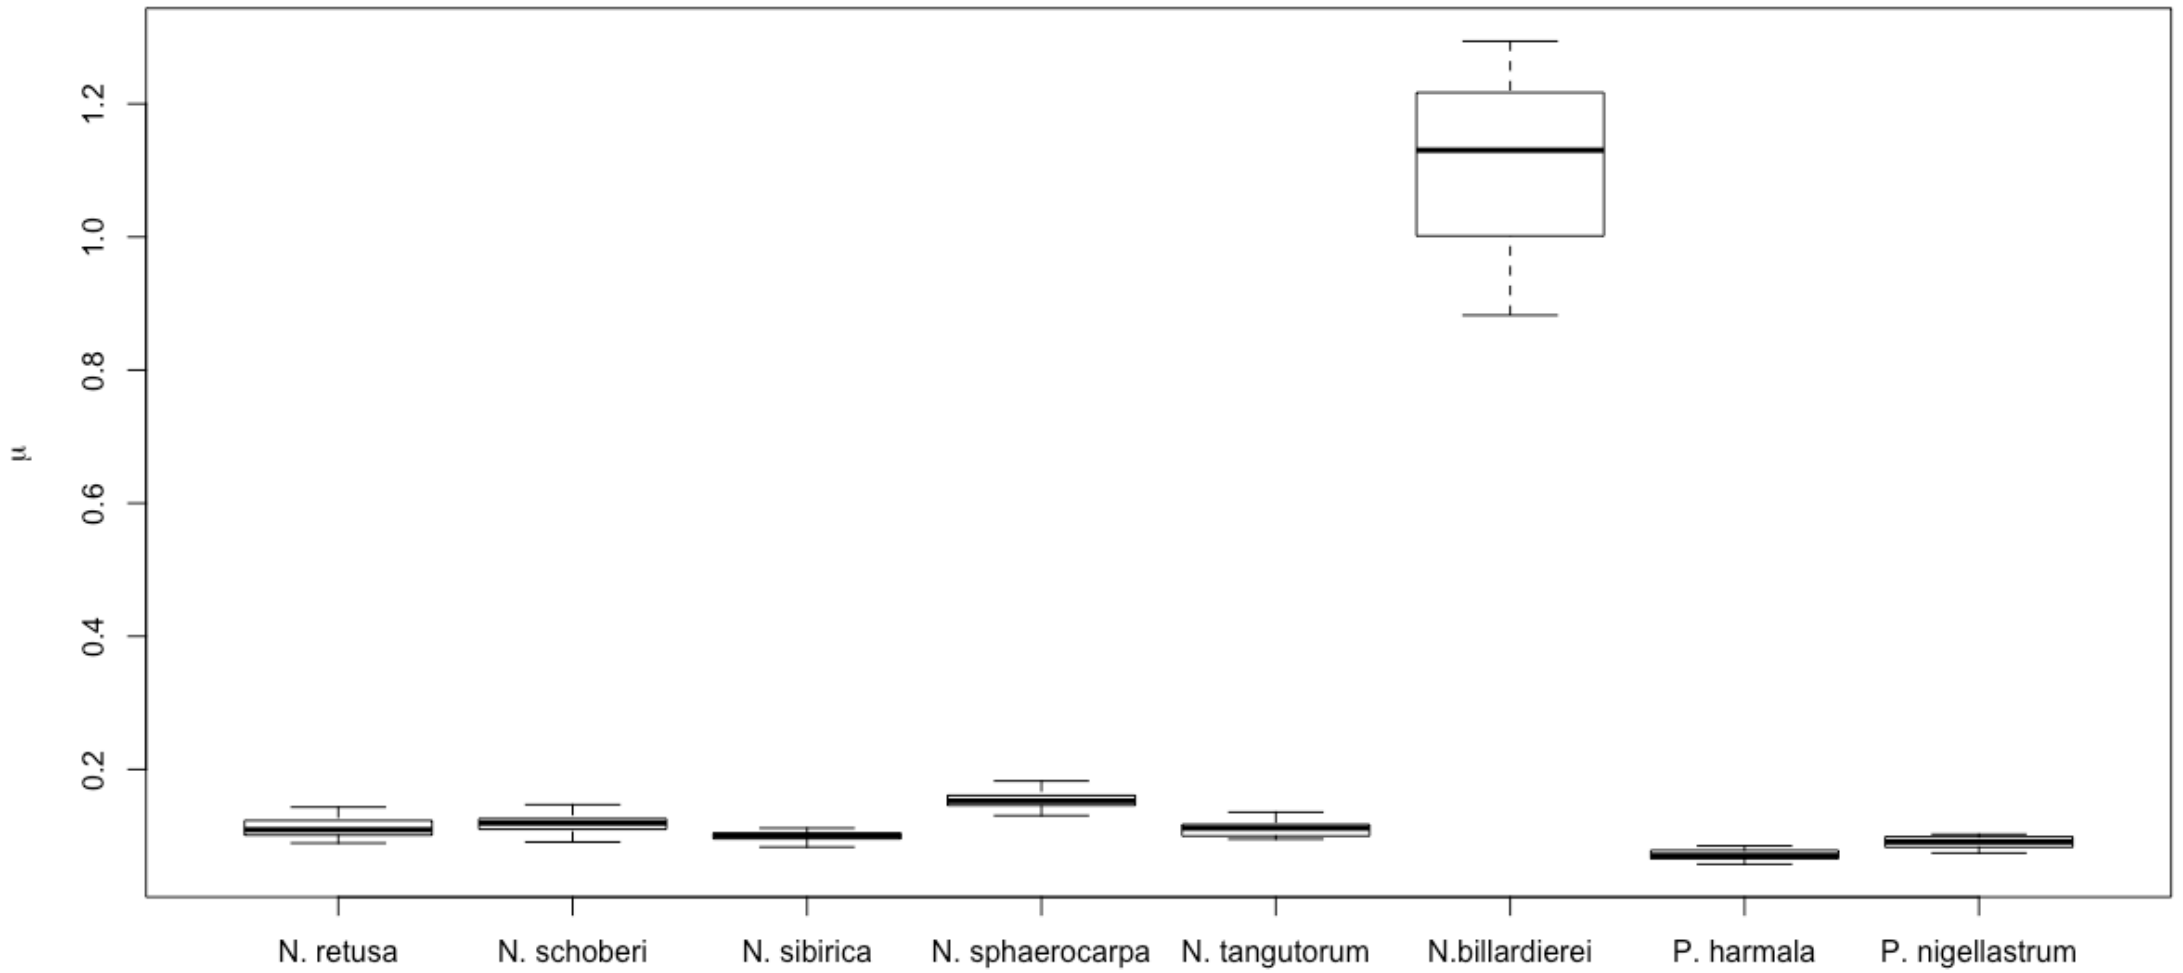

### Exine polar area equatorial view

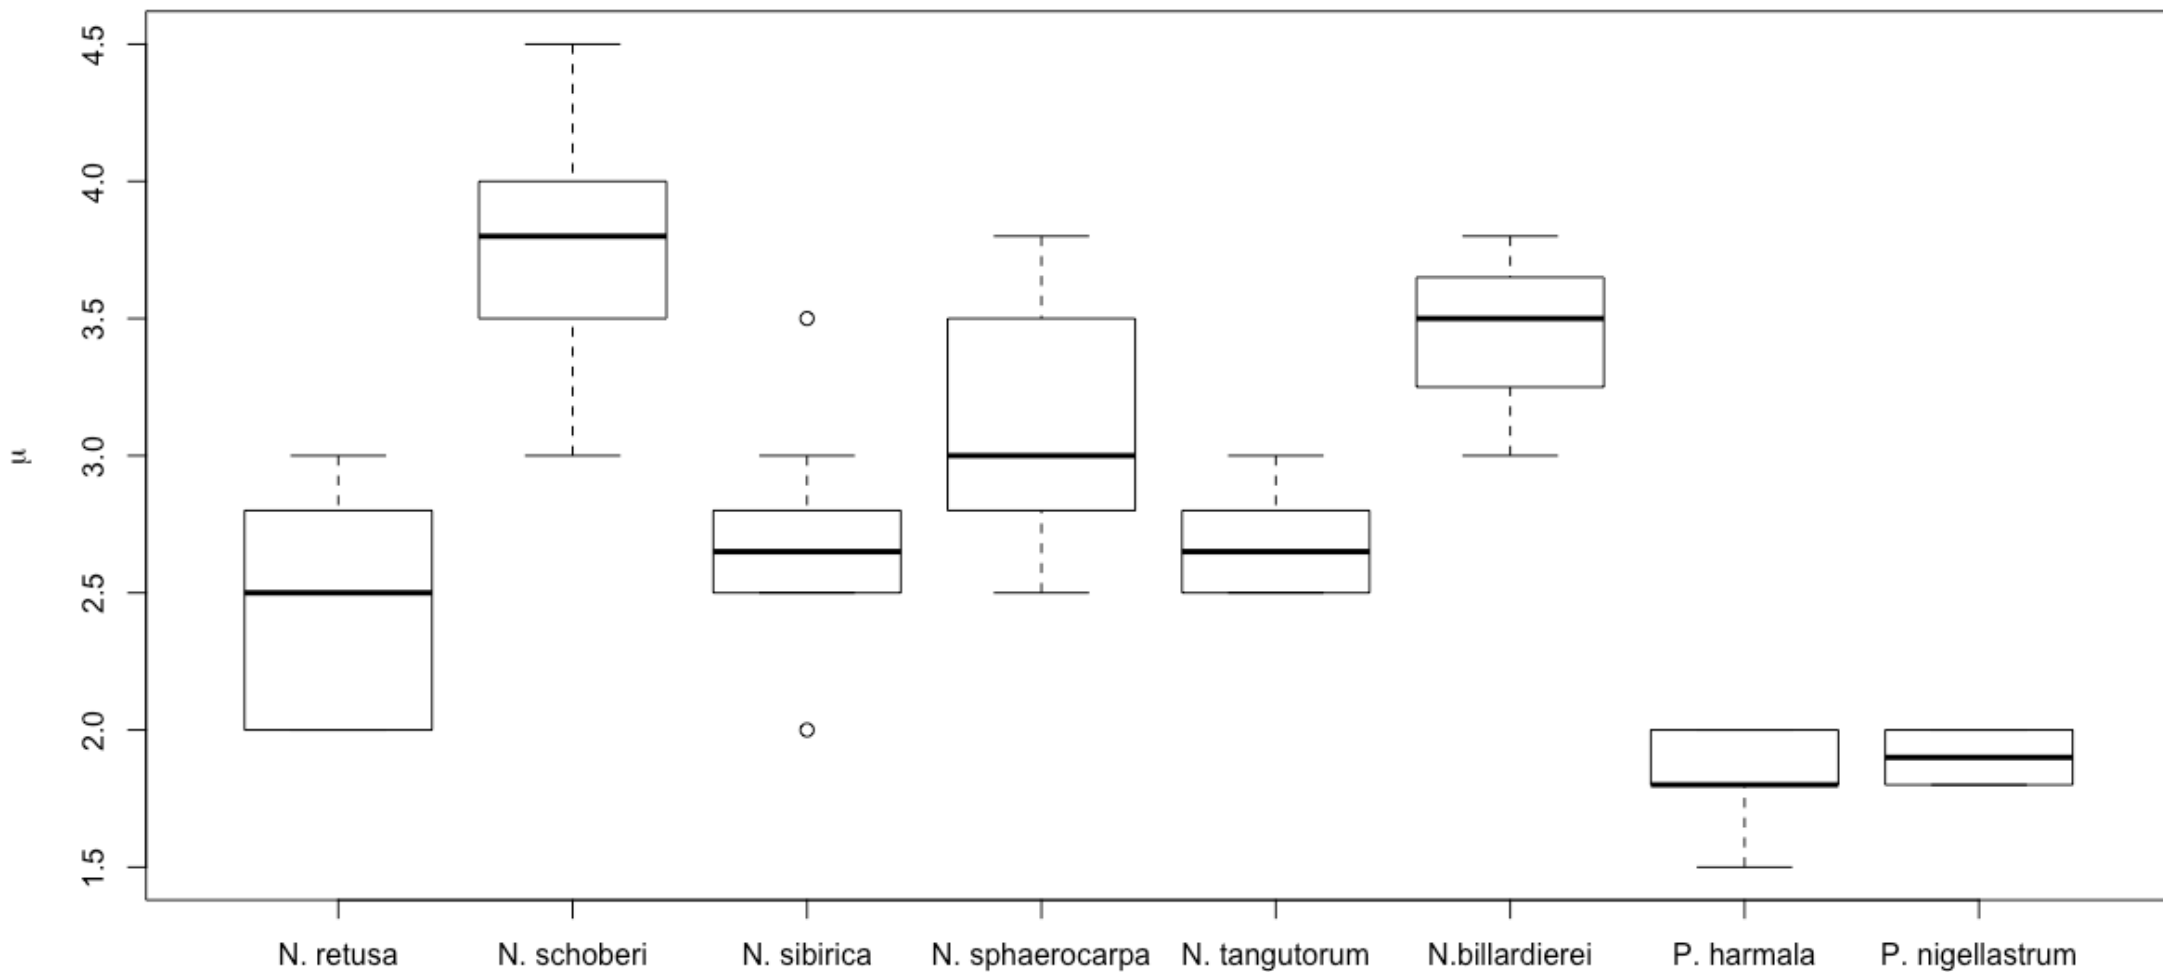

### Exine polar view

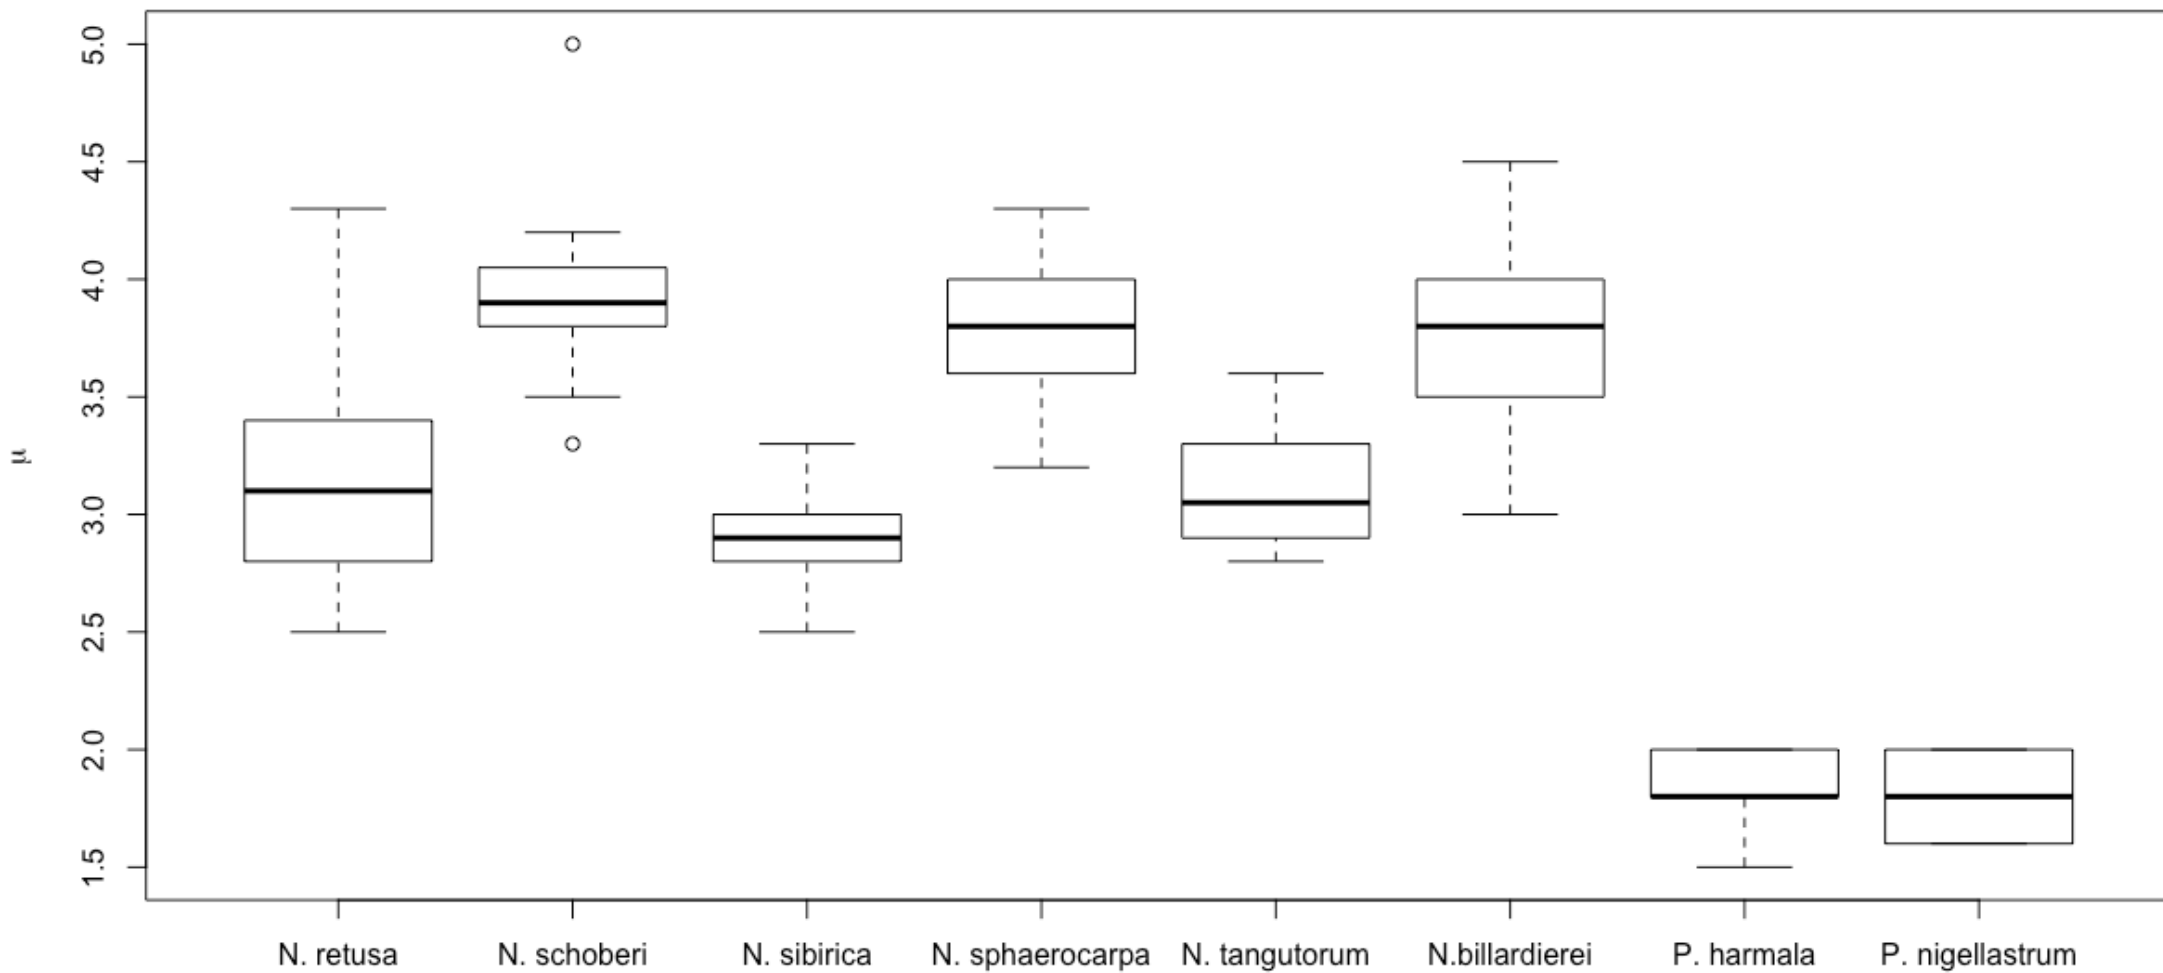

### Polar area index (P.A.I.)

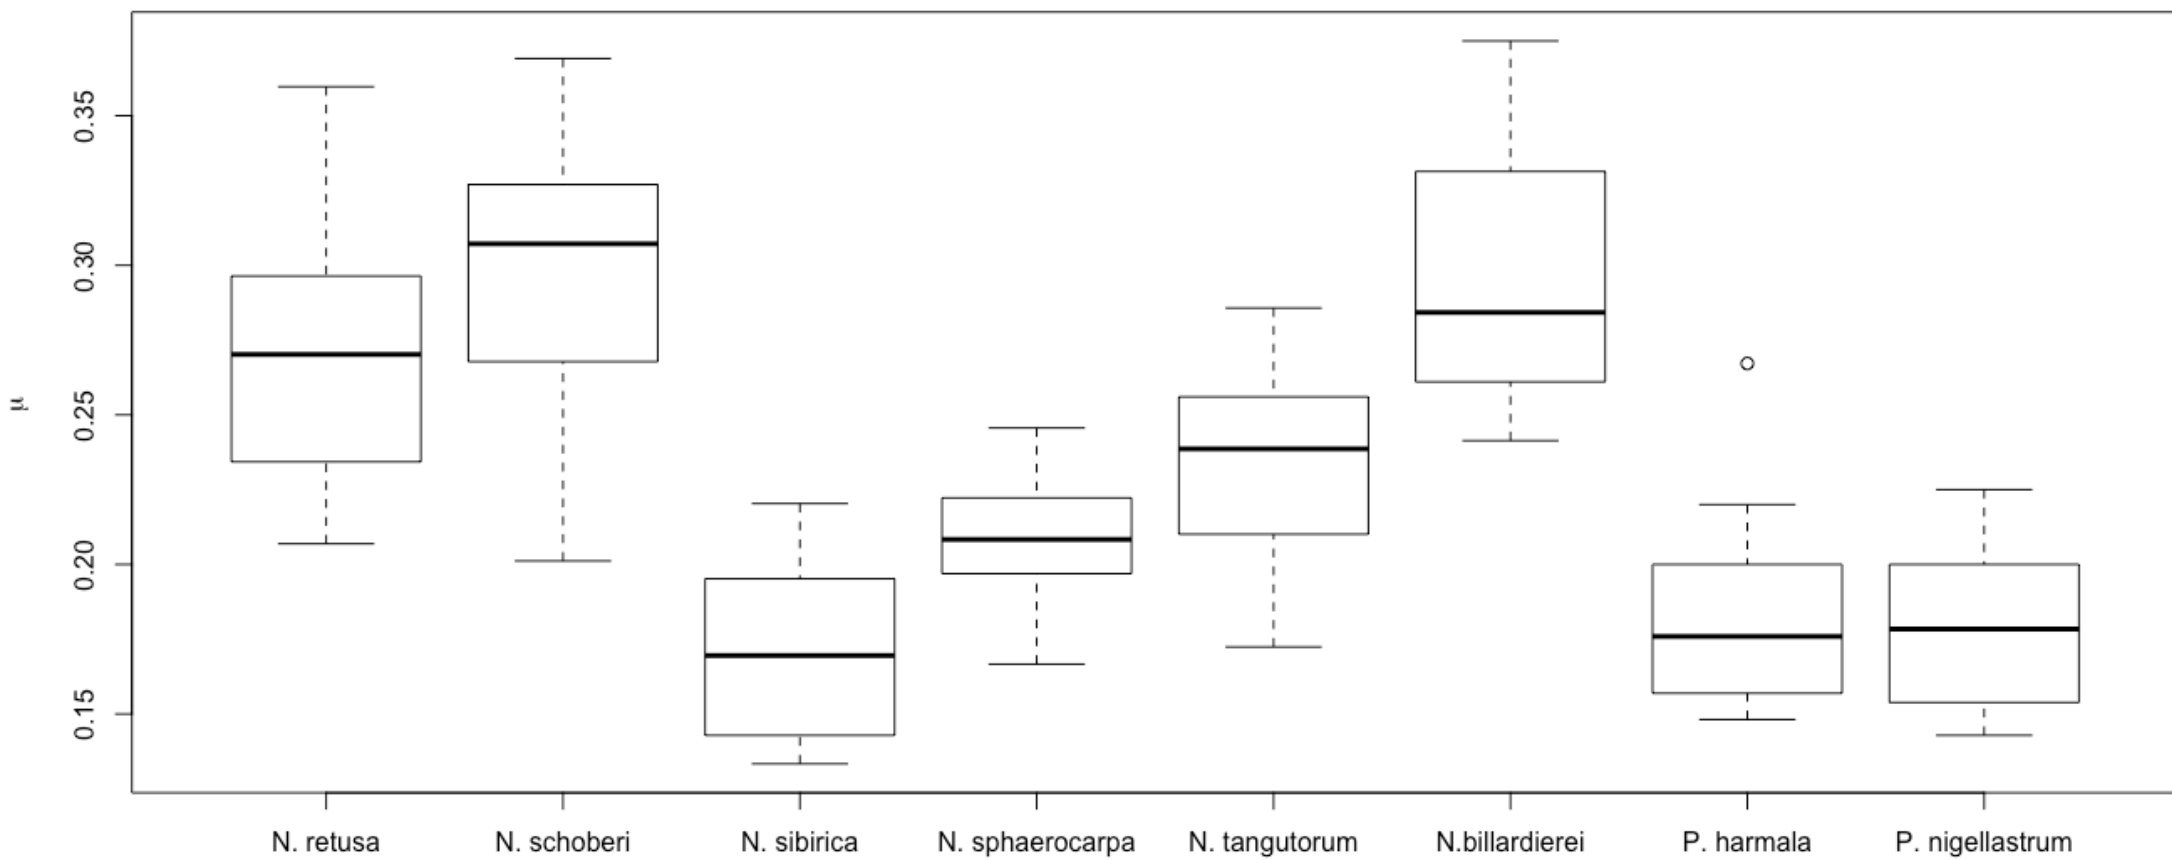

### Nexine equatorial view

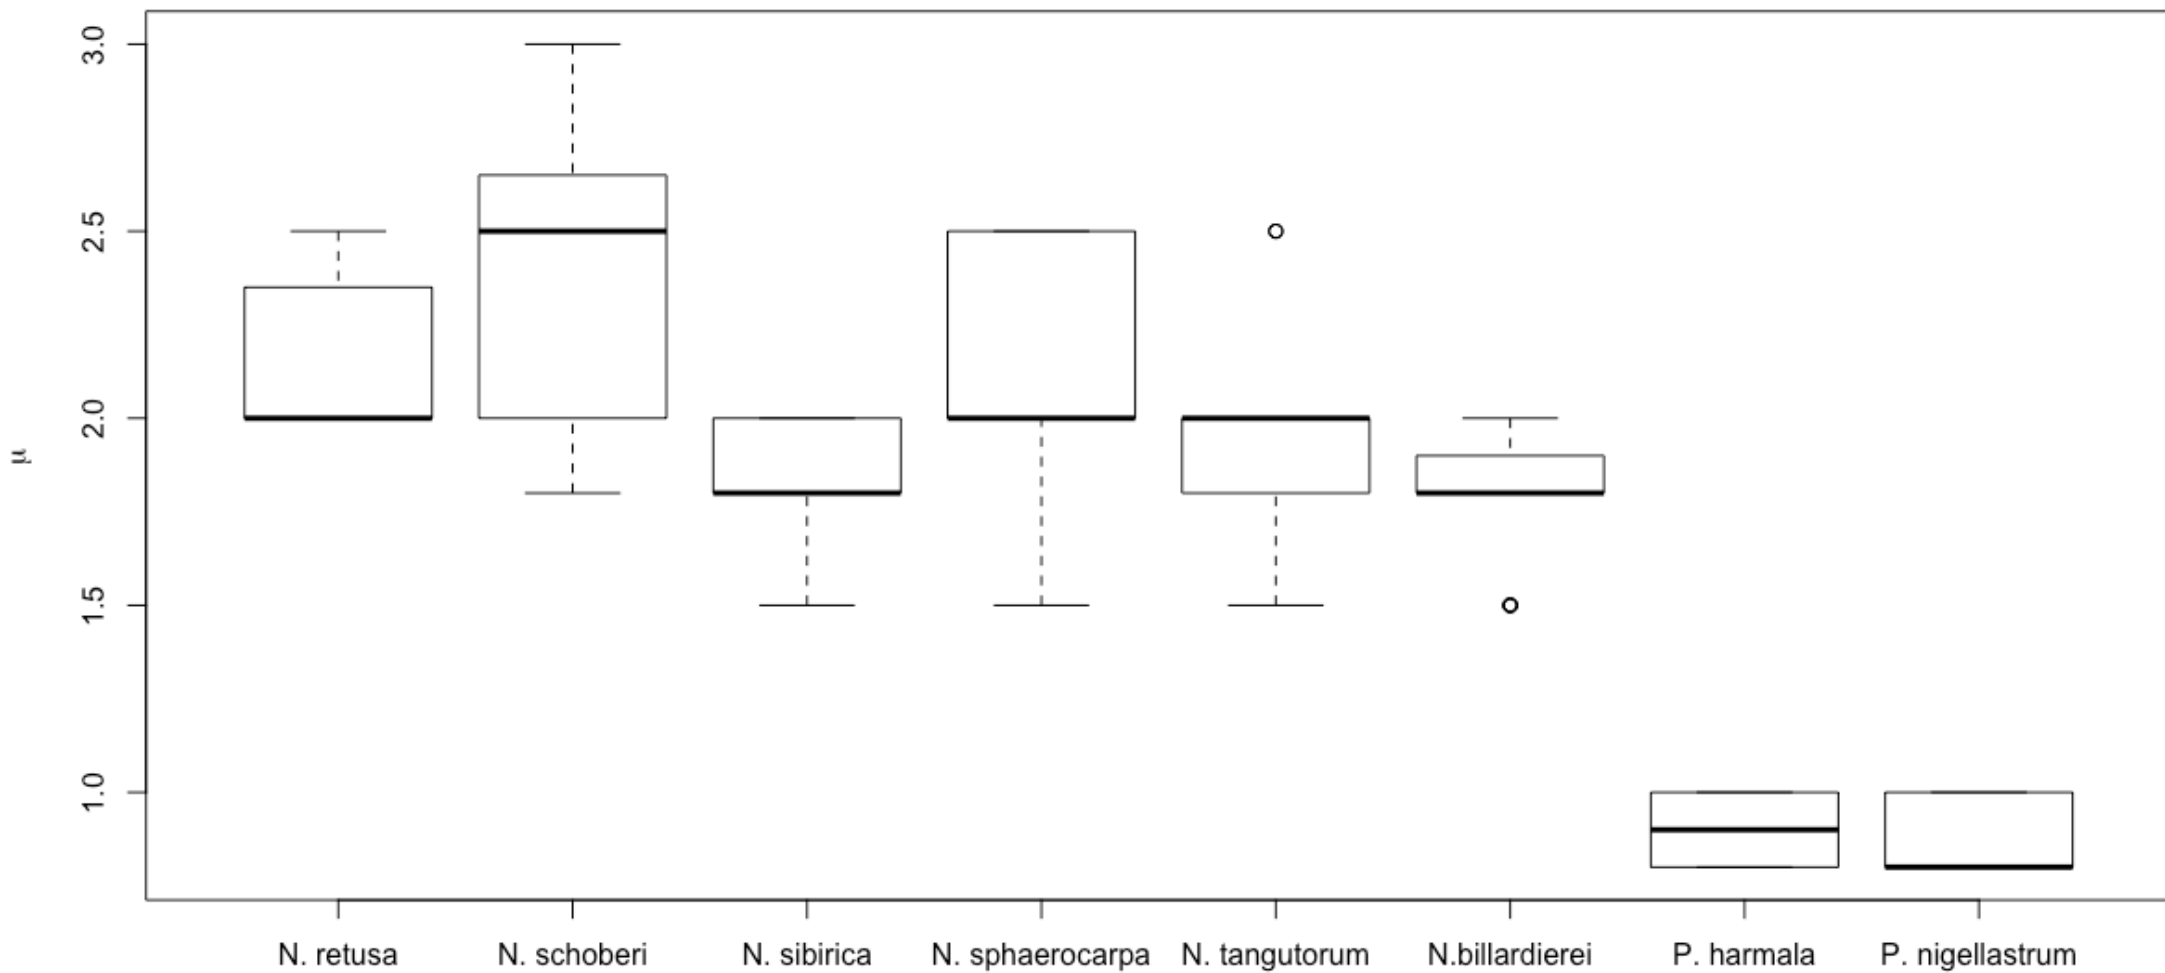

### P.E. - Shape ratio

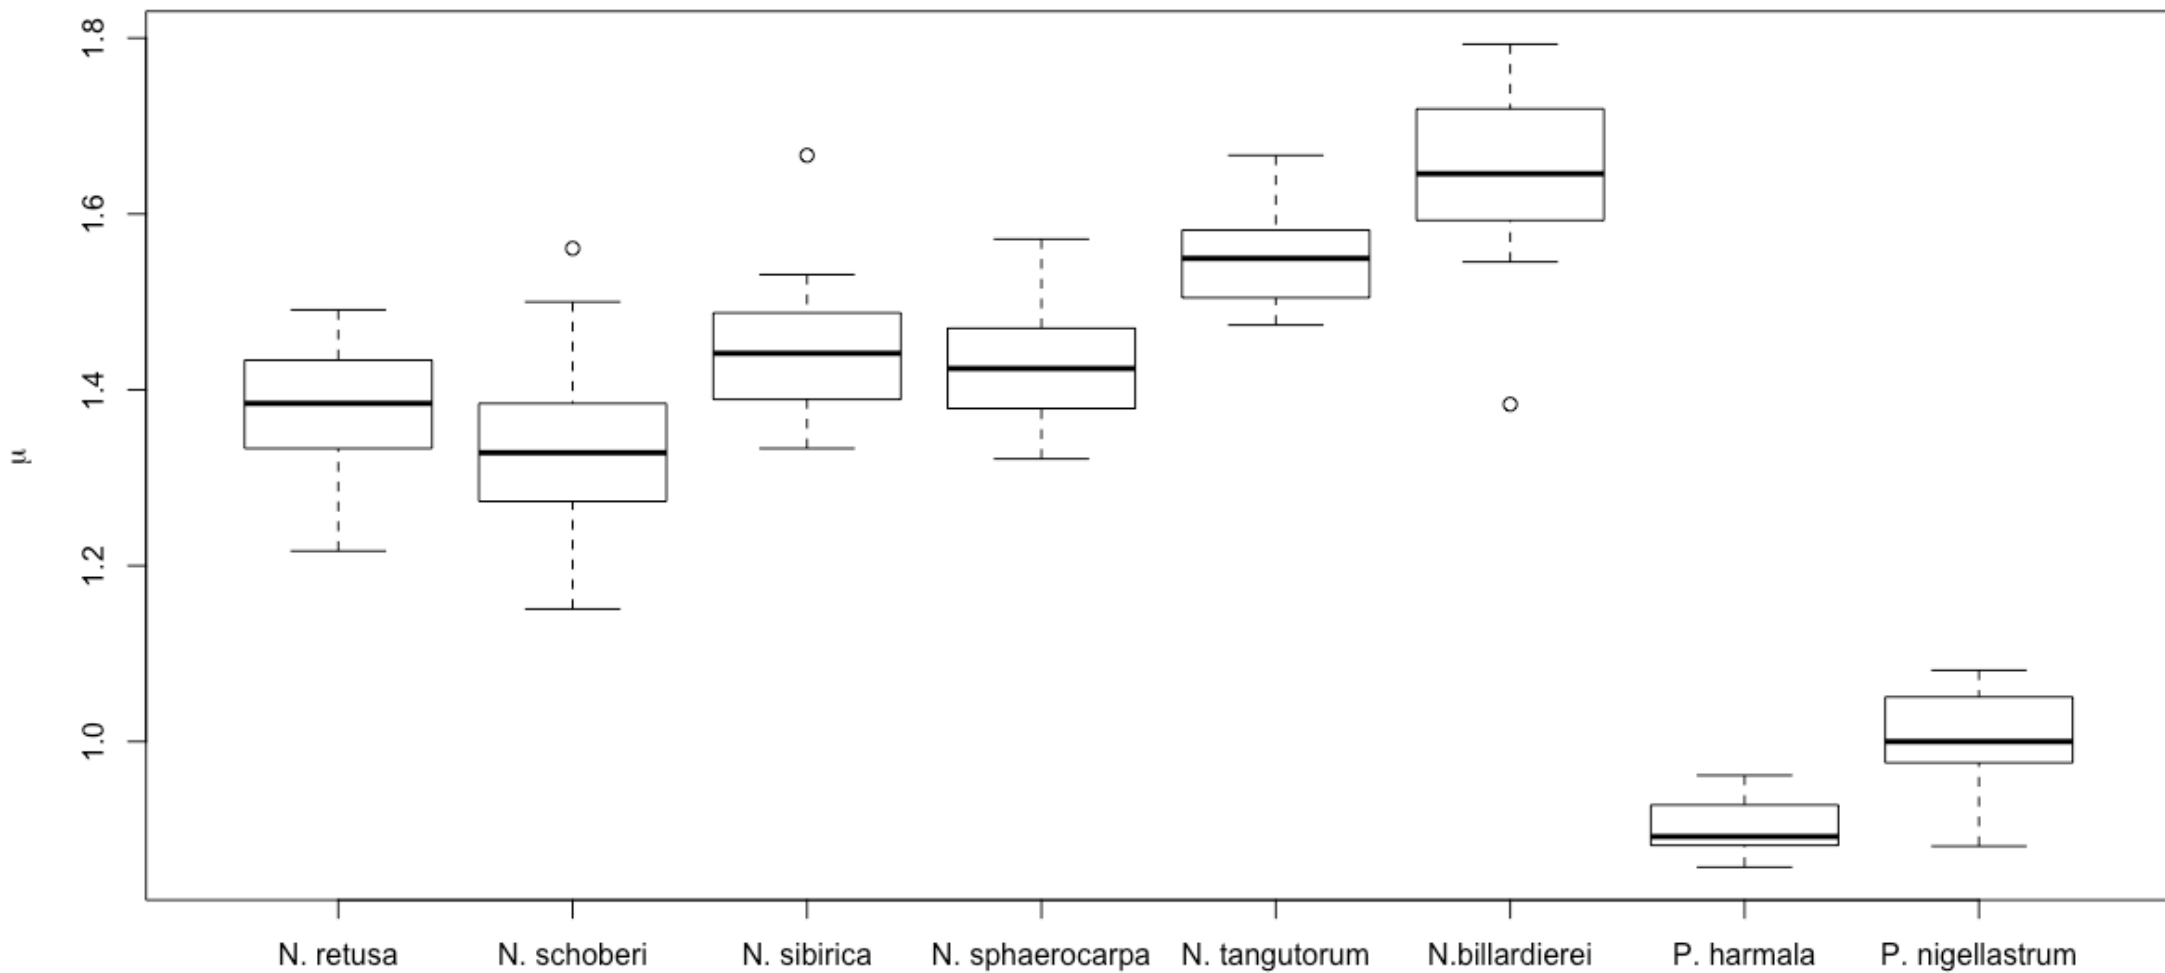

### Polar axis

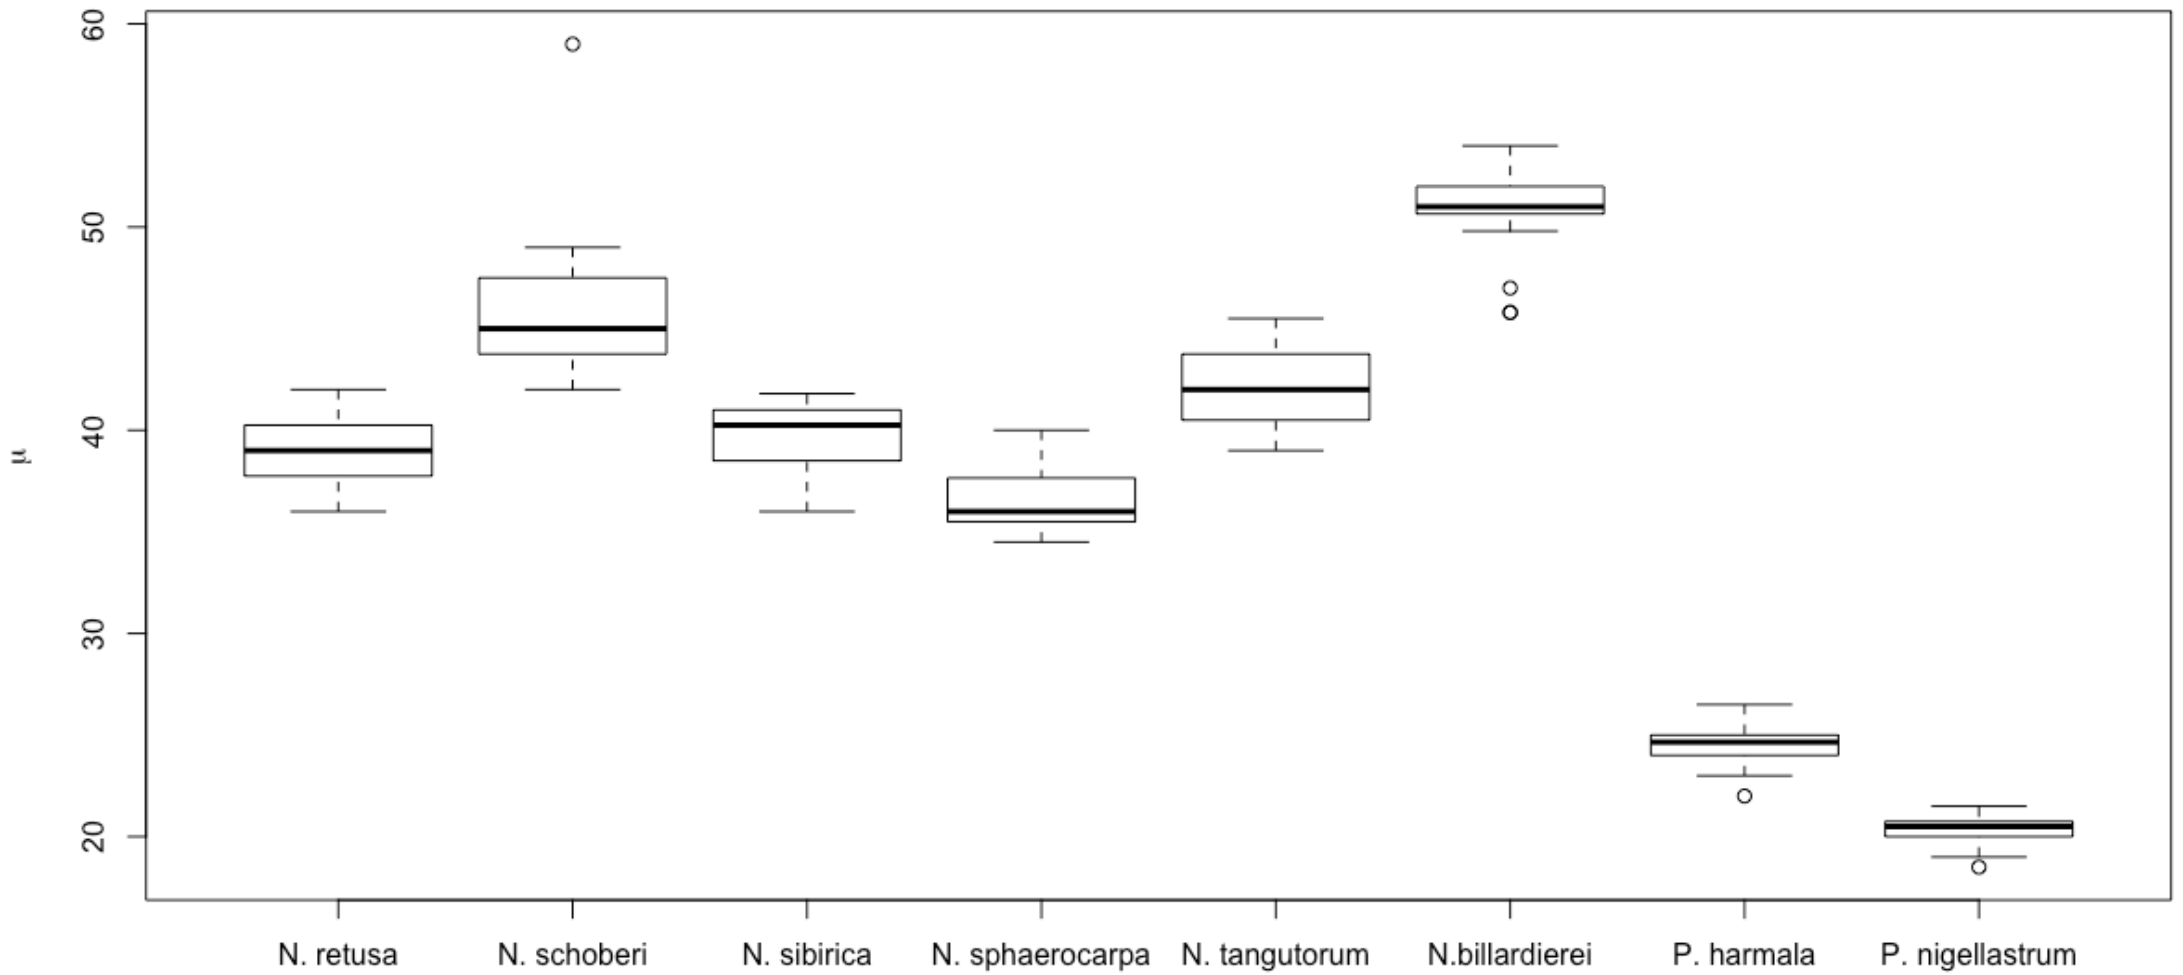

### Porus length

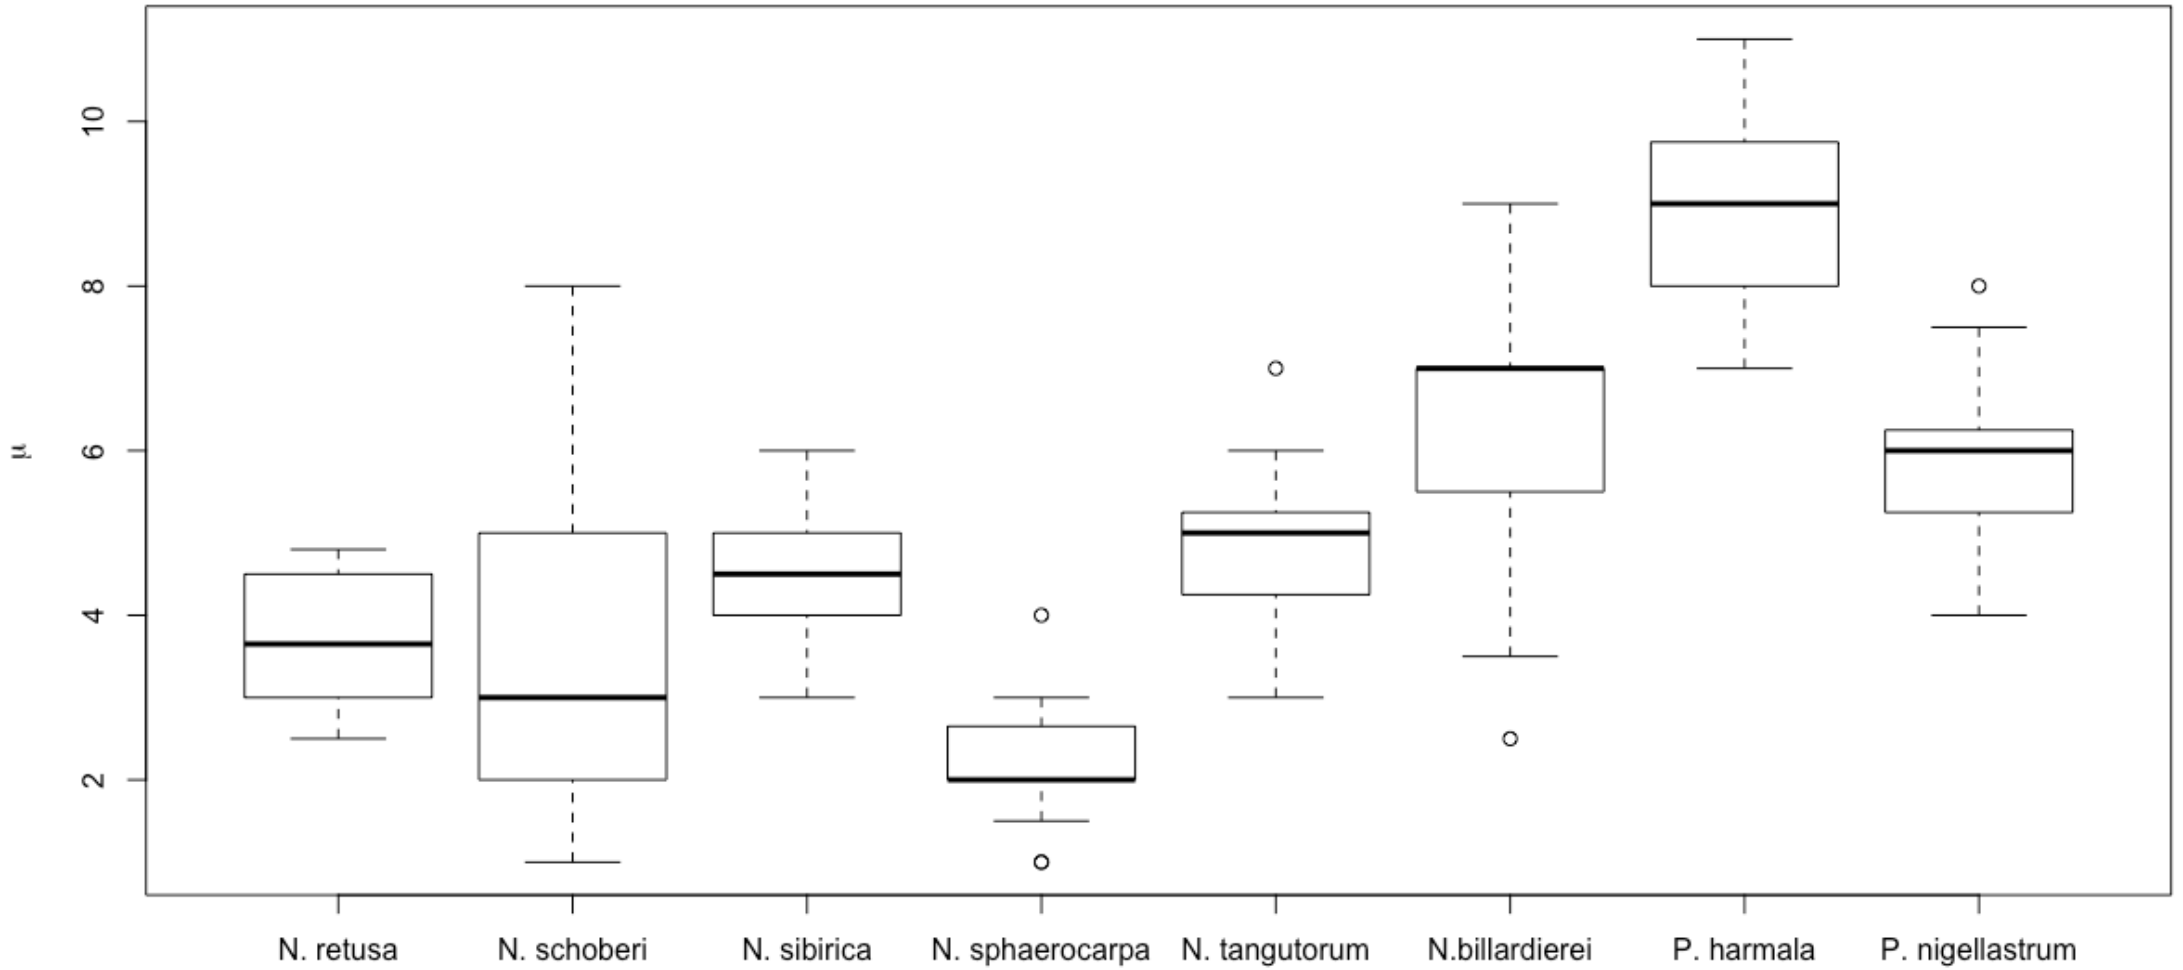



### Porus width

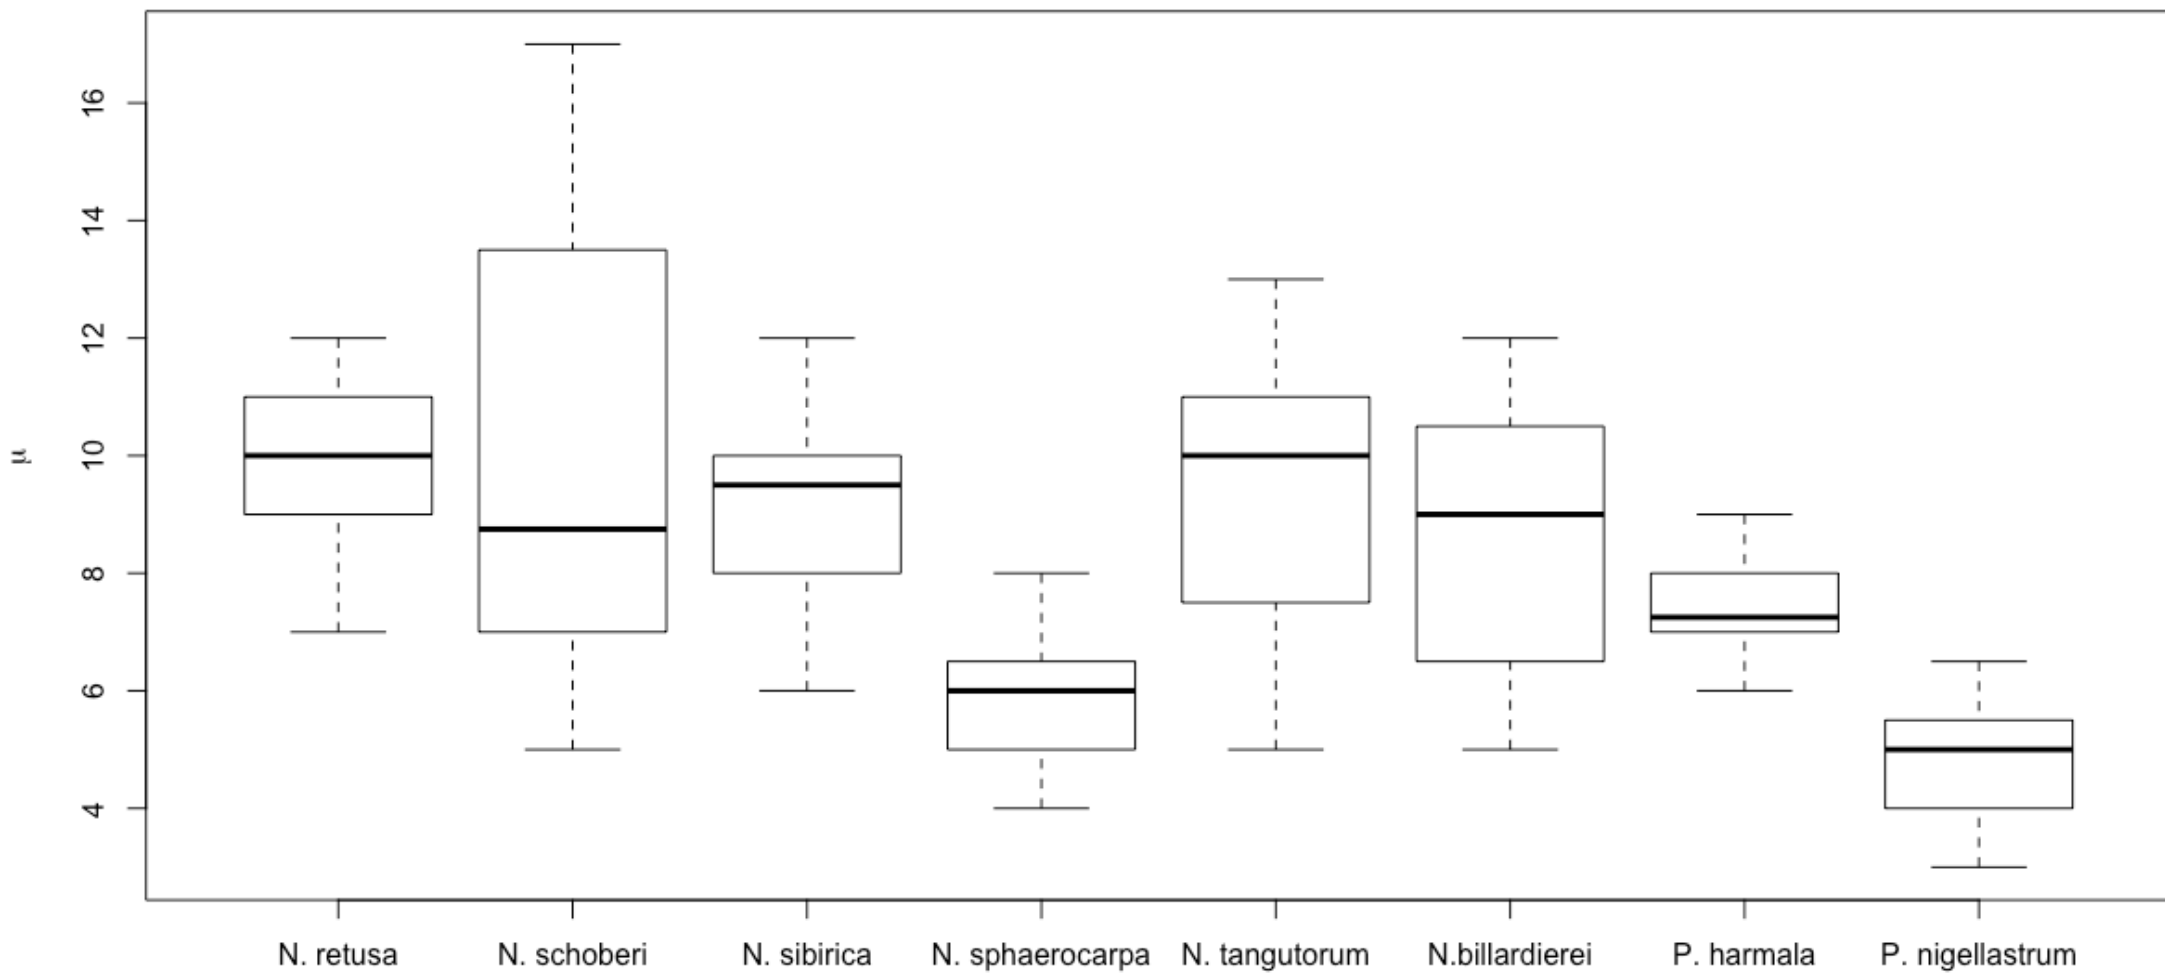

### Sexine equatorial view

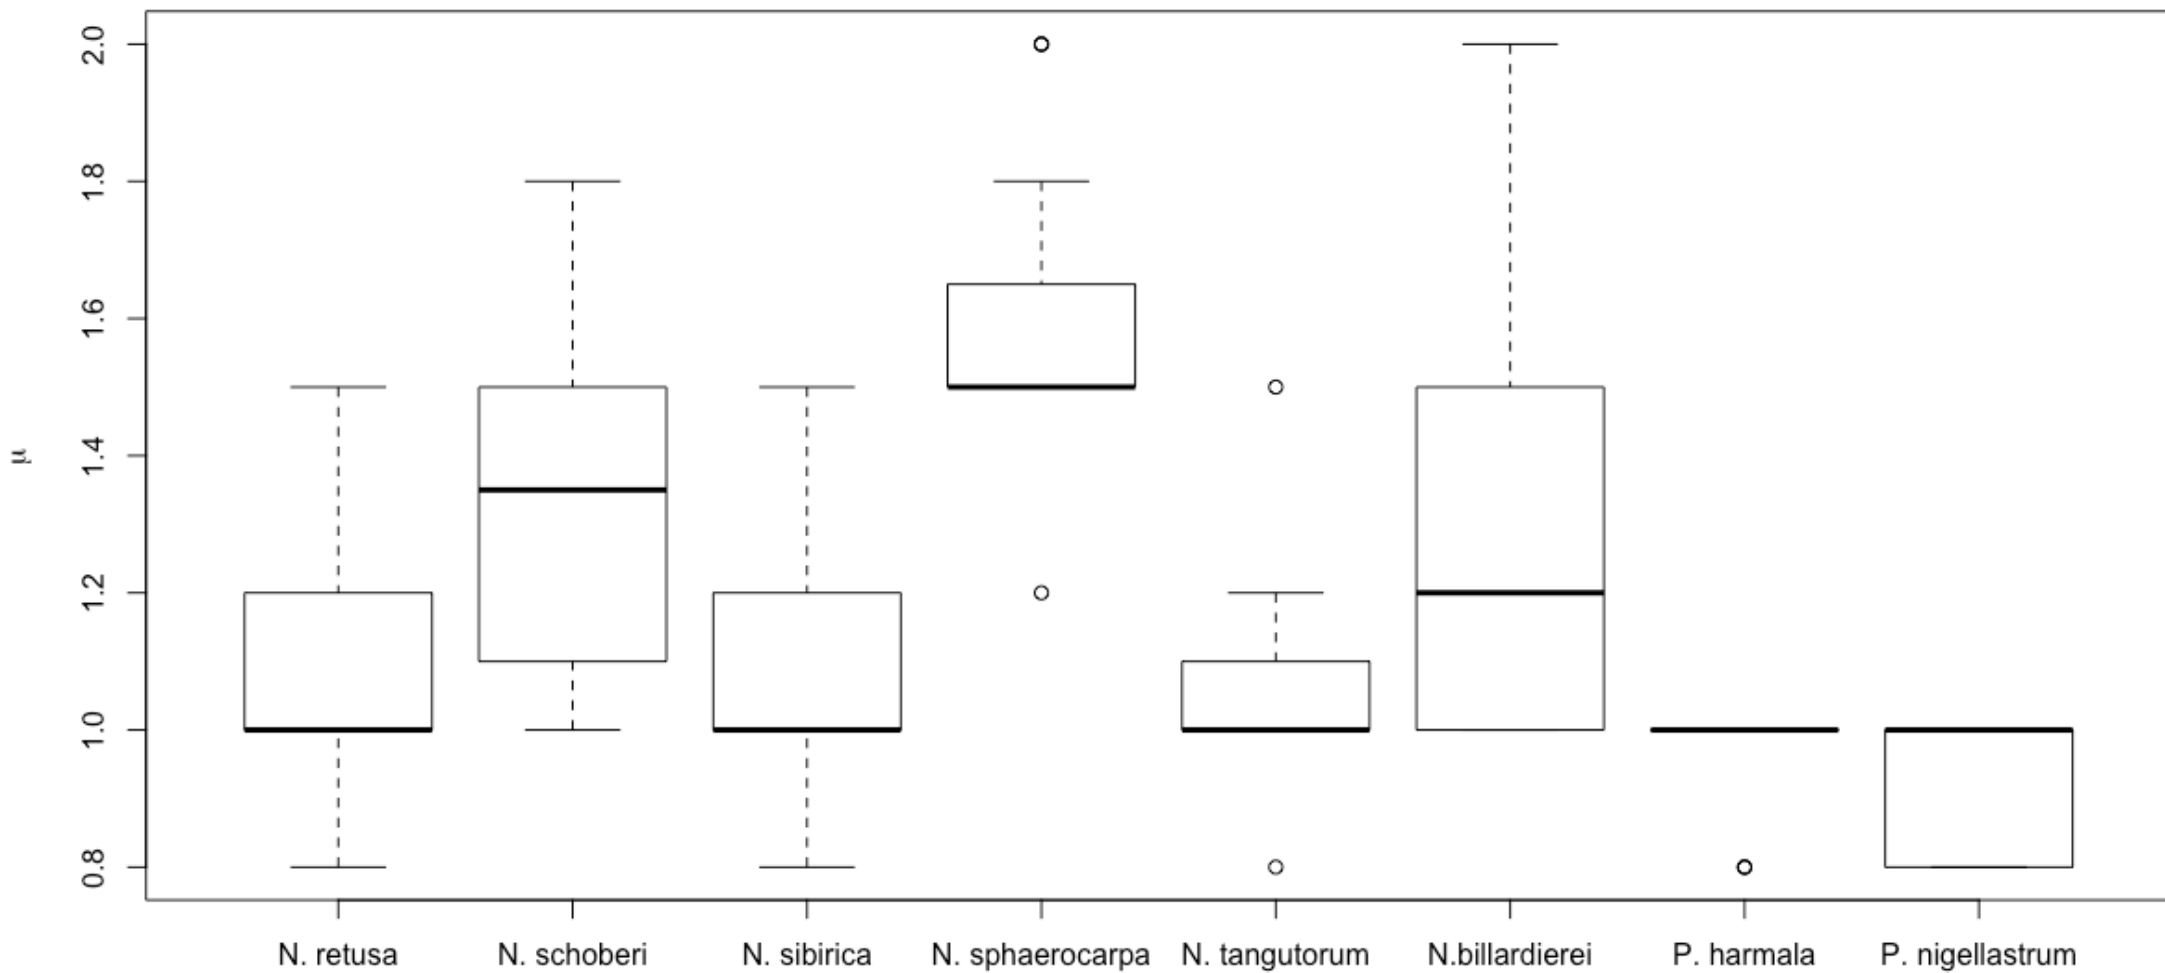

Supplement: Woutersenetal_Appendix04_Boxplots.pdf [file Woutersenetal_Appendix04_Boxplots.pdf]
