# Supplementary material for: A novel approach to study the morphology and chemistry of pollen in a phylogenetic context, applied to the halophytic taxon Nitraria L.(Nitrariaceae)
Source: PeerJ. 2018 Jul 19;6:e5055. doi: 10.7717/peerj.5055 (PMC6054868; doi:10.7717/peerj.5055)
Supplement: Appendix S1 [file peerj-06-5055-s001.xlsx]

## Sheet: Blad1
APPENDIX 1
Coordinates of the plotted specimens in Fig. 1, obtained from GBIF, Tropicos or own material, described in Appendix 2.
Specimen	lat (N)	lon ( E)	Source
Nitraria schoberi	42.6	85.5	GBIF
Nitraria schoberi	36.42	76.9	GBIF
Nitraria schoberi	37.28	77.12	GBIF
Nitraria schoberi	37.28	77.12	GBIF
Nitraria schoberi	45.12	26.78	GBIF
Nitraria schoberi	45.36	26.71	GBIF
Nitraria schoberi	-29.28	140.05	GBIF
Nitraria schoberi	45.34	26.71	GBIF
Nitraria schoberi	43.11	103.33	GBIF
Nitraria schoberi	-35.56	139.24	GBIF
Nitraria schoberi	37.57	112.28	GBIF
Nitraria schoberi	45.35	26.67	GBIF
Nitraria schoberi	-35.18	144.8	GBIF
Nitraria schoberi	-35.33	143.53	GBIF
Nitraria schoberi	-3.95	137.42	GBIF
Nitraria schoberi	-3.95	137.42	GBIF
Nitraria schoberi	-3.95	137.42	GBIF
Nitraria schoberi	-29.32	140	GBIF
Nitraria schoberi	31.83	36.82	GBIF
Nitraria schoberi	31.89	36.82	GBIF
Nitraria schoberi	38.12	76.13	GBIF
Nitraria schoberi	36.33	80.33	GBIF
Nitraria schoberi	34.9	68.03	GBIF
Nitraria schoberi	34.95	68.02	GBIF
Nitraria schoberi	34.83	67.98	GBIF
Nitraria schoberi	38.95	75.17	GBIF
Nitraria schoberi	38.95	75.17	GBIF
Nitraria schoberi	38.97	75.42	GBIF
Nitraria schoberi	37.3	77.13	GBIF
Nitraria schoberi	36.4	76.87	GBIF
Nitraria schoberi	36.68	77.05	GBIF
Nitraria schoberi	36.83	76.98	GBIF
Nitraria schoberi	37.28	77.12	GBIF
Nitraria schoberi	38.95	75.17	GBIF
Nitraria schoberi	37.4	77.2	GBIF
Nitraria schoberi	38.23	74.93	GBIF
Nitraria schoberi	37.92	75.17	GBIF
Nitraria schoberi	38.7	75	GBIF
Nitraria schoberi	36.38	75.38	GBIF
Nitraria schoberi	34.18	51.19	Own material
Nitraria retusa	34.96	29.57	GBIF
Nitraria retusa	35.34	31.12	GBIF
Nitraria retusa	35.5	32.02	GBIF
Nitraria retusa	35.24	30.99	GBIF
Nitraria retusa	35.47	31.75	GBIF
Nitraria retusa	35.26	30.79	GBIF
Nitraria retusa	34.77	30.83	GBIF
Nitraria retusa	35.25	30.77	GBIF
Nitraria retusa	35.26	30.79	GBIF
Nitraria retusa	35.02	29.84	GBIF
Nitraria retusa	35.34	31.01	GBIF
Nitraria retusa	35.34	30.92	GBIF
Nitraria retusa	35.26	30.79	GBIF
Nitraria retusa	35.47	32.01	GBIF
Nitraria retusa	35.25	30.76	GBIF
Nitraria retusa	34.92	30.61	GBIF
Nitraria retusa	34.92	29.57	GBIF
Nitraria retusa	34.92	29.57	GBIF
Nitraria retusa	35.18	30.56	GBIF
Nitraria retusa	35.23	30.65	GBIF
Nitraria retusa	35.51	31.99	GBIF
Nitraria retusa	35.26	30.79	GBIF
Nitraria retusa	35.45	31.71	GBIF
Nitraria retusa	13.86	28.5	GBIF
Nitraria retusa	34.96	29.56	GBIF
Nitraria retusa	35.44	31.71	GBIF
Nitraria retusa	35.5	32.02	GBIF
Nitraria retusa	34.97	29.54	GBIF
Nitraria retusa	35.13	30.52	GBIF
Nitraria retusa	35.26	30.79	GBIF
Nitraria retusa	35.45	31.71	GBIF
Nitraria retusa	35.37	31.46	GBIF
Nitraria retusa	35.47	31.74	GBIF
Nitraria retusa	35.47	32	GBIF
Nitraria retusa	35.36	31.65	GBIF
Nitraria retusa	34.97	30.61	GBIF
Nitraria retusa	35.48	32.01	GBIF
Nitraria retusa	35.52	31.97	GBIF
Nitraria retusa	34.77	30.83	GBIF
Nitraria retusa	35.46	31.76	GBIF
Nitraria retusa	35.47	32	GBIF
Nitraria retusa	35.36	31.65	GBIF
Nitraria retusa	34.97	30.61	GBIF
Nitraria retusa	35.48	32.01	GBIF
Nitraria retusa	35.52	31.97	GBIF
Nitraria retusa	34.77	30.83	GBIF
Nitraria retusa	35.46	31.76	GBIF
Nitraria retusa	35.44	31.7	GBIF
Nitraria retusa	35.04	29.82	GBIF
Nitraria retusa	35.47	32	GBIF
Nitraria retusa	34.81	30.83	GBIF
Nitraria retusa	35.23	31.1	GBIF
Nitraria retusa	35.43	31.69	GBIF
Nitraria retusa	35.5	31.78	GBIF
Nitraria retusa	35.26	30.79	GBIF
Nitraria retusa	35.47	32	GBIF
Nitraria retusa	35.48	32	GBIF
Nitraria retusa	35.46	31.87	GBIF
Nitraria retusa	35	29.67	GBIF
Nitraria retusa	34.92	30.56	GBIF
Nitraria retusa	34.97	29.66	GBIF
Nitraria retusa	34.87	30.79	GBIF
Nitraria retusa	35.04	29.87	GBIF
Nitraria retusa	35.44	31.71	GBIF
Nitraria retusa	35.45	31.71	GBIF
Nitraria retusa	35.26	30.79	GBIF
Nitraria retusa	35.51	31.8	GBIF
Nitraria retusa	35.49	32	GBIF
Nitraria retusa	34.92	29.52	GBIF
Nitraria retusa	13.86	28.5	GBIF
Nitraria retusa	35.47	32.01	GBIF
Nitraria retusa	34.89	30.76	GBIF
Nitraria retusa	34.81	30.81	GBIF
Nitraria retusa	34.96	29.54	GBIF
Nitraria retusa	35.02	29.89	GBIF
Nitraria retusa	35.39	30.97	GBIF
Nitraria retusa	34.87	30.61	GBIF
Nitraria retusa	34.87	29.8	GBIF
Nitraria retusa	34.87	30.61	GBIF
Nitraria retusa	34.87	29.8	GBIF
Nitraria retusa	35.44	31.71	GBIF
Nitraria retusa	35.48	31.99	GBIF
Nitraria retusa	35.5	31.98	GBIF
Nitraria retusa	35.46	32.01	GBIF
Nitraria retusa	35.23	30.88	GBIF
Nitraria retusa	35.42	32.07	GBIF
Nitraria retusa	35.51	32.02	GBIF
Nitraria retusa	35.26	30.79	GBIF
Nitraria retusa	34.77	30.83	GBIF
Nitraria retusa	35.45	31.72	GBIF
Nitraria retusa	35.26	30.78	GBIF
Nitraria retusa	35.47	31.99	GBIF
Nitraria retusa	35.25	30.77	GBIF
Nitraria retusa	35.49	32.01	GBIF
Nitraria retusa	35.44	31.71	GBIF
Nitraria retusa	35.47	32.01	GBIF
Nitraria retusa	35.26	30.79	GBIF
Nitraria retusa	34.84	30.79	GBIF
Nitraria retusa	35.23	30.74	GBIF
Nitraria retusa	35.34	31.1	GBIF
Nitraria retusa	35.25	30.77	GBIF
Nitraria retusa	35.26	30.79	GBIF
Nitraria retusa	35.47	32.01	GBIF
Nitraria retusa	34.77	30.83	GBIF
Nitraria retusa	35.46	32.01	GBIF
Nitraria retusa	35.38	30.93	GBIF
Nitraria retusa	13.86	38.5	GBIF
Nitraria retusa	35.44	31.71	GBIF
Nitraria retusa	35.48	32.01	GBIF
Nitraria retusa	35.25	30.77	GBIF
Nitraria retusa	35.34	31.12	GBIF
Nitraria retusa	35.48	32.01	GBIF
Nitraria retusa	34.97	29.58	GBIF
Nitraria retusa	35.53	31.82	GBIF
Nitraria retusa	33.83	27.18	GBIF
Nitraria retusa	35.25	30.77	GBIF
Nitraria retusa	35.46	31.73	GBIF
Nitraria retusa	35.04	30.94	GBIF
Nitraria retusa	35.45	31.71	GBIF
Nitraria retusa	35.45	31.71	GBIF
Nitraria retusa	35.44	31.71	GBIF
Nitraria retusa	35.46	31.71	GBIF
Nitraria retusa	35.25	30.76	GBIF
Nitraria retusa	35.06	29.89	GBIF
Nitraria retusa	35.02	29.8	GBIF
Nitraria retusa	35.34	30.97	GBIF
Nitraria retusa	35.05	31.46	GBIF
Nitraria retusa	35.47	32.01	GBIF
Nitraria retusa	35.26	30.79	GBIF
Nitraria retusa	35.26	30.79	GBIF
Nitraria retusa	35.26	30.79	GBIF
Nitraria retusa	34.9	30.76	GBIF
Nitraria retusa	35.46	32.01	GBIF
Nitraria retusa	35.47	31.77	GBIF
Nitraria retusa	34.87	29.79	GBIF
Nitraria retusa	35.44	31.7	GBIF
Nitraria retusa	35.5	31.98	GBIF
Nitraria retusa	35.46	32.01	GBIF
Nitraria retusa	35.37	31.45	GBIF
Nitraria retusa	34.87	29.79	GBIF
Nitraria retusa	35.44	31.7	GBIF
Nitraria retusa	35.5	31.98	GBIF
Nitraria retusa	35.46	32.01	GBIF
Nitraria retusa	35.34	31.37	GBIF
Nitraria retusa	35.5	31.87	GBIF
Nitraria retusa	35.25	31	GBIF
Nitraria retusa	35.37	31.44	GBIF
Nitraria retusa	35.45	32.02	GBIF
Nitraria retusa	35.51	31.79	GBIF
Nitraria retusa	35.02	30.97	GBIF
Nitraria retusa	35.28	30.88	GBIF
Nitraria retusa	35.34	31.06	GBIF
Nitraria retusa	35.39	31.64	GBIF
Nitraria retusa	34.87	30.56	GBIF
Nitraria retusa	35.45	31.71	GBIF
Nitraria retusa	35.26	30.79	GBIF
Nitraria retusa	35.39	31.59	GBIF
Nitraria retusa	35.26	30.79	GBIF
Nitraria retusa	35.24	31.12	GBIF
Nitraria retusa	35.03	29.87	GBIF
Nitraria retusa	35.18	30.79	GBIF
Nitraria retusa	35.17	30.48	GBIF
Nitraria retusa	34.97	29.55	GBIF
Nitraria retusa	35.46	32.02	GBIF
Nitraria retusa	35.25	30.77	GBIF
Nitraria retusa	35.48	32.01	GBIF
Nitraria retusa	35.26	30.79	GBIF
Nitraria retusa	35.48	31.99	GBIF
Nitraria retusa	35.42	31.85	GBIF
Nitraria retusa	35.25	30.77	GBIF
Nitraria retusa	35.37	31.66	GBIF
Nitraria retusa	35.26	30.79	GBIF
Nitraria retusa	35.47	32	GBIF
Nitraria retusa	35.26	30.78	GBIF
Nitraria retusa	35.37	31.45	GBIF
Nitraria retusa	34.76	30.83	GBIF
Nitraria retusa	35.13	30.25	GBIF
Nitraria retusa	35.13	30.97	GBIF
Nitraria retusa	35.5	31.96	GBIF
Nitraria retusa	35.47	32.01	GBIF
Nitraria retusa	35.25	30.77	GBIF
Nitraria retusa	35.23	30.7	GBIF
Nitraria retusa	35.44	31.73	GBIF
Nitraria retusa	35.44	32.01	GBIF
Nitraria retusa	35.39	31.61	GBIF
Nitraria retusa	35.44	31.71	GBIF
Nitraria retusa	34.97	29.71	GBIF
Nitraria retusa	35.28	30.97	GBIF
Nitraria retusa	13.86	28.5	GBIF
Nitraria retusa	35.26	30.79	GBIF
Nitraria retusa	35.25	30.77	GBIF
Nitraria retusa	31.71	35.46	GBIF
Nitraria retusa	31.83	35.55	GBIF
Nitraria retusa	34	9	GBIF
Nitraria retusa	27.27	2.53	GBIF
Nitraria retusa	27.27	2.53	GBIF
Nitraria retusa	31.84	36.82	GBIF
Nitraria retusa	36.82	10.19	GBIF
Nitraria retusa	29.65	35	GBIF
Nitraria retusa	29.87	35.05	GBIF
Nitraria retusa	31.76	35.5	GBIF
Nitraria retusa	29.66	35	GBIF
Nitraria retusa	23.23	-16	GBIF
Nitraria retusa	20.26	-10.33	GBIF
Nitraria retusa	24.12	44.55	GBIF
Nitraria retusa	29.34	47.59	GBIF
Nitraria retusa	30.75	38	GBIF
Nitraria retusa	34.13	9.22	GBIF
Nitraria retusa	28.16	2.63	GBIF
Nitraria retusa	18.12	-16.04	GBIF
Nitraria retusa	18.12	-16.04	GBIF
Nitraria retusa	18.12	-16.04	GBIF
Nitraria retusa	31.58	35.55	GBIF
Nitraria retusa	29.16	47.69	GBIF
Nitraria retusa	28.55	48.38	GBIF
Nitraria retusa	28.54	48.42	GBIF
Nitraria retusa	29.28	47.93	GBIF
Nitraria retusa	36.02	10.42	GBIF
Nitraria retusa	16.2	-16.38	GBIF
Nitraria retusa	16.37	-16.27	GBIF
Nitraria retusa	31.75	35.49	Own material
Nitraria sibirica	43.58	78.14	GBIF
Nitraria sibirica	36.24	100.58	GBIF
Nitraria sibirica	36.2	100.72	GBIF
Nitraria sibirica	43.33	76.91	GBIF
Nitraria sibirica	50.67	93.03	GBIF
Nitraria sibirica	35.77	96.05	GBIF
Nitraria sibirica	53.72	110.1	GBIF
Nitraria sibirica	38.04	102.58	Tropicos
Nitraria sibirica	40.72	115.42	Tropicos
Nitraria sibirica	43.66	126.19	Tropicos
Nitraria sibirica	41.3	122.61	Tropicos
Nitraria sibirica	44.09	113.91	Tropicos
Nitraria sibirica	37.25	106.16	Tropicos
Nitraria sibirica	35.75	96	Tropicos
Nitraria sibirica	35.2	108.87	Tropicos
Nitraria sibirica	36.35	118.15	Tropicos
Nitraria sibirica	37.58	112.29	Tropicos
Nitraria sibirica	41.11	85.2	Tropicos
Nitraria sibirica (Pall.)	38.86	105.76	Own material
Nitraria sphaerocarpa	36.08	103.76	GBIF
Nitraria sphaerocarpa	30.1	102.58	Tropicos
Nitraria sphaerocarpa	44.09	113.91	Tropicos
Nitraria sphaerocarpa	41.11	85.2	Tropicos
Nitraria sphaerocarpa	39.53	75.92	Own material
Nitraria tangutorum	36.2	100.72	GBIF
Nitraria tangutorum	36.52	103.89	GBIF
Nitraria tangutorum	35.77	96.05	GBIF
Nitraria tangutorum	38.04	102.58	Tropicos
Nitraria tangutorum	40.72	115.42	Tropicos
Nitraria tangutorum	44.09	113.91	Tropicos
Nitraria tangutorum	35.75	96	Tropicos
Nitraria tangutorum	35.2	108.87	Tropicos
Nitraria tangutorum	41.11	85.2	Tropicos
Nitraria tangutorum	31.69	88.13	Tropicos
Nitraria tangutorum	101.58	38.8	Own material
Nitraria roborowskii	37.27	106.16	Tropicos
Nitraria roborowskii	44.09	113.91	Tropicos
Nitraria roborowskii	38.04	102.58	Tropicos
Nitraria roborowskii	35.75	96	Tropicos
Nitraria roborowskii	35.2	108.87	Tropicos
Nitraria roborowskii	41.11	85.2	Tropicos
Nitraria billardierei	-35	143	Own material
Nitraria billardierei	-33.2811	141.191	GBIF
Nitraria billardierei	-33.2811	141.191	GBIF
Nitraria billardierei	-33.2535	141.26	GBIF
Nitraria billardierei	-33.2535	141.26	GBIF
Nitraria billardierei	-33.2158	141.167	GBIF
Nitraria billardierei	-33.2535	141.26	GBIF
Nitraria billardierei	-33.2158	141.167	GBIF
Nitraria billardierei	-33.2158	141.167	GBIF
Nitraria billardierei	-27.925	144.878	GBIF
Nitraria billardierei	-25.0819	146.251	GBIF
Nitraria billardierei	-25.0819	146.251	GBIF
Nitraria billardierei	-35.1441	142.459	GBIF
Nitraria billardierei	-35.8946	141.971	GBIF
Nitraria billardierei	-35.8047	144.07	GBIF
Nitraria billardierei	-36.9852	143.125	GBIF
Nitraria billardierei	-36.9538	143.188	GBIF
Nitraria billardierei	-37.0114	142.894	GBIF
Nitraria billardierei	-37.0587	143.17	GBIF
Nitraria billardierei	-37.0702	143.18	GBIF
Nitraria billardierei	-37.3965	143.021	GBIF
Nitraria billardierei	-37.5334	142.751	GBIF
Nitraria billardierei	-37.0551	142.869	GBIF
Nitraria billardierei	-37.0113	142.859	GBIF
Nitraria billardierei	-34.9284	142.813	GBIF
Nitraria billardierei	-34.9431	142.805	GBIF
Nitraria billardierei	-35.2305	142.122	GBIF
Nitraria billardierei	-35.2749	143.077	GBIF
Nitraria billardierei	-35.3034	143.356	GBIF
Nitraria billardierei	-35.2233	142.862	GBIF
Nitraria billardierei	-35.6595	143.639	GBIF
Nitraria billardierei	-35.3598	143.051	GBIF
Nitraria billardierei	-35.5816	143.113	GBIF
Nitraria billardierei	-35.714	143.403	GBIF
Nitraria billardierei	-35.6241	143.7	GBIF
Nitraria billardierei	-34.9689	141.421	GBIF
Nitraria billardierei	-34.89	141.728	GBIF
Nitraria billardierei	-34.9417	141.479	GBIF
Nitraria billardierei	-34.9494	141.477	GBIF
Nitraria billardierei	-34.4094	141.073	GBIF
Nitraria billardierei	-34.2178	141.186	GBIF
Nitraria billardierei	-34.2125	141.18	GBIF
Nitraria billardierei	-34.2094	141.18	GBIF
Nitraria billardierei	-34.1814	141.116	GBIF
Nitraria billardierei	-35.2427	141.827	GBIF
Nitraria billardierei	-35.2154	141.335	GBIF
Nitraria billardierei	-35.2309	141.349	GBIF
Nitraria billardierei	-35.5717	143.839	GBIF
Nitraria billardierei	-35.4251	143.701	GBIF
Nitraria billardierei	-35.5757	143.84	GBIF
Nitraria billardierei	-35.5757	143.838	GBIF
Nitraria billardierei	-35.4725	143.753	GBIF
Nitraria billardierei	-35.5507	143.711	GBIF
Nitraria billardierei	-35.5497	143.715	GBIF
Nitraria billardierei	-35.6046	143.699	GBIF
Nitraria billardierei	-35.6052	143.702	GBIF
Nitraria billardierei	-35.5088	143.707	GBIF
Nitraria billardierei	-35.7806	143.596	GBIF
Nitraria billardierei	-34.6944	142.879	GBIF
Nitraria billardierei	-34.8222	143.274	GBIF
Nitraria billardierei	-35.7833	143.584	GBIF
Nitraria billardierei	-34.5161	140.978	GBIF
Nitraria billardierei	-35.3524	143.051	GBIF
Nitraria billardierei	-35.6323	143.7	GBIF
Nitraria billardierei	-35.0126	142.756	GBIF
Nitraria billardierei	-34.173	141.867	GBIF
Nitraria billardierei	-35.6903	143.25	GBIF
Nitraria billardierei	-34.2323	142.125	GBIF
Nitraria billardierei	-34.249	142.105	GBIF
Nitraria billardierei	-34.9069	141.686	GBIF
Nitraria billardierei	-34.2092	142.113	GBIF
Nitraria billardierei	-34.2102	142.112	GBIF
Nitraria billardierei	-34.2071	142.11	GBIF
Nitraria billardierei	-34.2088	142.108	GBIF
Nitraria billardierei	-35.6858	143.875	GBIF
Nitraria billardierei	-36.1122	144.43	GBIF
Nitraria billardierei	-34.2107	141.503	GBIF
Nitraria billardierei	-34.6772	142.99	GBIF
Nitraria billardierei	-34.6972	142.936	GBIF
Nitraria billardierei	-35.6	143.6	GBIF
Nitraria billardierei	-35.6	143.6	GBIF
Nitraria billardierei	-35.7	143.4	GBIF
Nitraria billardierei	-35.5	143.1	GBIF
Nitraria billardierei	-35.3	143	GBIF
Nitraria billardierei	-35.2	141.8	GBIF
Nitraria billardierei	-35.2	141.3	GBIF
Nitraria billardierei	-35.2	141.3	GBIF
Nitraria billardierei	-35.265	142.368	GBIF
Nitraria billardierei	-34.8983	142.468	GBIF
Nitraria billardierei	-34.865	142.826	GBIF
Nitraria billardierei	-34.7983	141.568	GBIF
Nitraria billardierei	-34.9983	142.314	GBIF
Nitraria billardierei	-34.6891	142.203	GBIF
Nitraria billardierei	-34.7483	142.501	GBIF
Nitraria billardierei	-34.8844	143.143	GBIF
Nitraria billardierei	-34.815	142.985	GBIF
Nitraria billardierei	-34.6983	141.585	GBIF
Nitraria billardierei	-34.615	141.785	GBIF
Nitraria billardierei	-34.5316	141.229	GBIF
Nitraria billardierei	-35.3	143.3	GBIF
Nitraria billardierei	-35.2	143	GBIF
Nitraria billardierei	-35.3	143	GBIF
Nitraria billardierei	-35.2	142.8	GBIF
Nitraria billardierei	-34.9	142.8	GBIF
Nitraria billardierei	-34.9	142.8	GBIF
Nitraria billardierei	-35.2	142.1	GBIF
Nitraria billardierei	-34.8	141.7	GBIF
Nitraria billardierei	-34.9	141.4	GBIF
Nitraria billardierei	-34.9	141.4	GBIF
Nitraria billardierei	-34.9	141.4	GBIF
Nitraria billardierei	-34.2	141.1	GBIF
Nitraria billardierei	-34.2	141.1	GBIF
Nitraria billardierei	-34.2	141.1	GBIF
Nitraria billardierei	-34.1	141.1	GBIF
Nitraria billardierei	-34.4	141	GBIF
Nitraria billardierei	-34.5	140.9	GBIF
Nitraria billardierei	-34.7228	141.663	GBIF
Nitraria billardierei	-35	142.7	GBIF
Nitraria billardierei	-35.6	143.2	GBIF
Nitraria billardierei	-34.1	141.8	GBIF
Nitraria billardierei	-35.4227	142.889	GBIF
Nitraria billardierei	-35.5908	143.743	GBIF
Nitraria billardierei	-35.5302	143.791	GBIF
Nitraria billardierei	-35.563	143.797	GBIF
Nitraria billardierei	-35.6852	143.819	GBIF
Nitraria billardierei	-35.775	143.055	GBIF
Nitraria billardierei	-35.6544	143.134	GBIF
Nitraria billardierei	-34.9369	142.206	GBIF
Nitraria billardierei	-35.038	142.917	GBIF
Nitraria billardierei	-35.0727	142.918	GBIF
Nitraria billardierei	-35.1166	142.273	GBIF
Nitraria billardierei	-34.3602	141.962	GBIF
Nitraria billardierei	-34.5116	141.55	GBIF
Nitraria billardierei	-35.1039	142.008	GBIF
Nitraria billardierei	-34.3766	141.114	GBIF
Nitraria billardierei	-34.1723	141.663	GBIF
Nitraria billardierei	-34.2525	141.621	GBIF
Nitraria billardierei	-34.3058	141.416	GBIF
Nitraria billardierei	-34.2145	141.494	GBIF
Nitraria billardierei	-34.1828	141.33	GBIF
Nitraria billardierei	-36.0057	144.423	GBIF
Nitraria billardierei	-36.0057	144.423	GBIF
Nitraria billardierei	-34.9321	142.191	GBIF
Nitraria billardierei	-34.2254	142.017	GBIF
Nitraria billardierei	-35.5876	143.681	GBIF
Nitraria billardierei	-35.2747	143.082	GBIF
Nitraria billardierei	-35.1511	143.124	GBIF
Nitraria billardierei	-35.09	142.843	GBIF
Nitraria billardierei	-35.3016	143.005	GBIF
Nitraria billardierei	-35.2097	142.907	GBIF
Nitraria billardierei	-35.3288	142.869	GBIF
Nitraria billardierei	-34.7413	143.215	GBIF
Nitraria billardierei	-34.9441	142.871	GBIF
Nitraria billardierei	-34.158	141.897	GBIF
Nitraria billardierei	-34.24	141.287	GBIF
Nitraria billardierei	-34.2366	141.243	GBIF
Nitraria billardierei	-34.09	141.171	GBIF
Nitraria billardierei	-34.1955	141.125	GBIF
Nitraria billardierei	-34.1494	141.135	GBIF
Nitraria billardierei	-34.1936	141.167	GBIF
Nitraria billardierei	-34.1677	141.243	GBIF
Nitraria billardierei	-34.9511	141.476	GBIF
Nitraria billardierei	-34.6905	141.846	GBIF
Nitraria billardierei	-34.9172	142.03	GBIF
Nitraria billardierei	-34.8455	142.037	GBIF
Nitraria billardierei	-34.8538	142.145	GBIF
Nitraria billardierei	-34.865	142.143	GBIF
Nitraria billardierei	-34.898	142.142	GBIF
Nitraria billardierei	-34.8911	142.143	GBIF
Nitraria billardierei	-34.8933	142.268	GBIF
Nitraria billardierei	-34.87	142.247	GBIF
Nitraria billardierei	-34.688	142.894	GBIF
Nitraria billardierei	-34.6941	142.885	GBIF
Nitraria billardierei	-35.1955	142.401	GBIF
Nitraria billardierei	-35.9713	143.972	GBIF
Nitraria billardierei	-36.0069	144.421	GBIF
Nitraria billardierei	-34.4316	141.068	GBIF
Nitraria billardierei	-34.3819	141.104	GBIF
Nitraria billardierei	-35.6133	143.693	GBIF
Nitraria billardierei	-35.7347	143.744	GBIF
Nitraria billardierei	-35.9336	143.429	GBIF
Nitraria billardierei	-35.7208	143.913	GBIF
Nitraria billardierei	-35.5638	143.84	GBIF
Nitraria billardierei	-35.7716	143.588	GBIF
Nitraria billardierei	-35.7241	143.577	GBIF
Nitraria billardierei	-35.7997	143.538	GBIF
Nitraria billardierei	-35.6761	143.591	GBIF
Nitraria billardierei	-35.7138	143.417	GBIF
Nitraria billardierei	-35.723	143.539	GBIF
Nitraria billardierei	-35.8141	143.816	GBIF
Nitraria billardierei	-35.5686	143.761	GBIF
Nitraria billardierei	-35.698	143.619	GBIF
Nitraria billardierei	-35.6066	143.935	GBIF
Nitraria billardierei	-35.6061	143.93	GBIF
Nitraria billardierei	-35.6869	143.979	GBIF
Nitraria billardierei	-35.7975	143.599	GBIF
Nitraria billardierei	-35.9316	143.801	GBIF
Nitraria billardierei	-35.6733	143.838	GBIF
Nitraria billardierei	-35.8066	143.86	GBIF
Nitraria billardierei	-35.6066	143.718	GBIF
Nitraria billardierei	-35.2816	142.851	GBIF
Nitraria billardierei	-35.265	143.026	GBIF
Nitraria billardierei	-35.24	142.929	GBIF
Nitraria billardierei	-35.1816	143.118	GBIF
Nitraria billardierei	-34.9483	142.876	GBIF
Nitraria billardierei	-34.8066	142.721	GBIF
Nitraria billardierei	-34.7233	142.885	GBIF
Nitraria billardierei	-35.09	142.835	GBIF
Nitraria billardierei	-34.7983	142.085	GBIF
Nitraria billardierei	-34.6983	142.085	GBIF
Nitraria billardierei	-34.565	142.085	GBIF
Nitraria billardierei	-35.0316	141.701	GBIF
Nitraria billardierei	-34.9566	141.701	GBIF
Nitraria billardierei	-34.9483	141.635	GBIF
Nitraria billardierei	-34.1316	141.685	GBIF
Nitraria billardierei	-34.14	141.651	GBIF
Nitraria billardierei	-34.1761	141.635	GBIF
Nitraria billardierei	-34.2011	141.579	GBIF
Nitraria billardierei	-34.2233	141.185	GBIF
Nitraria billardierei	-34.1983	141.068	GBIF
Nitraria billardierei	-34.24	141.093	GBIF
Nitraria billardierei	-34.1816	141.201	GBIF
Nitraria billardierei	-34.1066	141.235	GBIF
Nitraria billardierei	-34.1983	141.026	GBIF
Nitraria billardierei	-34.14	141.243	GBIF
Nitraria billardierei	-34.0816	141.118	GBIF
Nitraria billardierei	-36.065	141.918	GBIF
Nitraria billardierei	-36.1494	142.958	GBIF
Nitraria billardierei	-35.3086	143.007	GBIF
Nitraria billardierei	-35.758	143.368	GBIF
Nitraria billardierei	-36.1916	143.125	GBIF
Nitraria billardierei	-35.5066	143.791	GBIF
Nitraria billardierei	-34.3561	142.03	GBIF
Nitraria billardierei	-35.8713	143.355	GBIF
Nitraria billardierei	-36.1016	142.723	GBIF
Nitraria billardierei	-36.0925	142.795	GBIF
Nitraria billardierei	-35.898	142.879	GBIF
Nitraria billardierei	-35.9494	142.901	GBIF
Nitraria billardierei	-36.0955	142.781	GBIF
Nitraria billardierei	-36.1027	142.781	GBIF
Nitraria billardierei	-36.0447	143.029	GBIF
Nitraria billardierei	-35.9341	142.886	GBIF
Nitraria billardierei	-36.1147	142.801	GBIF
Nitraria billardierei	-35.9297	142.882	GBIF
Nitraria billardierei	-36.0269	142.774	GBIF
Nitraria billardierei	-36.0172	142.833	GBIF
Nitraria billardierei	-36.005	142.865	GBIF
Nitraria billardierei	-35.9616	142.859	GBIF
Nitraria billardierei	-36.0416	142.933	GBIF
Nitraria billardierei	-35.1469	142.457	GBIF
Nitraria billardierei	-35.1352	142.443	GBIF
Nitraria billardierei	-35.0286	142.606	GBIF
Nitraria billardierei	-35.415	143.751	GBIF
Nitraria billardierei	-35.3608	143.562	GBIF
Nitraria billardierei	-34.273	141.583	GBIF
Nitraria billardierei	-36.0447	143.902	GBIF
Nitraria billardierei	-35.9044	141.971	GBIF
Nitraria billardierei	-35.5302	143.764	GBIF
Nitraria billardierei	-35.6636	143.637	GBIF
Nitraria billardierei	-35.6716	142.335	GBIF
Nitraria billardierei	-34.4725	142.238	GBIF
Nitraria billardierei	-35.3005	143.413	GBIF
Nitraria billardierei	-34.2252	142.017	GBIF
Nitraria billardierei	-35.2891	141.391	GBIF
Nitraria billardierei	-34.5566	141.048	GBIF
Nitraria billardierei	-35.183	142.924	GBIF
Nitraria billardierei	-35.1819	142.925	GBIF
Nitraria billardierei	-34.2322	142.125	GBIF
Nitraria billardierei	-34.2488	142.105	GBIF
Nitraria billardierei	-35.8816	144.151	GBIF
Nitraria billardierei	-35.865	144.085	GBIF
Nitraria billardierei	-35.8316	143.96	GBIF
Nitraria billardierei	-35.7316	143.935	GBIF
Nitraria billardierei	-35.5483	143.885	GBIF
Nitraria billardierei	-35.8066	143.951	GBIF
Nitraria billardierei	-35.7233	144.068	GBIF
Nitraria billardierei	-35.815	144.068	GBIF
Nitraria billardierei	-35.7066	144.076	GBIF
Nitraria billardierei	-35.715	143.935	GBIF
Nitraria billardierei	-35.2541	143.364	GBIF
Nitraria billardierei	-34.7183	141.664	GBIF
Nitraria billardierei	-34.7183	141.658	GBIF
Nitraria billardierei	-34.715	141.665	GBIF
Nitraria billardierei	-34.7188	141.651	GBIF
Nitraria billardierei	-34.7166	141.66	GBIF
Nitraria billardierei	-34.7136	141.658	GBIF
Nitraria billardierei	-34.7194	143.023	GBIF
Nitraria billardierei	-36.0394	142.291	GBIF
Nitraria billardierei	-34.1322	141.836	GBIF
Nitraria billardierei	-35.2308	141.393	GBIF
Nitraria billardierei	-35.228	141.427	GBIF
Nitraria billardierei	-35.08	142.274	GBIF
Nitraria billardierei	-35.0797	142.29	GBIF
Nitraria billardierei	-35.2219	143.453	GBIF
Nitraria billardierei	-35.7641	143.968	GBIF
Nitraria billardierei	-35.7525	143.949	GBIF
Nitraria billardierei	-35.7925	144.07	GBIF
Nitraria billardierei	-36.0944	142.783	GBIF
Nitraria billardierei	-34.61	142.393	GBIF
Nitraria billardierei	-35.5311	143.784	GBIF
Nitraria billardierei	-35.7319	144.066	GBIF
Nitraria billardierei	-36.1916	143.125	GBIF
Nitraria billardierei	-34.0927	141.271	GBIF
Nitraria billardierei	-34.083	141.294	GBIF
Nitraria billardierei	-34.4441	140.923	GBIF
Nitraria billardierei	-34.2594	141.334	GBIF
Nitraria billardierei	-34.1233	141.193	GBIF
Nitraria billardierei	-34.1919	141.085	GBIF
Nitraria billardierei	-34.2427	141.288	GBIF
Nitraria billardierei	-34.4297	141.075	GBIF
Nitraria billardierei	-34.3788	141.107	GBIF
Nitraria billardierei	-35.7688	143.589	GBIF
Nitraria billardierei	-35.9425	144.202	GBIF
Nitraria billardierei	-35.9425	144.202	GBIF
Nitraria billardierei	-35.61	144.023	GBIF
Nitraria billardierei	-35.5983	144.032	GBIF
Nitraria billardierei	-34.1169	141.008	GBIF
Nitraria billardierei	-34.1219	141.031	GBIF
Nitraria billardierei	-34.1233	141.017	GBIF
Nitraria billardierei	-34.1102	141.004	GBIF
Nitraria billardierei	-34.1197	141.014	GBIF
Nitraria billardierei	-35.1508	142.45	GBIF
Nitraria billardierei	-35.0294	142.599	GBIF
Nitraria billardierei	-34.8433	142.298	GBIF
Nitraria billardierei	-34.2063	142.091	GBIF
Nitraria billardierei	-34.1466	142.003	GBIF
Nitraria billardierei	-34.1452	142.006	GBIF
Nitraria billardierei	-34.1447	142.004	GBIF
Nitraria billardierei	-34.1461	142.001	GBIF
Nitraria billardierei	-34.1438	142.002	GBIF
Nitraria billardierei	-34.1436	141.998	GBIF
Nitraria billardierei	-34.1463	142.004	GBIF
Nitraria billardierei	-34.1458	141.999	GBIF
Nitraria billardierei	-34.1472	142.001	GBIF
Nitraria billardierei	-34.4227	142.33	GBIF
Nitraria billardierei	-34.4227	142.324	GBIF
Nitraria billardierei	-34.4316	142.306	GBIF
Nitraria billardierei	-34.4219	142.328	GBIF
Nitraria billardierei	-34.4147	142.329	GBIF
Nitraria billardierei	-34.4308	142.314	GBIF
Nitraria billardierei	-34.1905	142.129	GBIF
Nitraria billardierei	-34.1894	142.131	GBIF
Nitraria billardierei	-34.0461	141.324	GBIF
Nitraria billardierei	-34.0175	141.239	GBIF
Nitraria billardierei	-34.02	141.241	GBIF
Nitraria billardierei	-34.0305	141.255	GBIF
Nitraria billardierei	-34.0447	141.268	GBIF
Nitraria billardierei	-34.0563	141.31	GBIF
Nitraria billardierei	-34.0513	141.3	GBIF
Nitraria billardierei	-34.1772	141.41	GBIF
Nitraria billardierei	-34.1652	141.378	GBIF
Nitraria billardierei	-34.2019	141.469	GBIF
Nitraria billardierei	-34.205	141.476	GBIF
Nitraria billardierei	-34.2108	141.49	GBIF
Nitraria billardierei	-34.2191	141.513	GBIF
Nitraria billardierei	-34.2383	141.28	GBIF
Nitraria billardierei	-34.2441	141.29	GBIF
Nitraria billardierei	-34.2444	141.323	GBIF
Nitraria billardierei	-34.1722	141.338	GBIF
Nitraria billardierei	-34.385	142.233	GBIF
Nitraria billardierei	-34.2602	142.002	GBIF
Nitraria billardierei	-34.3852	142.233	GBIF
Nitraria billardierei	-34.3861	142.231	GBIF
Nitraria billardierei	-34.3861	142.231	GBIF
Nitraria billardierei	-34.2602	142.002	GBIF
Nitraria billardierei	-34.3105	142.106	GBIF
Nitraria billardierei	-34.3102	142.106	GBIF
Nitraria billardierei	-34.3119	142.105	GBIF
Nitraria billardierei	-34.3108	142.105	GBIF
Nitraria billardierei	-35.0438	143.213	GBIF
Nitraria billardierei	-35.0438	143.213	GBIF
Nitraria billardierei	-35.0436	143.214	GBIF
Nitraria billardierei	-35.0436	143.214	GBIF
Nitraria billardierei	-34.2613	141.596	GBIF
Nitraria billardierei	-34.2613	141.596	GBIF
Nitraria billardierei	-34.2613	141.596	GBIF
Nitraria billardierei	-34.2613	141.596	GBIF
Nitraria billardierei	-34.2611	141.595	GBIF
Nitraria billardierei	-35.1244	141.474	GBIF
Nitraria billardierei	-35.1244	141.474	GBIF
Nitraria billardierei	-35.1244	141.474	GBIF
Nitraria billardierei	-35.1247	141.474	GBIF
Nitraria billardierei	-35.4455	142.864	GBIF
Nitraria billardierei	-34.5597	141.993	GBIF
Nitraria billardierei	-34.558	141.994	GBIF
Nitraria billardierei	-34.558	141.994	GBIF
Nitraria billardierei	-34.5575	141.994	GBIF
Nitraria billardierei	-34.185	142.131	GBIF
Nitraria billardierei	-34.183	142.128	GBIF
Nitraria billardierei	-34.1438	141.215	GBIF
Nitraria billardierei	-34.17	141.187	GBIF
Nitraria billardierei	-34.1883	142.134	GBIF
Nitraria billardierei	-34.19	142.136	GBIF
Nitraria billardierei	-35.125	141.475	GBIF
Nitraria billardierei	-35.125	141.475	GBIF
Nitraria billardierei	-35.125	141.475	GBIF
Nitraria billardierei	-35.1244	141.475	GBIF
Nitraria billardierei	-35.125	141.475	GBIF
Nitraria billardierei	-35.125	141.475	GBIF
Nitraria billardierei	-34.8588	142.4	GBIF
Nitraria billardierei	-35.2222	141.426	GBIF
Nitraria billardierei	-35.223	141.426	GBIF
Nitraria billardierei	-35.22	141.425	GBIF
Nitraria billardierei	-34.2566	141.597	GBIF
Nitraria billardierei	-34.2458	141.609	GBIF
Nitraria billardierei	-34.243	141.609	GBIF
Nitraria billardierei	-34.245	141.609	GBIF
Nitraria billardierei	-34.438	142.223	GBIF
Nitraria billardierei	-34.4563	142.25	GBIF
Nitraria billardierei	-34.4705	142.235	GBIF
Nitraria billardierei	-34.4586	142.236	GBIF
Nitraria billardierei	-35.0438	143.214	GBIF
Nitraria billardierei	-35.0438	143.214	GBIF
Nitraria billardierei	-35.0438	143.214	GBIF
Nitraria billardierei	-35.0438	143.214	GBIF
Nitraria billardierei	-35.0438	143.214	GBIF
Nitraria billardierei	-35.0441	143.213	GBIF
Nitraria billardierei	-35.0438	143.214	GBIF
Nitraria billardierei	-35.0438	143.214	GBIF
Nitraria billardierei	-35.0438	143.214	GBIF
Nitraria billardierei	-35.0438	143.214	GBIF
Nitraria billardierei	-35.0455	143.214	GBIF
Nitraria billardierei	-35.0438	143.214	GBIF
Nitraria billardierei	-35.0436	143.213	GBIF
Nitraria billardierei	-34.3861	142.233	GBIF
Nitraria billardierei	-35.0438	143.214	GBIF
Nitraria billardierei	-35.0438	143.214	GBIF
Nitraria billardierei	-34.3111	142.106	GBIF
Nitraria billardierei	-35.0455	143.214	GBIF
Nitraria billardierei	-34.723	143.195	GBIF
Nitraria billardierei	-35.0438	143.214	GBIF
Nitraria billardierei	-29.1553	140.093	GBIF
Nitraria billardierei	-33.0157	137.123	GBIF
Nitraria billardierei	-33.0452	138.03	GBIF
Nitraria billardierei	-33.0178	138.052	GBIF
Nitraria billardierei	-27.0586	140.677	GBIF
Nitraria billardierei	-34.9095	137.18	GBIF
Nitraria billardierei	-33.2509	137.078	GBIF
Nitraria billardierei	-29.6225	147.02	GBIF
Nitraria billardierei	-29.9078	146.866	GBIF
Nitraria billardierei	-29.988	146.88	GBIF
Nitraria billardierei	-29.9314	146.862	GBIF
Nitraria billardierei	-29.9426	147.371	GBIF
Nitraria billardierei	-29.8366	146.914	GBIF
Nitraria billardierei	-29.8727	146.847	GBIF
Nitraria billardierei	-29.8507	146.845	GBIF
Nitraria billardierei	-29.9004	146.883	GBIF
Nitraria billardierei	-29.9155	146.916	GBIF
Nitraria billardierei	-29.7161	147.02	GBIF
Nitraria billardierei	-29.7014	146.953	GBIF
Nitraria billardierei	-29.7063	147.111	GBIF
Nitraria billardierei	-29.7952	146.958	GBIF
Nitraria billardierei	-29.7315	146.964	GBIF
Nitraria billardierei	-29.6783	147.037	GBIF
Nitraria billardierei	-29.7002	146.961	GBIF
Nitraria billardierei	-29.5319	146.984	GBIF
Nitraria billardierei	-29.3893	147.182	GBIF
Nitraria billardierei	-29.4368	147.134	GBIF
Nitraria billardierei	-29.3997	147.161	GBIF
Nitraria billardierei	-29.3636	146.935	GBIF
Nitraria billardierei	-29.5503	147.213	GBIF
Nitraria billardierei	-33.9312	143.545	GBIF
Nitraria billardierei	-33.8727	143.464	GBIF
Nitraria billardierei	-32.4526	141.394	GBIF
Nitraria billardierei	-31.5485	141.651	GBIF
Nitraria billardierei	-31.2818	141.601	GBIF
Nitraria billardierei	-31.5485	141.651	GBIF
Nitraria billardierei	-31.5485	141.651	GBIF
Nitraria billardierei	-31.2818	141.601	GBIF
Nitraria billardierei	-31.2818	141.601	GBIF
Nitraria billardierei	-34.757	143.503	GBIF
Nitraria billardierei	-29.9426	147.371	GBIF
Nitraria billardierei	-34.1894	143.311	GBIF
Nitraria billardierei	-34.208	143.225	GBIF
Nitraria billardierei	-34.4386	143.427	GBIF
Nitraria billardierei	-34.2665	143.241	GBIF
Nitraria billardierei	-34.2375	143.276	GBIF
Nitraria billardierei	-34.2667	143.275	GBIF
Nitraria billardierei	-34.2394	143.26	GBIF
Nitraria billardierei	-34.293	143.266	GBIF
Nitraria billardierei	-34.2911	143.258	GBIF
Nitraria billardierei	-34.4864	144.089	GBIF
Nitraria billardierei	-34.4236	143.944	GBIF
Nitraria billardierei	-34.5226	143.888	GBIF
Nitraria billardierei	-34.6198	143.742	GBIF
Nitraria billardierei	-34.6413	143.744	GBIF
Nitraria billardierei	-34.6332	143.826	GBIF
Nitraria billardierei	-34.5786	143.823	GBIF
Nitraria billardierei	-34.6257	143.787	GBIF
Nitraria billardierei	-34.6061	143.773	GBIF
Nitraria billardierei	-34.6099	143.764	GBIF
Nitraria billardierei	-34.3911	143.917	GBIF
Nitraria billardierei	-34.6061	143.773	GBIF
Nitraria billardierei	-34.6477	143.786	GBIF
Nitraria billardierei	-34.6239	143.9	GBIF
Nitraria billardierei	-34.6292	143.784	GBIF
Nitraria billardierei	-34.5875	143.769	GBIF
Nitraria billardierei	-34.6315	143.788	GBIF
Nitraria billardierei	-34.598	143.769	GBIF
Nitraria billardierei	-34.5731	143.885	GBIF
Nitraria billardierei	-34.5354	143.921	GBIF
Nitraria billardierei	-34.6112	143.811	GBIF
Nitraria billardierei	-34.6019	143.842	GBIF
Nitraria billardierei	-34.4118	143.911	GBIF
Nitraria billardierei	-35.2151	144.818	GBIF
Nitraria billardierei	-34.3818	145.035	GBIF
Nitraria billardierei	-33.8818	144.635	GBIF
Nitraria billardierei	-33.0151	145.001	GBIF
Nitraria billardierei	-34.4985	144.851	GBIF
Nitraria billardierei	-34.3651	144.268	GBIF
Nitraria billardierei	-34.0818	144.635	GBIF
Nitraria billardierei	-33.2818	141.601	GBIF
Nitraria billardierei	-33.4818	143.218	GBIF
Nitraria billardierei	-34.0985	141.918	GBIF
Nitraria billardierei	-34.0985	141.918	GBIF
Nitraria billardierei	-34.4152	143.501	GBIF
Nitraria billardierei	-34.0318	141.868	GBIF
Nitraria billardierei	-34.2485	143.001	GBIF
Nitraria billardierei	-34.5318	142.868	GBIF
Nitraria billardierei	-31.9652	141.451	GBIF
Nitraria billardierei	-31.9652	141.451	GBIF
Nitraria billardierei	-31.3652	141.618	GBIF
Nitraria billardierei	-31.6818	141.235	GBIF
Nitraria billardierei	-30.1984	148.151	GBIF
Nitraria billardierei	-31.4985	145.818	GBIF
Nitraria billardierei	-29.9151	146.851	GBIF
Nitraria billardierei	-29.9651	146.868	GBIF
Nitraria billardierei	-29.9651	146.868	GBIF
Nitraria billardierei	-29.9651	146.868	GBIF
Nitraria billardierei	-29.9651	146.868	GBIF
Nitraria billardierei	-30.0651	145.918	GBIF
Nitraria billardierei	-34.6652	143.568	GBIF
Nitraria billardierei	-29.9651	146.868	GBIF
Nitraria billardierei	-31.1818	147.418	GBIF
Nitraria billardierei	-34.5529	143.063	GBIF
Nitraria billardierei	-34.5985	144.418	GBIF
Nitraria billardierei	-35.0999	143.524	GBIF
Nitraria billardierei	-33.1618	142.397	GBIF
Nitraria billardierei	-34.614	144.488	GBIF
Nitraria billardierei	-29.9484	146.868	GBIF
Nitraria billardierei	-35.3985	144.201	GBIF
Nitraria billardierei	-35.2151	144.551	GBIF
Nitraria billardierei	-34.6667	144.167	GBIF
Nitraria billardierei	-35.5536	139.245	GBIF
Nitraria billardierei	-35.3073	139.192	GBIF
Nitraria billardierei	-35.432	139.364	GBIF
Nitraria billardierei	-35.5534	139.245	GBIF
Nitraria billardierei	-35.0508	139.365	GBIF
Nitraria billardierei	-33.4915	139.061	GBIF
Nitraria billardierei	-33.4922	139.06	GBIF
Nitraria billardierei	-33.2508	137.078	GBIF
Nitraria billardierei	-26.375	135.678	GBIF
Nitraria billardierei	-28.0389	138.211	GBIF
Nitraria billardierei	-27.8858	137.565	GBIF
Nitraria billardierei	-29.5	137.217	GBIF
Nitraria billardierei	-34.5486	136.268	GBIF
Nitraria billardierei	-31.9472	115.916	GBIF
Nitraria billardierei	-34.6216	139.478	GBIF
Nitraria billardierei	-34.1728	141.065	GBIF
Nitraria billardierei	-30.9802	139.107	GBIF
Nitraria billardierei	-30.9862	139.099	GBIF
Nitraria billardierei	-30.8894	139.487	GBIF
Nitraria billardierei	-31.6623	138.694	GBIF
Nitraria billardierei	-30.9017	139.184	GBIF
Nitraria billardierei	-31.6507	138.803	GBIF
Nitraria billardierei	-30.8821	139.484	GBIF
Nitraria billardierei	-32.6305	138.188	GBIF
Nitraria billardierei	-31.2703	138.867	GBIF
Nitraria billardierei	-31.5759	138.804	GBIF
Nitraria billardierei	-31.188	138.852	GBIF
Nitraria billardierei	-31.1455	138.96	GBIF
Nitraria billardierei	-26.4213	135.451	GBIF
Nitraria billardierei	-26.4477	135.386	GBIF
Nitraria billardierei	-33.9299	139.279	GBIF
Nitraria billardierei	-32.563	140.208	GBIF
Nitraria billardierei	-32.5705	140.118	GBIF
Nitraria billardierei	-32.8866	140.849	GBIF
Nitraria billardierei	-32.8811	140.842	GBIF
Nitraria billardierei	-32.5666	140.575	GBIF
Nitraria billardierei	-34.5815	138.579	GBIF
Nitraria billardierei	-33.0622	140.447	GBIF
Nitraria billardierei	-29.3998	139.985	GBIF
Nitraria billardierei	-33.8545	140.536	GBIF
Nitraria billardierei	-33.5408	140.453	GBIF
Nitraria billardierei	-33.5551	140.197	GBIF
Nitraria billardierei	-33.5814	140.082	GBIF
Nitraria billardierei	-33.5814	140.085	GBIF
Nitraria billardierei	-33.5413	140.029	GBIF
Nitraria billardierei	-33.417	140.176	GBIF
Nitraria billardierei	-33.4207	140.183	GBIF
Nitraria billardierei	-33.1072	139.792	GBIF
Nitraria billardierei	-29.3998	139.985	GBIF
Nitraria billardierei	-32.6708	139.903	GBIF
Nitraria billardierei	-32.6708	139.906	GBIF
Nitraria billardierei	-31.4824	131.267	GBIF
Nitraria billardierei	-31.4824	131.267	GBIF
Nitraria billardierei	-31.4824	131.267	GBIF
Nitraria billardierei	-31.4824	131.267	GBIF
Nitraria billardierei	-31.4824	131.267	GBIF
Nitraria billardierei	-31.4824	131.267	GBIF
Nitraria billardierei	-31.4824	131.267	GBIF
Nitraria billardierei	-31.4824	131.267	GBIF
Nitraria billardierei	-31.6262	129.109	GBIF
Nitraria billardierei	-31.6585	129.083	GBIF
Nitraria billardierei	-33.9041	140.92	GBIF
Nitraria billardierei	-33.8978	140.934	GBIF
Nitraria billardierei	-31.6585	129.083	GBIF
Nitraria billardierei	-31.6585	129.083	GBIF
Nitraria billardierei	-33.9428	140.897	GBIF
Nitraria billardierei	-31.6585	129.083	GBIF
Nitraria billardierei	-31.9525	127.274	GBIF
Nitraria billardierei	-32.224	127.441	GBIF
Nitraria billardierei	-32.0047	127.293	GBIF
Nitraria billardierei	-31.9008	128.261	GBIF
Nitraria billardierei	-31.9829	128.287	GBIF
Nitraria billardierei	-32.2759	136.242	GBIF
Nitraria billardierei	-31.7682	128.289	GBIF
Nitraria billardierei	-32.5999	136.01	GBIF
Nitraria billardierei	-32.5761	136.868	GBIF
Nitraria billardierei	-32.5767	136.872	GBIF
Nitraria billardierei	-32.5573	136.873	GBIF
Nitraria billardierei	-32.404	136.574	GBIF
Nitraria billardierei	-32.6184	136.869	GBIF
Nitraria billardierei	-32.5517	136.924	GBIF
Nitraria billardierei	-32.6483	136.332	GBIF
Nitraria billardierei	-31.4944	130.318	GBIF
Nitraria billardierei	-32.6165	136.396	GBIF
Nitraria billardierei	-32.5042	136.733	GBIF
Nitraria billardierei	-32.5752	136.924	GBIF
Nitraria billardierei	-31.4824	131.267	GBIF
Nitraria billardierei	-32.5748	136.928	GBIF
Nitraria billardierei	-31.4824	131.267	GBIF
Nitraria billardierei	-31.4824	131.267	GBIF
Nitraria billardierei	-31.4824	131.267	GBIF
Nitraria billardierei	-31.4824	131.267	GBIF
Nitraria billardierei	-31.4824	131.267	GBIF
Nitraria billardierei	-31.4824	131.267	GBIF
Nitraria billardierei	-31.9525	127.274	GBIF
Nitraria billardierei	-31.6585	129.083	GBIF
Nitraria billardierei	-31.7682	128.289	GBIF
Nitraria billardierei	-32.224	127.441	GBIF
Nitraria billardierei	-31.6585	129.083	GBIF
Nitraria billardierei	-31.5835	130.39	GBIF
Nitraria billardierei	-31.0289	126.035	GBIF
Nitraria billardierei	-31.0116	126.088	GBIF
Nitraria billardierei	-31.6585	129.083	GBIF
Nitraria billardierei	-31.9829	128.287	GBIF
Nitraria billardierei	-31.9008	128.261	GBIF
Nitraria billardierei	-31.0287	126.085	GBIF
Nitraria billardierei	-31.0287	126.085	GBIF
Nitraria billardierei	-31.0116	126.088	GBIF
Nitraria billardierei	-31.4198	130.828	GBIF
Nitraria billardierei	-32.0724	123.995	GBIF
Nitraria billardierei	-31.5835	130.39	GBIF
Nitraria billardierei	-32.242	124.098	GBIF
Nitraria billardierei	-31.5835	130.39	GBIF
Nitraria billardierei	-35.231	136.068	GBIF
Nitraria billardierei	-35.2354	136.071	GBIF
Nitraria billardierei	-32.242	124.098	GBIF
Nitraria billardierei	-31.4198	130.828	GBIF
Nitraria billardierei	-32.0724	123.995	GBIF
Nitraria billardierei	-32.3043	133.597	GBIF
Nitraria billardierei	-32.306	133.587	GBIF
Nitraria billardierei	-32.306	133.589	GBIF
Nitraria billardierei	-32.2442	133.626	GBIF
Nitraria billardierei	-32.3059	133.584	GBIF
Nitraria billardierei	-32.5093	133.254	GBIF
Nitraria billardierei	-34.4908	136.285	GBIF
Nitraria billardierei	-32.5083	133.251	GBIF
Nitraria billardierei	-34.4909	136.281	GBIF
Nitraria billardierei	-34.4918	136.282	GBIF
Nitraria billardierei	-32.5102	133.254	GBIF
Nitraria billardierei	-32.5083	133.252	GBIF
Nitraria billardierei	-34.6404	135.382	GBIF
Nitraria billardierei	-32.5074	133.25	GBIF
Nitraria billardierei	-32.5074	133.254	GBIF
Nitraria billardierei	-32.5119	133.252	GBIF
Nitraria billardierei	-32.4509	133.637	GBIF
Nitraria billardierei	-32.4581	133.644	GBIF
Nitraria billardierei	-32.511	133.253	GBIF
Nitraria billardierei	-34.4881	136.283	GBIF
Nitraria billardierei	-32.4526	133.629	GBIF
Nitraria billardierei	-35.0324	135.983	GBIF
Nitraria billardierei	-34.4567	137.363	GBIF
Nitraria billardierei	-32.4599	133.637	GBIF
Nitraria billardierei	-35.0239	135.977	GBIF
Nitraria billardierei	-32.4616	133.635	GBIF
Nitraria billardierei	-34.4873	136.281	GBIF
Nitraria billardierei	-32.4544	133.633	GBIF
Nitraria billardierei	-32.4581	133.642	GBIF
Nitraria billardierei	-34.489	136.283	GBIF
Nitraria billardierei	-35.0279	135.977	GBIF
Nitraria billardierei	-35.0302	135.977	GBIF
Nitraria billardierei	-32.4617	133.637	GBIF
Nitraria billardierei	-34.4917	136.283	GBIF
Nitraria billardierei	-32.4599	133.639	GBIF
Nitraria billardierei	-32.4526	133.635	GBIF
Nitraria billardierei	-32.5084	133.254	GBIF
Nitraria billardierei	-33.7461	134.287	GBIF
Nitraria billardierei	-34.4917	136.286	GBIF
Nitraria billardierei	-32.4579	133.627	GBIF
Nitraria billardierei	-33.7452	134.285	GBIF
Nitraria billardierei	-32.458	133.635	GBIF
Nitraria billardierei	-34.4873	136.282	GBIF
Nitraria billardierei	-35.0347	135.977	GBIF
Nitraria billardierei	-32.4599	133.635	GBIF
Nitraria billardierei	-32.4546	133.648	GBIF
Nitraria billardierei	-32.4544	133.631	GBIF
Nitraria billardierei	-34.646	136.185	GBIF
Nitraria billardierei	-33.7406	134.283	GBIF
Nitraria billardierei	-32.4599	133.642	GBIF
Nitraria billardierei	-32.4545	133.637	GBIF
Nitraria billardierei	-35.9008	136.536	GBIF
Nitraria billardierei	-32.5128	133.251	GBIF
Nitraria billardierei	-32.4562	133.629	GBIF
Nitraria billardierei	-33.7451	134.283	GBIF
Nitraria billardierei	-32.4526	133.637	GBIF
Nitraria billardierei	-33.7452	134.287	GBIF
Nitraria billardierei	-32.4543	133.627	GBIF
Nitraria billardierei	-32.4562	133.635	GBIF
Nitraria billardierei	-32.4581	133.637	GBIF
Nitraria billardierei	-32.4545	133.646	GBIF
Nitraria billardierei	-32.4598	133.633	GBIF
Nitraria billardierei	-32.4544	133.635	GBIF
Nitraria billardierei	-32.4528	133.65	GBIF
Nitraria billardierei	-34.412	136.141	GBIF
Nitraria billardierei	-32.4562	133.627	GBIF
Nitraria billardierei	-32.458	133.633	GBIF
Nitraria billardierei	-32.4562	133.633	GBIF
Nitraria billardierei	-32.4544	133.629	GBIF
Nitraria billardierei	-32.4528	133.652	GBIF
Nitraria billardierei	-33.7461	134.286	GBIF
Nitraria billardierei	-33.7424	134.283	GBIF
Nitraria billardierei	-33.7442	134.283	GBIF
Nitraria billardierei	-33.9844	137.539	GBIF
Nitraria billardierei	-32.4526	133.633	GBIF
Nitraria billardierei	-33.7388	134.282	GBIF
Nitraria billardierei	-34.4093	136.137	GBIF
Nitraria billardierei	-32.4526	133.631	GBIF
Nitraria billardierei	-33.7461	134.287	GBIF
Nitraria billardierei	-33.9835	137.537	GBIF
Nitraria billardierei	-32.4546	133.65	GBIF
Nitraria billardierei	-35.115	137.827	GBIF
Nitraria billardierei	-33.7442	134.283	GBIF
Nitraria billardierei	-33.7452	134.286	GBIF
Nitraria billardierei	-34.8981	135.854	GBIF
Nitraria billardierei	-33.7443	134.285	GBIF
Nitraria billardierei	-35.115	137.828	GBIF
Nitraria billardierei	-35.1161	137.83	GBIF
Nitraria billardierei	-35.1174	137.83	GBIF
Nitraria billardierei	-35.1183	137.831	GBIF
Nitraria billardierei	-35.115	137.83	GBIF
Nitraria billardierei	-35.116	137.831	GBIF
Nitraria billardierei	-33.7146	134.622	GBIF
Nitraria billardierei	-33.7128	134.622	GBIF
Nitraria billardierei	-33.7164	134.623	GBIF
Nitraria billardierei	-33.7128	134.623	GBIF
Nitraria billardierei	-33.711	134.622	GBIF
Nitraria billardierei	-34.9472	135.871	GBIF
Nitraria billardierei	-34.5944	135.374	GBIF
Nitraria billardierei	-34.5953	135.375	GBIF
Nitraria billardierei	-34.5958	135.375	GBIF
Nitraria billardierei	-34.5953	135.375	GBIF
Nitraria billardierei	-32.374	138.149	GBIF
Nitraria billardierei	-32.355	138.156	GBIF
Nitraria billardierei	-32.2712	138.162	GBIF
Nitraria billardierei	-32.5024	133.279	GBIF
Nitraria billardierei	-32.2653	138.117	GBIF
Nitraria billardierei	-32.5042	133.279	GBIF
Nitraria billardierei	-32.2672	138.109	GBIF
Nitraria billardierei	-32.4969	133.275	GBIF
Nitraria billardierei	-32.5005	133.277	GBIF
Nitraria billardierei	-32.5097	133.283	GBIF
Nitraria billardierei	-32.4989	133.288	GBIF
Nitraria billardierei	-32.5023	133.275	GBIF
Nitraria billardierei	-32.5206	133.289	GBIF
Nitraria billardierei	-32.5168	133.281	GBIF
Nitraria billardierei	-32.5188	133.292	GBIF
Nitraria billardierei	-32.5062	133.296	GBIF
Nitraria billardierei	-32.5023	133.277	GBIF
Nitraria billardierei	-32.4988	133.279	GBIF
Nitraria billardierei	-35.3355	136.119	GBIF
Nitraria billardierei	-35.3355	136.122	GBIF
Nitraria billardierei	-35.2304	136.832	GBIF
Nitraria billardierei	-34.7834	135.034	GBIF
Nitraria billardierei	-34.7851	135.036	GBIF
Nitraria billardierei	-34.7838	135.033	GBIF
Nitraria billardierei	-34.7864	135.032	GBIF
Nitraria billardierei	-34.9454	135.87	GBIF
Nitraria billardierei	-34.9472	135.87	GBIF
Nitraria billardierei	-34.9462	135.872	GBIF
Nitraria billardierei	-34.9463	135.87	GBIF
Nitraria billardierei	-34.9444	135.872	GBIF
Nitraria billardierei	-34.9445	135.87	GBIF
Nitraria billardierei	-34.986	136.028	GBIF
Nitraria billardierei	-34.986	136.029	GBIF
Nitraria billardierei	-34.6469	136.184	GBIF
Nitraria billardierei	-34.6442	136.183	GBIF
Nitraria billardierei	-34.6478	136.185	GBIF
Nitraria billardierei	-35.3385	136.92	GBIF
Nitraria billardierei	-35.3386	136.919	GBIF
Nitraria billardierei	-34.5924	136.319	GBIF
Nitraria billardierei	-35.1951	136.84	GBIF
Nitraria billardierei	-35.1947	136.839	GBIF
Nitraria billardierei	-35.3385	136.921	GBIF
Nitraria billardierei	-35.3385	136.92	GBIF
Nitraria billardierei	-35.1947	136.84	GBIF
Nitraria billardierei	-34.5897	136.319	GBIF
Nitraria billardierei	-34.5943	136.311	GBIF
Nitraria billardierei	-34.5933	136.311	GBIF
Nitraria billardierei	-34.5906	136.314	GBIF
Nitraria billardierei	-35.1947	136.839	GBIF
Nitraria billardierei	-34.5959	136.321	GBIF
Nitraria billardierei	-34.5933	136.315	GBIF
Nitraria billardierei	-34.5941	136.326	GBIF
Nitraria billardierei	-34.5897	136.318	GBIF
Nitraria billardierei	-34.5896	136.324	GBIF
Nitraria billardierei	-34.5923	136.327	GBIF
Nitraria billardierei	-34.5933	136.312	GBIF
Nitraria billardierei	-34.5906	136.312	GBIF
Nitraria billardierei	-34.6054	135.983	GBIF
Nitraria billardierei	-32.269	133.227	GBIF
Nitraria billardierei	-32.269	133.228	GBIF
Nitraria billardierei	-34.7056	135.289	GBIF
Nitraria billardierei	-32.2699	133.231	GBIF
Nitraria billardierei	-32.2672	133.231	GBIF
Nitraria billardierei	-34.7074	135.289	GBIF
Nitraria billardierei	-32.2681	133.23	GBIF
Nitraria billardierei	-34.7274	135.157	GBIF
Nitraria billardierei	-34.7056	135.292	GBIF
Nitraria billardierei	-32.6943	134.279	GBIF
Nitraria billardierei	-32.6952	134.279	GBIF
Nitraria billardierei	-32.2708	133.229	GBIF
Nitraria billardierei	-34.6226	135.431	GBIF
Nitraria billardierei	-34.7092	135.289	GBIF
Nitraria billardierei	-34.7279	135.156	GBIF
Nitraria billardierei	-34.6226	135.432	GBIF
Nitraria billardierei	-32.2663	133.232	GBIF
Nitraria billardierei	-32.2681	133.231	GBIF
Nitraria billardierei	-32.269	133.23	GBIF
Nitraria billardierei	-32.2672	133.229	GBIF
Nitraria billardierei	-32.2681	133.228	GBIF
Nitraria billardierei	-34.7216	135.165	GBIF
Nitraria billardierei	-32.2699	133.227	GBIF
Nitraria billardierei	-32.6943	134.278	GBIF
Nitraria billardierei	-32.2699	133.23	GBIF
Nitraria billardierei	-32.6952	134.278	GBIF
Nitraria billardierei	-34.7319	135.157	GBIF
Nitraria billardierei	-34.7319	135.156	GBIF
Nitraria billardierei	-34.73	135.158	GBIF
Nitraria billardierei	-34.7274	135.155	GBIF
Nitraria billardierei	-34.7288	135.159	GBIF
Nitraria billardierei	-34.7327	135.154	GBIF
Nitraria billardierei	-34.7269	135.156	GBIF
Nitraria billardierei	-34.727	135.155	GBIF
Nitraria billardierei	-32.2926	133.525	GBIF
Nitraria billardierei	-33.961	134.265	GBIF
Nitraria billardierei	-34.5245	136.252	GBIF
Nitraria billardierei	-34.5218	136.253	GBIF
Nitraria billardierei	-34.5226	136.26	GBIF
Nitraria billardierei	-34.5263	136.257	GBIF
Nitraria billardierei	-34.5236	136.257	GBIF
Nitraria billardierei	-32.721	133.966	GBIF
Nitraria billardierei	-33.9755	134.263	GBIF
Nitraria billardierei	-32.721	133.969	GBIF
Nitraria billardierei	-34.8595	136.009	GBIF
Nitraria billardierei	-32.721	133.967	GBIF
Nitraria billardierei	-32.7201	133.967	GBIF
Nitraria billardierei	-32.7228	133.968	GBIF
Nitraria billardierei	-34.8586	136.008	GBIF
Nitraria billardierei	-33.9768	134.265	GBIF
Nitraria billardierei	-32.721	133.968	GBIF
Nitraria billardierei	-34.8577	136.009	GBIF
Nitraria billardierei	-32.7219	133.966	GBIF
Nitraria billardierei	-32.7219	133.967	GBIF
Nitraria billardierei	-32.721	133.969	GBIF
Nitraria billardierei	-34.8586	136.009	GBIF
Nitraria billardierei	-34.5218	136.259	GBIF
Nitraria billardierei	-32.7219	133.968	GBIF
Nitraria billardierei	-35.2323	136.065	GBIF
Nitraria billardierei	-34.7555	135.042	GBIF
Nitraria billardierei	-34.9381	135.873	GBIF
Nitraria billardierei	-34.7582	135.039	GBIF
Nitraria billardierei	-34.939	135.873	GBIF
Nitraria billardierei	-34.7591	135.041	GBIF
Nitraria billardierei	-32.5603	133.294	GBIF
Nitraria billardierei	-34.7573	135.041	GBIF
Nitraria billardierei	-35.1222	136.469	GBIF
Nitraria billardierei	-34.7573	135.044	GBIF
Nitraria billardierei	-34.7564	135.044	GBIF
Nitraria billardierei	-36.0664	136.702	GBIF
Nitraria billardierei	-34.7573	135.042	GBIF
Nitraria billardierei	-34.7591	135.04	GBIF
Nitraria billardierei	-34.9372	135.873	GBIF
Nitraria billardierei	-32.5603	133.292	GBIF
Nitraria billardierei	-32.562	133.29	GBIF
Nitraria billardierei	-32.5584	133.288	GBIF
Nitraria billardierei	-34.5128	136.252	GBIF
Nitraria billardierei	-32.5639	133.29	GBIF
Nitraria billardierei	-32.5657	133.29	GBIF
Nitraria billardierei	-32.5637	133.277	GBIF
Nitraria billardierei	-34.5137	136.252	GBIF
Nitraria billardierei	-34.5124	136.25	GBIF
Nitraria billardierei	-34.5434	136.261	GBIF
Nitraria billardierei	-32.2709	133.37	GBIF
Nitraria billardierei	-34.5434	136.26	GBIF
Nitraria billardierei	-32.2691	133.371	GBIF
Nitraria billardierei	-32.2709	133.369	GBIF
Nitraria billardierei	-34.2643	136.266	GBIF
Nitraria billardierei	-34.4533	137.367	GBIF
Nitraria billardierei	-32.2691	133.372	GBIF
Nitraria billardierei	-34.983	135.619	GBIF
Nitraria billardierei	-34.9847	135.624	GBIF
Nitraria billardierei	-34.992	135.618	GBIF
Nitraria billardierei	-34.9902	135.623	GBIF
Nitraria billardierei	-34.9884	135.622	GBIF
Nitraria billardierei	-34.5083	136.25	GBIF
Nitraria billardierei	-34.992	135.622	GBIF
Nitraria billardierei	-34.9829	135.625	GBIF
Nitraria billardierei	-34.9901	135.624	GBIF
Nitraria billardierei	-34.9812	135.617	GBIF
Nitraria billardierei	-34.9829	135.624	GBIF
Nitraria billardierei	-34.983	135.622	GBIF
Nitraria billardierei	-34.9902	135.617	GBIF
Nitraria billardierei	-34.9848	135.622	GBIF
Nitraria billardierei	-34.9847	135.625	GBIF
Nitraria billardierei	-34.983	135.618	GBIF
Nitraria billardierei	-34.9847	135.623	GBIF
Nitraria billardierei	-34.9812	135.617	GBIF
Nitraria billardierei	-34.992	135.619	GBIF
Nitraria billardierei	-34.9902	135.619	GBIF
Nitraria billardierei	-34.9884	135.623	GBIF
Nitraria billardierei	-34.9576	136.03	GBIF
Nitraria billardierei	-34.9549	136.031	GBIF
Nitraria billardierei	-34.9567	136.03	GBIF
Nitraria billardierei	-34.9812	135.619	GBIF
Nitraria billardierei	-34.5932	136.26	GBIF
Nitraria billardierei	-32.3944	133.369	GBIF
Nitraria billardierei	-34.9848	135.622	GBIF
Nitraria billardierei	-34.983	135.623	GBIF
Nitraria billardierei	-34.9549	136.03	GBIF
Nitraria billardierei	-34.5948	136.255	GBIF
Nitraria billardierei	-32.3955	133.38	GBIF
Nitraria billardierei	-34.5957	136.254	GBIF
Nitraria billardierei	-34.5967	136.25	GBIF
Nitraria billardierei	-34.9558	136.031	GBIF
Nitraria billardierei	-32.3972	133.377	GBIF
Nitraria billardierei	-34.552	136.21	GBIF
Nitraria billardierei	-34.5483	136.216	GBIF
Nitraria billardierei	-33.1864	134.364	GBIF
Nitraria billardierei	-33.1864	134.365	GBIF
Nitraria billardierei	-33.1855	134.365	GBIF
Nitraria billardierei	-34.4431	137.412	GBIF
Nitraria billardierei	-34.4427	137.413	GBIF
Nitraria billardierei	-34.4435	137.413	GBIF
Nitraria billardierei	-33.1693	134.605	GBIF
Nitraria billardierei	-34.9664	136.064	GBIF
Nitraria billardierei	-34.5792	136.288	GBIF
Nitraria billardierei	-34.5817	136.3	GBIF
Nitraria billardierei	-34.5791	136.292	GBIF
Nitraria billardierei	-34.5782	136.293	GBIF
Nitraria billardierei	-34.5809	136.291	GBIF
Nitraria billardierei	-34.5809	136.292	GBIF
Nitraria billardierei	-34.5809	136.293	GBIF
Nitraria billardierei	-35.3216	136.907	GBIF
Nitraria billardierei	-34.58	136.29	GBIF
Nitraria billardierei	-34.9641	136.058	GBIF
Nitraria billardierei	-34.5818	136.295	GBIF
Nitraria billardierei	-34.5782	136.29	GBIF
Nitraria billardierei	-34.9056	136.035	GBIF
Nitraria billardierei	-35.3225	136.907	GBIF
Nitraria billardierei	-34.5773	136.291	GBIF
Nitraria billardierei	-34.5791	136.294	GBIF
Nitraria billardierei	-34.9125	136.033	GBIF
Nitraria billardierei	-34.5791	136.289	GBIF
Nitraria billardierei	-34.5817	136.299	GBIF
Nitraria billardierei	-34.5791	136.29	GBIF
Nitraria billardierei	-34.58	136.289	GBIF
Nitraria billardierei	-34.4558	137.365	GBIF
Nitraria billardierei	-34.7027	135.331	GBIF
Nitraria billardierei	-34.4463	137.364	GBIF
Nitraria billardierei	-34.7009	135.334	GBIF
Nitraria billardierei	-34.4463	137.364	GBIF
Nitraria billardierei	-34.7009	135.33	GBIF
Nitraria billardierei	-34.7019	135.328	GBIF
Nitraria billardierei	-34.7018	135.331	GBIF
Nitraria billardierei	-32.3196	133.519	GBIF
Nitraria billardierei	-34.7019	135.329	GBIF
Nitraria billardierei	-34.7009	135.327	GBIF
Nitraria billardierei	-34.4618	137.404	GBIF
Nitraria billardierei	-34.7018	135.33	GBIF
Nitraria billardierei	-34.7018	135.333	GBIF
Nitraria billardierei	-34.618	135.468	GBIF
Nitraria billardierei	-34.7009	135.328	GBIF
Nitraria billardierei	-34.7009	135.331	GBIF
Nitraria billardierei	-34.7018	135.331	GBIF
Nitraria billardierei	-32.4843	133.346	GBIF
Nitraria billardierei	-32.4798	133.347	GBIF
Nitraria billardierei	-34.618	135.469	GBIF
Nitraria billardierei	-32.5809	133.282	GBIF
Nitraria billardierei	-34.7019	135.327	GBIF
Nitraria billardierei	-34.7009	135.333	GBIF
Nitraria billardierei	-34.7009	135.327	GBIF
Nitraria billardierei	-34.7009	135.332	GBIF
Nitraria billardierei	-32.4807	133.345	GBIF
Nitraria billardierei	-34.7	135.334	GBIF
Nitraria billardierei	-32.4807	133.344	GBIF
Nitraria billardierei	-32.5837	133.288	GBIF
Nitraria billardierei	-32.5827	133.28	GBIF
Nitraria billardierei	-32.5872	133.28	GBIF
Nitraria billardierei	-32.5818	133.281	GBIF
Nitraria billardierei	-32.5846	133.288	GBIF
Nitraria billardierei	-32.5809	133.283	GBIF
Nitraria billardierei	-32.5836	133.279	GBIF
Nitraria billardierei	-32.5837	133.287	GBIF
Nitraria billardierei	-32.3622	133.794	GBIF
Nitraria billardierei	-32.3637	133.804	GBIF
Nitraria billardierei	-32.3614	133.794	GBIF
Nitraria billardierei	-32.3742	133.479	GBIF
Nitraria billardierei	-32.3769	133.479	GBIF
Nitraria billardierei	-32.3814	133.48	GBIF
Nitraria billardierei	-32.3796	133.484	GBIF
Nitraria billardierei	-32.3815	133.484	GBIF
Nitraria billardierei	-32.376	133.479	GBIF
Nitraria billardierei	-32.3646	133.804	GBIF
Nitraria billardierei	-32.3778	133.48	GBIF
Nitraria billardierei	-32.3751	133.479	GBIF
Nitraria billardierei	-32.3814	133.479	GBIF
Nitraria billardierei	-32.3742	133.481	GBIF
Nitraria billardierei	-32.3742	133.48	GBIF
Nitraria billardierei	-32.3561	133.807	GBIF
Nitraria billardierei	-32.3778	133.484	GBIF
Nitraria billardierei	-32.3627	133.793	GBIF
Nitraria billardierei	-32.3724	133.485	GBIF
Nitraria billardierei	-32.3706	133.482	GBIF
Nitraria billardierei	-32.3814	133.482	GBIF
Nitraria billardierei	-32.3814	133.483	GBIF
Nitraria billardierei	-32.3814	133.477	GBIF
Nitraria billardierei	-32.4767	133.316	GBIF
Nitraria billardierei	-32.3706	133.483	GBIF
Nitraria billardierei	-32.3778	133.483	GBIF
Nitraria billardierei	-32.3814	133.481	GBIF
Nitraria billardierei	-32.3805	133.484	GBIF
Nitraria billardierei	-32.678	134.265	GBIF
Nitraria billardierei	-32.678	134.263	GBIF
Nitraria billardierei	-32.678	134.268	GBIF
Nitraria billardierei	-32.6798	134.265	GBIF
Nitraria billardierei	-32.6762	134.265	GBIF
Nitraria billardierei	-32.4723	133.32	GBIF
Nitraria billardierei	-32.678	134.27	GBIF
Nitraria billardierei	-32.678	134.272	GBIF
Nitraria billardierei	-32.4457	133.665	GBIF
Nitraria billardierei	-32.4458	133.669	GBIF
Nitraria billardierei	-32.4422	133.674	GBIF
Nitraria billardierei	-32.4422	133.676	GBIF
Nitraria billardierei	-32.4439	133.663	GBIF
Nitraria billardierei	-32.444	133.667	GBIF
Nitraria billardierei	-32.4387	133.678	GBIF
Nitraria billardierei	-32.4439	133.665	GBIF
Nitraria billardierei	-32.4476	133.667	GBIF
Nitraria billardierei	-32.4404	133.676	GBIF
Nitraria billardierei	-32.4386	133.67	GBIF
Nitraria billardierei	-34.5343	135.429	GBIF
Nitraria billardierei	-32.4493	133.663	GBIF
Nitraria billardierei	-32.4368	133.678	GBIF
Nitraria billardierei	-32.4493	133.665	GBIF
Nitraria billardierei	-32.4458	133.667	GBIF
Nitraria billardierei	-32.4457	133.663	GBIF
Nitraria billardierei	-32.4422	133.672	GBIF
Nitraria billardierei	-32.4458	133.672	GBIF
Nitraria billardierei	-32.4404	133.674	GBIF
Nitraria billardierei	-32.4493	133.661	GBIF
Nitraria billardierei	-32.4475	133.663	GBIF
Nitraria billardierei	-32.4475	133.665	GBIF
Nitraria billardierei	-33.9875	137.548	GBIF
Nitraria billardierei	-34.0083	134.245	GBIF
Nitraria billardierei	-34.0014	134.238	GBIF
Nitraria billardierei	-32.4832	133.332	GBIF
Nitraria billardierei	-32.486	133.333	GBIF
Nitraria billardierei	-35.2892	136.917	GBIF
Nitraria billardierei	-32.4851	133.333	GBIF
Nitraria billardierei	-32.4842	133.333	GBIF
Nitraria billardierei	-35.2888	136.918	GBIF
Nitraria billardierei	-35.2892	136.918	GBIF
Nitraria billardierei	-32.4833	133.334	GBIF
Nitraria billardierei	-35.289	136.918	GBIF
Nitraria billardierei	-32.4878	133.333	GBIF
Nitraria billardierei	-32.4833	133.335	GBIF
Nitraria billardierei	-34.5644	136.237	GBIF
Nitraria billardierei	-32.4878	133.337	GBIF
Nitraria billardierei	-32.4842	133.334	GBIF
Nitraria billardierei	-32.486	133.334	GBIF
Nitraria billardierei	-32.4842	133.335	GBIF
Nitraria billardierei	-34.5626	136.238	GBIF
Nitraria billardierei	-32.4833	133.336	GBIF
Nitraria billardierei	-32.4977	133.334	GBIF
Nitraria billardierei	-32.4851	133.334	GBIF
Nitraria billardierei	-35.2888	136.918	GBIF
Nitraria billardierei	-32.4851	133.332	GBIF
Nitraria billardierei	-32.4833	133.333	GBIF
Nitraria billardierei	-32.4869	133.334	GBIF
Nitraria billardierei	-32.4896	133.336	GBIF
Nitraria billardierei	-34.7743	135.03	GBIF
Nitraria billardierei	-34.7751	135.03	GBIF
Nitraria billardierei	-34.7755	135.03	GBIF
Nitraria billardierei	-34.7763	135.03	GBIF
Nitraria billardierei	-34.7734	135.029	GBIF
Nitraria billardierei	-35.6255	137.644	GBIF
Nitraria billardierei	-35.6226	137.651	GBIF
Nitraria billardierei	-34.6486	136.366	GBIF
Nitraria billardierei	-35.37	136.862	GBIF
Nitraria billardierei	-34.5674	136.293	GBIF
Nitraria billardierei	-35.3699	136.846	GBIF
Nitraria billardierei	-35.3701	136.859	GBIF
Nitraria billardierei	-34.6477	136.368	GBIF
Nitraria billardierei	-35.37	136.866	GBIF
Nitraria billardierei	-35.3718	136.862	GBIF
Nitraria billardierei	-35.3718	136.866	GBIF
Nitraria billardierei	-35.37	136.864	GBIF
Nitraria billardierei	-35.3717	136.862	GBIF
Nitraria billardierei	-33.9456	135.118	GBIF
Nitraria billardierei	-35.3699	136.847	GBIF
Nitraria billardierei	-29.3998	139.985	GBIF
Nitraria billardierei	-33.8929	137.68	GBIF
Nitraria billardierei	-34.1607	137.534	GBIF
Nitraria billardierei	-34.3084	138.32	GBIF
Nitraria billardierei	-29.4603	139.973	GBIF
Nitraria billardierei	-29.4396	139.979	GBIF
Nitraria billardierei	-29.398	139.976	GBIF
Nitraria billardierei	-31.4825	131.266	GBIF
Nitraria billardierei	-31.4963	131.265	GBIF
Nitraria billardierei	-29.4529	136.859	GBIF
Nitraria billardierei	-34.3326	139.386	GBIF
Nitraria billardierei	-34.3026	139.412	GBIF
Nitraria billardierei	-34.0249	139.639	GBIF
Nitraria billardierei	-34.2873	139.357	GBIF
Nitraria billardierei	-34.2315	139.393	GBIF
Nitraria billardierei	-34.1821	139.412	GBIF
Nitraria billardierei	-34.0364	139.637	GBIF
Nitraria billardierei	-34.5354	136.277	GBIF
Nitraria billardierei	-34.5215	136.277	GBIF
Nitraria billardierei	-34.5401	136.28	GBIF
Nitraria billardierei	-34.6712	136.339	GBIF
Nitraria billardierei	-26.565	138.017	GBIF
Nitraria billardierei	-34.2423	136.264	GBIF
Nitraria billardierei	-27.0586	140.677	GBIF
Nitraria billardierei	-32.0847	133.531	GBIF
Nitraria billardierei	-31.9419	133.244	GBIF
Nitraria billardierei	-31.8448	132.345	GBIF
Nitraria billardierei	-31.8404	132.618	GBIF
Nitraria billardierei	-27.1278	137.559	GBIF
Nitraria billardierei	-33.3264	137.241	GBIF
Nitraria billardierei	-32.3863	135.257	GBIF
Nitraria billardierei	-31.5563	131.442	GBIF
Nitraria billardierei	-31.544	131.425	GBIF
Nitraria billardierei	-31.3795	131.684	GBIF
Nitraria billardierei	-31.3971	131.723	GBIF
Nitraria billardierei	-31.302	131.691	GBIF
Nitraria billardierei	-31.3141	131.675	GBIF
Nitraria billardierei	-31.4118	131.197	GBIF
Nitraria billardierei	-31.4255	131.177	GBIF
Nitraria billardierei	-31.4104	131.17	GBIF
Nitraria billardierei	-31.3964	131.143	GBIF
Nitraria billardierei	-31.3868	131.18	GBIF
Nitraria billardierei	-31.3903	131.233	GBIF
Nitraria billardierei	-31.345	130.945	GBIF
Nitraria billardierei	-31.4176	131.183	GBIF
Nitraria billardierei	-31.3804	130.971	GBIF
Nitraria billardierei	-31.4236	131.174	GBIF
Nitraria billardierei	-31.4002	131.182	GBIF
Nitraria billardierei	-31.3823	131.26	GBIF
Nitraria billardierei	-31.4069	131.155	GBIF
Nitraria billardierei	-31.9709	132.402	GBIF
Nitraria billardierei	-31.9171	132.339	GBIF
Nitraria billardierei	-31.9132	132.331	GBIF
Nitraria billardierei	-31.1378	132.078	GBIF
Nitraria billardierei	-28.5387	138.71	GBIF
Nitraria billardierei	-34.6513	138.466	GBIF
Nitraria billardierei	-34.6535	138.446	GBIF
Nitraria billardierei	-34.6563	138.47	GBIF
Nitraria billardierei	-34.6606	138.459	GBIF
Nitraria billardierei	-34.6557	138.46	GBIF
Nitraria billardierei	-27.5657	137.465	GBIF
Nitraria billardierei	-29.336	140.007	GBIF
Nitraria billardierei	-29.3998	139.985	GBIF
Nitraria billardierei	-29.4459	139.977	GBIF
Nitraria billardierei	-29.5467	139.943	GBIF
Nitraria billardierei	-31.555	131.953	GBIF
Nitraria billardierei	-31.3725	131.615	GBIF
Nitraria billardierei	-31.2196	131.308	GBIF
Nitraria billardierei	-31.4185	130.75	GBIF
Nitraria billardierei	-29.4969	139.926	GBIF
Nitraria billardierei	-31.9068	132.415	GBIF
Nitraria billardierei	-27.6895	135.382	GBIF
Nitraria billardierei	-27.5878	135.433	GBIF
Nitraria billardierei	-28.182	135.314	GBIF
Nitraria billardierei	-28.2147	135.262	GBIF
Nitraria billardierei	-27.9331	136.45	GBIF
Nitraria billardierei	-27.9838	136.392	GBIF
Nitraria billardierei	-27.9743	136.364	GBIF
Nitraria billardierei	-27.9716	136.327	GBIF
Nitraria billardierei	-27.9598	136.311	GBIF
Nitraria billardierei	-26.4495	135.392	GBIF
Nitraria billardierei	-26.4482	135.387	GBIF
Nitraria billardierei	-32.9158	134.154	GBIF
Nitraria billardierei	-32.9129	134.155	GBIF
Nitraria billardierei	-33.0168	134.142	GBIF
Nitraria billardierei	-32.7307	134.066	GBIF
Nitraria billardierei	-32.7175	134.095	GBIF
Nitraria billardierei	-32.7234	134.06	GBIF
Nitraria billardierei	-32.7416	134.074	GBIF
Nitraria billardierei	-32.8902	134.176	GBIF
Nitraria billardierei	-32.871	134.102	GBIF
Nitraria billardierei	-32.8864	134.078	GBIF
Nitraria billardierei	-32.7494	134.087	GBIF
Nitraria billardierei	-32.9245	134.077	GBIF
Nitraria billardierei	-33.0486	134.181	GBIF
Nitraria billardierei	-32.9091	134.061	GBIF
Nitraria billardierei	-32.9398	134.139	GBIF
Nitraria billardierei	-32.948	134.194	GBIF
Nitraria billardierei	-33.153	134.26	GBIF
Nitraria billardierei	-33.0341	134.204	GBIF
Nitraria billardierei	-33.1487	134.362	GBIF
Nitraria billardierei	-33.8828	123.634	GBIF
Nitraria billardierei	-33.4831	138.615	GBIF
Nitraria billardierei	-33.5959	138.393	GBIF
Nitraria billardierei	-33.6195	138.294	GBIF
Nitraria billardierei	-33.8864	123.636	GBIF
Nitraria billardierei	-33.0033	138.479	GBIF
Nitraria billardierei	-34.4023	137.456	GBIF
Nitraria billardierei	-33.8869	123.638	GBIF
Nitraria billardierei	-34.1352	138.075	GBIF
Nitraria billardierei	-33.8864	123.638	GBIF
Nitraria billardierei	-33.8864	123.64	GBIF
Nitraria billardierei	-33.4084	137.888	GBIF
Nitraria billardierei	-33.8864	123.642	GBIF
Nitraria billardierei	-33.8864	123.641	GBIF
Nitraria billardierei	-26.4231	135.513	GBIF
Nitraria billardierei	-26.4228	135.524	GBIF
Nitraria billardierei	-26.4098	135.521	GBIF
Nitraria billardierei	-26.4245	135.512	GBIF
Nitraria billardierei	-26.4239	135.514	GBIF
Nitraria billardierei	-26.4088	135.519	GBIF
Nitraria billardierei	-26.4081	135.519	GBIF
Nitraria billardierei	-26.409	135.521	GBIF
Nitraria billardierei	-33.4742	136.681	GBIF
Nitraria billardierei	-33.4739	136.679	GBIF
Nitraria billardierei	-33.6316	136.945	GBIF
Nitraria billardierei	-29.3261	137.014	GBIF
Nitraria billardierei	-32.4862	133.308	GBIF
Nitraria billardierei	-34.1326	139.671	GBIF
Nitraria billardierei	-34.9402	139.248	GBIF
Nitraria billardierei	-32.5046	133.293	GBIF
Nitraria billardierei	-32.5624	133.282	GBIF
Nitraria billardierei	-32.4982	133.288	GBIF
Nitraria billardierei	-29.3998	139.985	GBIF
Nitraria billardierei	-33.9176	136.559	GBIF
Nitraria billardierei	-35.3353	136.118	GBIF
Nitraria billardierei	-31.6061	129.777	GBIF
Nitraria billardierei	-31.5656	130.222	GBIF
Nitraria billardierei	-31.5655	130.252	GBIF
Nitraria billardierei	-32.1585	133.391	GBIF
Nitraria billardierei	-32.6081	137.848	GBIF
Nitraria billardierei	-35.3665	136.861	GBIF
Nitraria billardierei	-35.3711	136.864	GBIF
Nitraria billardierei	-35.3716	136.86	GBIF
Nitraria billardierei	-35.3702	136.859	GBIF
Nitraria billardierei	-27.8054	138.246	GBIF
Nitraria billardierei	-27.8036	138.245	GBIF
Nitraria billardierei	-27.8966	137.896	GBIF
Nitraria billardierei	-27.8944	137.74	GBIF
Nitraria billardierei	-27.9072	137.798	GBIF
Nitraria billardierei	-27.886	137.82	GBIF
Nitraria billardierei	-28.8629	138.099	GBIF
Nitraria billardierei	-29.0202	138.106	GBIF
Nitraria billardierei	-28.8501	138.201	GBIF
Nitraria billardierei	-29.0787	137.672	GBIF
Nitraria billardierei	-29.1737	137.461	GBIF
Nitraria billardierei	-29.0216	137.68	GBIF
Nitraria billardierei	-29.1627	137.534	GBIF
Nitraria billardierei	-29.1503	137.552	GBIF
Nitraria billardierei	-29.0225	137.677	GBIF
Nitraria billardierei	-31.4987	131.279	GBIF
Nitraria billardierei	-31.5441	131.42	GBIF
Nitraria billardierei	-31.5225	131.337	GBIF
Nitraria billardierei	-31.5015	131.274	GBIF
Nitraria billardierei	-31.5459	131.398	GBIF
Nitraria billardierei	-31.5456	131.417	GBIF
Nitraria billardierei	-31.5846	131.474	GBIF
Nitraria billardierei	-31.5033	131.273	GBIF
Nitraria billardierei	-31.5858	131.473	GBIF
Nitraria billardierei	-29.3998	139.985	GBIF
Nitraria billardierei	-33.2318	134.664	GBIF
Nitraria billardierei	-32.7505	134.094	GBIF
Nitraria billardierei	-29.3998	139.985	GBIF
Nitraria billardierei	-26.0363	137.595	GBIF
Nitraria billardierei	-33.4338	136.846	GBIF
Nitraria billardierei	-33.8007	136.807	GBIF
Nitraria billardierei	-33.9334	136.545	GBIF
Nitraria billardierei	-33.8062	136.692	GBIF
Nitraria billardierei	-33.5975	137.236	GBIF
Nitraria billardierei	-33.7071	136.737	GBIF
Nitraria billardierei	-33.4553	136.708	GBIF
Nitraria billardierei	-32.9078	136.91	GBIF
Nitraria billardierei	-32.7743	137.083	GBIF
Nitraria billardierei	-29.3998	139.985	GBIF
Nitraria billardierei	-29.4969	139.926	GBIF
Nitraria billardierei	-29.3998	139.985	GBIF
Nitraria billardierei	-26.5821	137.746	GBIF
Nitraria billardierei	-26.3558	138.158	GBIF
Nitraria billardierei	-26.4726	138.187	GBIF
Nitraria billardierei	-26.3599	138.159	GBIF
Nitraria billardierei	-31.9485	132.689	GBIF
Nitraria billardierei	-32.465	133.857	GBIF
Nitraria billardierei	-30.548	138.481	GBIF
Nitraria billardierei	-35.345	139.123	GBIF
Nitraria billardierei	-34.6991	139.485	GBIF
Nitraria billardierei	-29.4969	139.926	GBIF
Nitraria billardierei	-29.3998	139.985	GBIF
Nitraria billardierei	-30.573	138.42	GBIF
Nitraria billardierei	-30.7643	138.12	GBIF
Nitraria billardierei	-26.574	137.288	GBIF
Nitraria billardierei	-34.1925	135.31	GBIF
Nitraria billardierei	-34.8826	138.483	GBIF
Nitraria billardierei	-34.4964	138.296	GBIF
Nitraria billardierei	-34.5429	138.346	GBIF
Nitraria billardierei	-34.448	138.261	GBIF
Nitraria billardierei	-35.3547	138.43	GBIF
Nitraria billardierei	-34.2586	139.365	GBIF
Nitraria billardierei	-34.2642	135.345	GBIF
Nitraria billardierei	-35.1683	137.3	GBIF
Nitraria billardierei	-35.2337	137.176	GBIF
Nitraria billardierei	-35.1678	137.299	GBIF
Nitraria billardierei	-34.3892	137.958	GBIF
Nitraria billardierei	-34.362	137.995	GBIF
Nitraria billardierei	-34.9188	137.12	GBIF
Nitraria billardierei	-34.9033	137.234	GBIF
Nitraria billardierei	-34.7409	137.479	GBIF
Nitraria billardierei	-34.4045	137.446	GBIF
Nitraria billardierei	-34.3533	137.483	GBIF
Nitraria billardierei	-34.0344	137.566	GBIF
Nitraria billardierei	-29.3998	139.985	GBIF
Nitraria billardierei	-29.3998	139.985	GBIF
Nitraria billardierei	-33.4042	137.876	GBIF
Nitraria billardierei	-29.3998	139.985	GBIF
Nitraria billardierei	-29.3998	139.985	GBIF
Nitraria billardierei	-29.3998	139.985	GBIF
Nitraria billardierei	-32.9571	137.682	GBIF
Nitraria billardierei	-34.4565	138.271	GBIF
Nitraria billardierei	-34.4771	138.272	GBIF
Nitraria billardierei	-32.5079	137.805	GBIF
Nitraria billardierei	-32.9642	137.981	GBIF
Nitraria billardierei	-32.2457	138.271	GBIF
Nitraria billardierei	-32.5247	138.796	GBIF
Nitraria billardierei	-32.5627	138.786	GBIF
Nitraria billardierei	-29.1033	139.277	GBIF
Nitraria billardierei	-32.5548	138.848	GBIF
Nitraria billardierei	-32.5142	138.796	GBIF
Nitraria billardierei	-32.5529	138.836	GBIF
Nitraria billardierei	-32.5578	138.85	GBIF
Nitraria billardierei	-32.6303	138.581	GBIF
Nitraria billardierei	-32.6493	138.81	GBIF
Nitraria billardierei	-32.7137	138.699	GBIF
Nitraria billardierei	-32.5708	138.739	GBIF
Nitraria billardierei	-32.0921	138.294	GBIF
Nitraria billardierei	-32.1256	138.163	GBIF
Nitraria billardierei	-27.7832	135.662	GBIF
Nitraria billardierei	-27.7664	135.639	GBIF
Nitraria billardierei	-32.6853	137.899	GBIF
Nitraria billardierei	-32.7134	137.881	GBIF
Nitraria billardierei	-32.8767	137.926	GBIF
Nitraria billardierei	-34.027	138.359	GBIF
Nitraria billardierei	-32.9322	137.969	GBIF
Nitraria billardierei	-33.9715	138.337	GBIF
Nitraria billardierei	-33.8335	138.306	GBIF
Nitraria billardierei	-33.8318	138.304	GBIF
Nitraria billardierei	-34.4945	138.399	GBIF
Nitraria billardierei	-34.4479	138.346	GBIF
Nitraria billardierei	-34.7191	138.544	GBIF
Nitraria billardierei	-34.4952	138.424	GBIF
Nitraria billardierei	-34.4648	138.291	GBIF
Nitraria billardierei	-34.6468	138.464	GBIF
Nitraria billardierei	-34.6071	138.413	GBIF
Nitraria billardierei	-31.8232	138.259	GBIF
Nitraria billardierei	-32.4404	138.887	GBIF
Nitraria billardierei	-32.6498	139.401	GBIF
Nitraria billardierei	-32.6424	139.303	GBIF
Nitraria billardierei	-32.9721	137.776	GBIF
Nitraria billardierei	-32.9574	137.682	GBIF
Nitraria billardierei	-32.9076	137.753	GBIF
Nitraria billardierei	-32.9564	137.682	GBIF
Nitraria billardierei	-32.9139	137.752	GBIF
Nitraria billardierei	-32.9071	137.758	GBIF
Nitraria billardierei	-33.7833	136.883	GBIF
Nitraria billardierei	-33.7217	137.012	GBIF
Nitraria billardierei	-29.3699	136.625	GBIF
Nitraria billardierei	-29.3808	137.135	GBIF
Nitraria billardierei	-28.4176	136.447	GBIF
Nitraria billardierei	-33.371	137.385	GBIF
Nitraria billardierei	-33.7233	136.989	GBIF
Nitraria billardierei	-32.0047	127.293	GBIF
Nitraria billardierei	-31.0289	126.035	GBIF
Nitraria billardierei	-32.3778	133.481	GBIF
Nitraria billardierei	-35.068	136.183	GBIF
Nitraria billardierei	-32.5798	136.919	GBIF
Nitraria billardierei	-31.6585	129.083	GBIF
Nitraria billardierei	-31.4944	130.318	GBIF
Nitraria billardierei	-27.6983	135.857	GBIF
Nitraria billardierei	-27.7638	136.681	GBIF
Nitraria billardierei	-28.2981	135.518	GBIF
Nitraria billardierei	-28.184	135.295	GBIF
Nitraria billardierei	-32.3518	140.115	GBIF
Nitraria billardierei	-32.0961	140.921	GBIF
Nitraria billardierei	-32.1635	139.172	GBIF
Nitraria billardierei	-32.1355	139.261	GBIF
Nitraria billardierei	-29.4469	137.045	GBIF
Nitraria billardierei	-29.3749	137.103	GBIF
Nitraria billardierei	-29.3791	137.125	GBIF
Nitraria billardierei	-29.3763	137.117	GBIF
Nitraria billardierei	-28.422	136.449	GBIF
Nitraria billardierei	-28.1453	136.028	GBIF
Nitraria billardierei	-28.4423	136.126	GBIF
Nitraria billardierei	-28.948	136.781	GBIF
Nitraria billardierei	-28.4248	136.15	GBIF
Nitraria billardierei	-29.4469	137.045	GBIF
Nitraria billardierei	-29.3763	137.117	GBIF
Nitraria billardierei	-29.3749	137.103	GBIF
Nitraria billardierei	-29.3791	137.125	GBIF
Nitraria billardierei	-32.0241	132.215	GBIF
Nitraria billardierei	-31.4738	131.117	GBIF
Nitraria billardierei	-31.4689	131.123	GBIF
Nitraria billardierei	-31.4644	131.132	GBIF
Nitraria billardierei	-31.4989	131.276	GBIF
Nitraria billardierei	-31.5011	131.272	GBIF
Nitraria billardierei	-31.5032	131.273	GBIF
Nitraria billardierei	-31.8602	131.979	GBIF
Nitraria billardierei	-31.9013	132.046	GBIF
Nitraria billardierei	-31.9912	132.144	GBIF
Nitraria billardierei	-32.3922	138.205	GBIF
Nitraria billardierei	-32.0269	132.202	GBIF
Nitraria billardierei	-29.5937	137.403	GBIF
Nitraria billardierei	-28.951	136.782	GBIF
Nitraria billardierei	-28.9254	136.787	GBIF
Nitraria billardierei	-28.4182	136.151	GBIF
Nitraria billardierei	-28.4256	136.149	GBIF
Nitraria billardierei	-28.0486	136.049	GBIF
Nitraria billardierei	-28.1453	136.028	GBIF
Nitraria billardierei	-28.4534	136.391	GBIF
Nitraria billardierei	-28.4513	136.463	GBIF
Nitraria billardierei	-28.4837	136.482	GBIF
Nitraria billardierei	-31.5302	131.354	GBIF
Nitraria billardierei	-31.532	131.345	GBIF
Nitraria billardierei	-31.6056	130.792	GBIF
Nitraria billardierei	-31.605	130.788	GBIF
Nitraria billardierei	-31.6052	130.755	GBIF
Nitraria billardierei	-31.6018	130.737	GBIF
Nitraria billardierei	-31.6071	129.775	GBIF
Nitraria billardierei	-31.6171	129.607	GBIF
Nitraria billardierei	-31.6851	129.012	GBIF
Nitraria billardierei	-31.6631	129.119	GBIF
Nitraria billardierei	-32.8813	134.085	GBIF
Nitraria billardierei	-32.9096	134.065	GBIF
Nitraria billardierei	-32.8837	134.078	GBIF
Nitraria billardierei	-33.1108	134.263	GBIF
Nitraria billardierei	-32.1425	133.58	GBIF
Nitraria billardierei	-32.1686	133.547	GBIF
Nitraria billardierei	-32.1956	133.728	GBIF
Nitraria billardierei	-32.136	133.58	GBIF
Nitraria billardierei	-32.5311	133.861	GBIF
Nitraria billardierei	-32.1945	133.715	GBIF
Nitraria billardierei	-32.1983	133.699	GBIF
Nitraria billardierei	-32.0051	132.385	GBIF
Nitraria billardierei	-32.0082	132.449	GBIF
Nitraria billardierei	-32.4674	134.02	GBIF
Nitraria billardierei	-31.9747	132.814	GBIF
Nitraria billardierei	-31.5761	130.233	GBIF
Nitraria billardierei	-31.5864	130.074	GBIF
Nitraria billardierei	-31.586	130.073	GBIF
Nitraria billardierei	-31.9515	132.664	GBIF
Nitraria billardierei	-31.5767	130.166	GBIF
Nitraria billardierei	-31.643	129.353	GBIF
Nitraria billardierei	-32.7182	134.101	GBIF
Nitraria billardierei	-32.027	132.311	GBIF
Nitraria billardierei	-32.7229	134.061	GBIF
Nitraria billardierei	-31.9397	132.505	GBIF
Nitraria billardierei	-31.9383	132.504	GBIF
Nitraria billardierei	-32.0227	132.471	GBIF
Nitraria billardierei	-32.0243	132.47	GBIF
Nitraria billardierei	-31.6653	129.148	GBIF
Nitraria billardierei	-32.0129	132.443	GBIF
Nitraria billardierei	-31.665	129.147	GBIF
Nitraria billardierei	-31.6469	129.296	GBIF
Nitraria billardierei	-31.6502	129.289	GBIF
Nitraria billardierei	-33.6242	134.836	GBIF
Nitraria billardierei	-32.7973	134.127	GBIF
Nitraria billardierei	-33.2624	134.713	GBIF
Nitraria billardierei	-33.3272	134.803	GBIF
Nitraria billardierei	-32.4954	133.853	GBIF
Nitraria billardierei	-32.5014	133.854	GBIF
Nitraria billardierei	-29.1352	136.568	GBIF
Nitraria billardierei	-29.3709	136.624	GBIF
Nitraria billardierei	-26.3596	135.705	GBIF
Nitraria billardierei	-34.174	136.144	GBIF
Nitraria billardierei	-29.1227	136.299	GBIF
Nitraria billardierei	-29.0552	136.267	GBIF
Nitraria billardierei	-29.0316	136.269	GBIF
Nitraria billardierei	-32.2918	139.73	GBIF
Nitraria billardierei	-32.0906	139.158	GBIF
Nitraria billardierei	-32.1635	139.172	GBIF
Nitraria billardierei	-31.7137	139.085	GBIF
Nitraria billardierei	-32.0804	139.204	GBIF
Nitraria billardierei	-32.2984	139.431	GBIF
Nitraria billardierei	-32.0165	139.117	GBIF
Nitraria billardierei	-31.3464	139.223	GBIF
Nitraria billardierei	-32.3724	139.052	GBIF
Nitraria billardierei	-31.5674	139.128	GBIF
Nitraria billardierei	-31.3109	139.203	GBIF
Nitraria billardierei	-30.1147	140.123	GBIF
Nitraria billardierei	-30.9129	140.191	GBIF
Nitraria billardierei	-30.8308	140.032	GBIF
Nitraria billardierei	-31.4831	139.35	GBIF
Nitraria billardierei	-31.5101	139.244	GBIF
Nitraria billardierei	-31.2141	139.321	GBIF
Nitraria billardierei	-32.4785	139.538	GBIF
Nitraria billardierei	-31.5034	139.38	GBIF
Nitraria billardierei	-32.4785	139.538	GBIF
Nitraria billardierei	-32.3126	139.625	GBIF
Nitraria billardierei	-32.1985	139.714	GBIF
Nitraria billardierei	-32.1288	139.661	GBIF
Nitraria billardierei	-32.202	139.718	GBIF
Nitraria billardierei	-32.0767	139.632	GBIF
Nitraria billardierei	-32.066	139.613	GBIF
Nitraria billardierei	-32.4669	139.97	GBIF
Nitraria billardierei	-32.4855	139.956	GBIF
Nitraria billardierei	-31.1558	140.13	GBIF
Nitraria billardierei	-32.4574	140.763	GBIF
Nitraria billardierei	-32.0961	140.921	GBIF
Nitraria billardierei	-32.4087	140.071	GBIF
Nitraria billardierei	-32.343	140.291	GBIF
Nitraria billardierei	-32.3518	140.115	GBIF
Nitraria billardierei	-29.6384	137.808	GBIF
Nitraria billardierei	-29.6437	137.778	GBIF
Nitraria billardierei	-29.9854	138.231	GBIF
Nitraria billardierei	-27.3233	138.622	GBIF
Nitraria billardierei	-27.7221	138.905	GBIF
Nitraria billardierei	-27.7226	138.795	GBIF
Nitraria billardierei	-31.58	132.867	GBIF
Nitraria billardierei	-26.4271	135.494	GBIF
Nitraria billardierei	-26.4316	135.49	GBIF
Nitraria billardierei	-29.9843	138.231	GBIF
Nitraria billardierei	-29.1347	138.4	GBIF
Nitraria billardierei	-33.6707	139.095	GBIF
Nitraria billardierei	-33.682	139.157	GBIF
Nitraria billardierei	-33.4588	137.974	GBIF
Nitraria billardierei	-33.3915	137.876	GBIF
Nitraria billardierei	-33.8506	137.694	GBIF
Nitraria billardierei	-33.3802	137.978	GBIF
Nitraria billardierei	-33.9396	137.602	GBIF
Nitraria billardierei	-33.9776	137.56	GBIF
Nitraria billardierei	-33.8005	137.739	GBIF
Nitraria billardierei	-33.908	137.637	GBIF
Nitraria billardierei	-33.8644	137.679	GBIF
Nitraria billardierei	-34.1277	138.163	GBIF
Nitraria billardierei	-34.009	137.54	GBIF
Nitraria billardierei	-34.0214	137.669	GBIF
Nitraria billardierei	-34.3855	137.526	GBIF
Nitraria billardierei	-34.361	137.996	GBIF
Nitraria billardierei	-34.2688	138.153	GBIF
Nitraria billardierei	-34.2839	138.223	GBIF
Nitraria billardierei	-35.0895	137.631	GBIF
Nitraria billardierei	-34.5388	137.526	GBIF
Nitraria billardierei	-34.6857	137.516	GBIF
Nitraria billardierei	-29.3998	139.985	GBIF
Nitraria billardierei	-32.3639	138.081	GBIF
Nitraria billardierei	-34.4972	137.365	GBIF
Nitraria billardierei	-35.3726	136.845	GBIF
Nitraria billardierei	-34.5623	135.212	GBIF
Nitraria billardierei	-32.4865	133.308	GBIF
Nitraria billardierei	-37.0909	139.722	GBIF
Nitraria billardierei	-34.4533	137.366	GBIF
Nitraria billardierei	-34.6615	136.344	GBIF
Nitraria billardierei	-34.6375	136.196	GBIF
Nitraria billardierei	-33.5937	134.759	GBIF
Nitraria billardierei	-34.5541	138.571	GBIF
Nitraria billardierei	-29.3998	139.985	GBIF
Nitraria billardierei	-27.309	133.612	GBIF
Nitraria billardierei	-27.3061	133.59	GBIF
Nitraria billardierei	-32.3424	138.052	GBIF
Nitraria billardierei	-32.3663	138.118	GBIF
Nitraria billardierei	-32.4558	138.189	GBIF
Nitraria billardierei	-34.0683	137.609	GBIF
Nitraria billardierei	-33.9997	137.617	GBIF
Nitraria billardierei	-34.5138	139.376	GBIF
Nitraria billardierei	-33.1935	138.036	GBIF
Nitraria billardierei	-33.7634	138.272	GBIF
Nitraria billardierei	-34.1772	138.163	GBIF
Nitraria billardierei	-32.5569	138.193	GBIF
Nitraria billardierei	-32.5244	138.186	GBIF
Nitraria billardierei	-29.3872	139.979	GBIF
Nitraria billardierei	-30.9402	139.195	GBIF
Nitraria billardierei	-30.9549	139.217	GBIF
Nitraria billardierei	-30.7162	139.081	GBIF
Nitraria billardierei	-30.9057	139.179	GBIF
Nitraria billardierei	-30.9784	139.105	GBIF
Nitraria billardierei	-30.9628	139.12	GBIF
Nitraria billardierei	-31.5071	138.951	GBIF
Nitraria billardierei	-31.5108	138.957	GBIF
Nitraria billardierei	-31.2953	138.824	GBIF
Nitraria billardierei	-31.302	138.82	GBIF
Nitraria billardierei	-31.3411	138.95	GBIF
Nitraria billardierei	-31.2535	138.942	GBIF
Nitraria billardierei	-31.4775	138.932	GBIF
Nitraria billardierei	-31.4143	138.987	GBIF
Nitraria billardierei	-31.4665	138.924	GBIF
Nitraria billardierei	-30.8704	139.488	GBIF
Nitraria billardierei	-30.955	139.471	GBIF
Nitraria billardierei	-31.2096	138.257	GBIF
Nitraria billardierei	-34.3708	136.1	GBIF
Nitraria billardierei	-34.37	136.099	GBIF
Nitraria billardierei	-34.3473	136.102	GBIF
Nitraria billardierei	-34.3584	136.1	GBIF
Nitraria billardierei	-34.3388	136.103	GBIF
Nitraria billardierei	-34.3543	136.101	GBIF
Nitraria billardierei	-34.3473	136.102	GBIF
Nitraria billardierei	-34.37	136.099	GBIF
Nitraria billardierei	-34.367	136.099	GBIF
Nitraria billardierei	-34.3388	136.103	GBIF
Nitraria billardierei	-34.3619	136.1	GBIF
Nitraria billardierei	-34.5346	137.615	GBIF
Nitraria billardierei	-34.5963	137.875	GBIF
Nitraria billardierei	-34.4553	137.567	GBIF
Nitraria billardierei	-34.3271	137.865	GBIF
Nitraria billardierei	-34.5904	137.874	GBIF
Nitraria billardierei	-34.5963	137.875	GBIF
Nitraria billardierei	-34.4552	137.581	GBIF
Nitraria billardierei	-34.6032	137.877	GBIF
Nitraria billardierei	-34.4553	137.577	GBIF
Nitraria billardierei	-34.5568	137.511	GBIF
Nitraria billardierei	-34.5863	137.523	GBIF
Nitraria billardierei	-34.5349	137.497	GBIF
Nitraria billardierei	-34.595	137.512	GBIF
Nitraria billardierei	-34.5607	137.512	GBIF
Nitraria billardierei	-34.6172	137.54	GBIF
Nitraria billardierei	-34.5861	137.523	GBIF
Nitraria billardierei	-34.5608	137.511	GBIF
Nitraria billardierei	-34.481	137.6	GBIF
Nitraria billardierei	-34.481	137.577	GBIF
Nitraria billardierei	-34.4808	137.62	GBIF
Nitraria billardierei	-34.481	137.521	GBIF
Nitraria billardierei	-34.481	137.572	GBIF
Nitraria billardierei	-34.481	137.537	GBIF
Nitraria billardierei	-34.4808	137.577	GBIF
Nitraria billardierei	-34.4808	137.6	GBIF
Nitraria billardierei	-34.4808	137.537	GBIF
Nitraria billardierei	-34.4552	137.592	GBIF
Nitraria billardierei	-34.4808	137.521	GBIF
Nitraria billardierei	-34.5111	137.874	GBIF
Nitraria billardierei	-34.5115	137.86	GBIF
Nitraria billardierei	-34.5109	137.874	GBIF
Nitraria billardierei	-34.5115	137.609	GBIF
Nitraria billardierei	-34.3948	137.494	GBIF
Nitraria billardierei	-34.3832	137.547	GBIF
Nitraria billardierei	-34.383	137.553	GBIF
Nitraria billardierei	-34.3832	137.553	GBIF
Nitraria billardierei	-34.3834	137.547	GBIF
Nitraria billardierei	-34.2278	135.729	GBIF
Nitraria billardierei	-32.0575	138.435	GBIF
Nitraria billardierei	-32.0577	138.435	GBIF
Nitraria billardierei	-31.8139	138.278	GBIF
Nitraria billardierei	-31.8137	138.278	GBIF
Nitraria billardierei	-34.1316	137.613	GBIF
Nitraria billardierei	-34.2263	138	GBIF
Nitraria billardierei	-34.1948	137.534	GBIF
Nitraria billardierei	-34.1946	137.534	GBIF
Nitraria billardierei	-34.1968	137.547	GBIF
Nitraria billardierei	-34.1931	137.524	GBIF
Nitraria billardierei	-34.1954	137.538	GBIF
Nitraria billardierei	-34.1929	137.524	GBIF
Nitraria billardierei	-34.2339	137.52	GBIF
Nitraria billardierei	-34.3227	137.497	GBIF
Nitraria billardierei	-34.2937	137.522	GBIF
Nitraria billardierei	-34.2114	137.559	GBIF
Nitraria billardierei	-34.1791	137.709	GBIF
Nitraria billardierei	-34.1983	137.708	GBIF
Nitraria billardierei	-34.1984	137.708	GBIF
Nitraria billardierei	-34.1124	137.59	GBIF
Nitraria billardierei	-34.635	135.687	GBIF
Nitraria billardierei	-34.6286	135.679	GBIF
Nitraria billardierei	-34.1815	137.727	GBIF
Nitraria billardierei	-34.182	137.725	GBIF
Nitraria billardierei	-34.1316	137.607	GBIF
Nitraria billardierei	-34.279	137.97	GBIF
Nitraria billardierei	-34.1708	138.003	GBIF
Nitraria billardierei	-34.1448	138.008	GBIF
Nitraria billardierei	-34.1896	137.999	GBIF
[truncated: 3,903 more rows]
