# Supplementary material for: A novel approach to study the morphology and chemistry of pollen in a phylogenetic context, applied to the halophytic taxon Nitraria L.(Nitrariaceae)
Source: PeerJ. 2018 Jul 19;6:e5055. doi: 10.7717/peerj.5055 (PMC6054868; doi:10.7717/peerj.5055)
Supplement: Supplemental Information 1 [file peerj-06-5055-s005.xlsx]

## Sheet: ReadMe
Woutersen et al. Pollen morphology and pollen chemistry as identifiers of Nitrariaceae and implications for historical records of the steppe–desert taxon Nitraria
To run the accompanying R code, save both the FTIR_spectralData and Morphology_characterCodings worksheets as tab delimited .txt files in your R working directory
Morphological characters
Polar.axis	Length of polar axis in µm
Equatorial.axis	Length of equatorial axis in µm (measured in equatorial view)
P/E	Polar axis/ equatorial axis
Equatorial.diameter	Diameter of equatorial axis in µm (measured in polar view)
Apocolpium.distance.max	Maximum distance between the apices of two colpi, measured in µm
Apocolpium.distance.min	Minimum distance between the apices of two colpi, measured in µm
PAI	Polar area index (also known as apocolpium index): apocolpium.distance.max/equatorial.diameter
Colpus.length	Length of colpi in µm
Colpus.width	Wight of colpi in µm
Porus.length	Length of pores in µm
Porus.width	Wight of pores in µm
Costa.thickness	Thickness of costae in µm
Sexine.equatorial.view	Thickness of sexine in µm (measured in equatorial view)
Nexine.equatorial.view	Thickness of nexine in µm (measured in equatorial view)
Exine.equatorial.view	Thickness of exine in µm (measured in equatorial view)
Exine.polar.area.equatorial.view	Thickness of exine in polar area in µm (measured in equatorial view)
Sexine.polar.view	Thickness of sexine in µm (measured in polar view)
Nexine.polar.view	Thickness of nexine in µm (measured in polar view)
Exine.polar.view	Thickness of exine in µm (measured in polar view)
Exine.index	Exine.polar.view/equatorial diameter
Scultpture	Striate or microreticulate
Punctae	0 = absent, 1 = present
Striae	Tight or loose striae pattern
Pattern	Striae pattern. 1 = convolute, 2 = intermediate, 3 = straight

## Sheet: FTIR_spectralData
	674.992	676.921	678.849	680.778	682.706	684.635	686.563	688.492	690.42	692.349	694.278	696.206	698.135	700.063	701.992	703.92	705.849	707.778	709.706	711.635	713.563	715.492	717.42	719.349	721.277	723.206	725.134	727.063	728.991	730.92	732.849	734.777	736.706	738.634	740.563	742.491	744.42	746.348	748.277	750.206	752.134	754.063	755.991	757.92	759.848	761.777	763.705	765.634	767.562
Nitraria_billardierei.1	0.281295	0.281372	0.280992	0.280649	0.280947	0.28215	0.284475	0.286755	0.28745	0.287158	0.287195	0.287796	0.288367	0.28885	0.289953	0.291151	0.291532	0.292235	0.294628	0.297504	0.298942	0.299221	0.299488	0.300176	0.301467	0.302547	0.302735	0.303006	0.304273	0.306346	0.30835	0.309731	0.310422	0.310488	0.310886	0.312422	0.31438	0.316017	0.317185	0.318019	0.319487	0.321718	0.323415	0.324367	0.325869	0.328627	0.33169	0.333955	0.33575
Nitraria_billardierei.2	0.258052	0.25851	0.258406	0.2581	0.257714	0.257549	0.258589	0.261073	0.262894	0.262689	0.262589	0.263805	0.265065	0.265938	0.266872	0.267929	0.269167	0.271094	0.27371	0.275711	0.276987	0.278896	0.281121	0.282717	0.284187	0.285978	0.287642	0.288591	0.289136	0.290367	0.292094	0.293183	0.293725	0.294824	0.296742	0.298406	0.2994	0.300372	0.301835	0.303556	0.30495	0.306263	0.307867	0.309233	0.310419	0.312246	0.314219	0.315529	0.316542
Nitraria_billardierei.3	0.310682	0.310671	0.310666	0.311285	0.312378	0.313191	0.313119	0.312941	0.313313	0.314118	0.315031	0.31533	0.315015	0.315262	0.316613	0.318295	0.319205	0.319574	0.321056	0.323888	0.326018	0.326191	0.32522	0.324956	0.326613	0.329062	0.330497	0.330888	0.331496	0.332467	0.332838	0.332853	0.333256	0.334305	0.335947	0.337388	0.338108	0.338806	0.33992	0.340943	0.342167	0.344242	0.346266	0.347511	0.3488	0.350351	0.352051	0.354457	0.356932
Nitraria_billardierei.4	0.190136	0.189954	0.190037	0.190406	0.190556	0.19021	0.18961	0.189113	0.188941	0.189115	0.18947	0.190101	0.190877	0.191183	0.191216	0.191647	0.192314	0.19288	0.193535	0.194499	0.195539	0.196217	0.196489	0.196584	0.196977	0.198171	0.199215	0.198975	0.198443	0.198985	0.200152	0.200744	0.200687	0.200676	0.201158	0.202087	0.202909	0.203235	0.203619	0.204756	0.20657	0.20863	0.210293	0.211249	0.212159	0.213523	0.215253	0.217043	0.21858
Nitraria_billardierei.5	0.279171	0.279218	0.280212	0.281994	0.282996	0.28321	0.283922	0.284742	0.285165	0.286004	0.287025	0.28776	0.288736	0.290063	0.2912	0.292143	0.293395	0.295156	0.297285	0.298893	0.29911	0.298971	0.299925	0.30153	0.303012	0.304505	0.305535	0.305891	0.306661	0.307893	0.308974	0.309901	0.310625	0.311508	0.312729	0.314066	0.315609	0.317127	0.31841	0.319788	0.321189	0.322435	0.324171	0.326776	0.329738	0.332289	0.334284	0.336179	0.337862
Nitraria_billardierei.6	0.229911	0.229986	0.230642	0.231786	0.232458	0.23252	0.232451	0.23245	0.232921	0.233881	0.234684	0.235318	0.236242	0.237387	0.238397	0.239308	0.240302	0.241388	0.242474	0.242962	0.242871	0.24357	0.245538	0.24756	0.248435	0.248408	0.248436	0.24856	0.248964	0.250267	0.251628	0.251789	0.251193	0.250948	0.251635	0.253012	0.254418	0.255918	0.257762	0.259445	0.260465	0.261292	0.262661	0.26443	0.266036	0.267429	0.268849	0.270096	0.270794
Nitraria_billardierei.7	0.205906	0.205966	0.206105	0.206701	0.207501	0.208569	0.209977	0.211425	0.212459	0.212779	0.212993	0.213652	0.214394	0.214611	0.214725	0.215608	0.21708	0.218877	0.220833	0.222515	0.223944	0.225116	0.225926	0.226749	0.22803	0.229338	0.229993	0.230685	0.231736	0.232464	0.233339	0.234604	0.235623	0.236538	0.237752	0.238901	0.239825	0.240986	0.242345	0.243697	0.245059	0.245981	0.246304	0.246622	0.247599	0.249211	0.250797	0.252138	0.25332
Nitraria_billardierei.8	0.228929	0.22813	0.228111	0.228859	0.229442	0.229059	0.228467	0.228704	0.229185	0.229173	0.229425	0.230539	0.231722	0.23257	0.233537	0.234363	0.234516	0.23467	0.235558	0.236506	0.237244	0.238343	0.23938	0.239937	0.240524	0.24126	0.241658	0.241855	0.24236	0.242605	0.242364	0.242555	0.242934	0.242926	0.24321	0.244015	0.244827	0.245783	0.24714	0.248542	0.249631	0.250604	0.252086	0.254148	0.256049	0.257284	0.25811	0.258886	0.259776
Nitraria_billardierei.9	0.221163	0.220251	0.220091	0.219975	0.219264	0.218029	0.217296	0.217646	0.218017	0.217401	0.216153	0.2155	0.216236	0.217337	0.217776	0.218411	0.219602	0.220429	0.220996	0.221693	0.222372	0.223302	0.224207	0.22478	0.225702	0.226842	0.227296	0.227191	0.2273	0.227754	0.228761	0.230681	0.232379	0.233224	0.23433	0.235847	0.237165	0.238123	0.238953	0.240328	0.242453	0.244629	0.246398	0.248498	0.251391	0.254192	0.256184	0.257161	0.257633
Nitraria_billardierei.10	0.275632	0.276257	0.276842	0.277009	0.276398	0.275616	0.275873	0.277336	0.279091	0.279944	0.279877	0.280071	0.281011	0.282634	0.284209	0.284485	0.283915	0.283846	0.284784	0.286613	0.288343	0.289418	0.290686	0.292347	0.29351	0.293849	0.294035	0.29454	0.295166	0.295596	0.296053	0.296948	0.297598	0.297637	0.298002	0.299283	0.301445	0.303833	0.305515	0.306753	0.308217	0.309606	0.310785	0.311814	0.312689	0.313997	0.315748	0.317532	0.319501
Nitraria_billardierei.11	0.2744	0.274688	0.274698	0.274807	0.274947	0.27502	0.275295	0.276072	0.277249	0.278014	0.277607	0.276886	0.277443	0.278912	0.28011	0.281063	0.281684	0.281701	0.281828	0.282701	0.284069	0.285398	0.286625	0.287926	0.288806	0.289451	0.290939	0.292643	0.293194	0.293036	0.293309	0.29384	0.2941	0.294632	0.295894	0.297684	0.29943	0.300582	0.301812	0.30381	0.305897	0.307209	0.307509	0.307507	0.308253	0.309799	0.311716	0.313638	0.315192
Nitraria_billardierei.12	0.251149	0.252308	0.253001	0.252753	0.252773	0.253591	0.254812	0.255778	0.256142	0.256231	0.256477	0.256795	0.256738	0.256742	0.257796	0.259506	0.260573	0.260863	0.261582	0.263253	0.265122	0.266769	0.268089	0.268745	0.268923	0.269457	0.270498	0.271469	0.272191	0.272649	0.273197	0.274104	0.274917	0.275392	0.27601	0.277357	0.279145	0.280682	0.281739	0.282554	0.283625	0.284841	0.285857	0.286965	0.288187	0.289469	0.291332	0.293331	0.294647
Nitraria_billardierei.13	0.282555	0.282112	0.280863	0.279846	0.280157	0.28094	0.281336	0.281369	0.280919	0.280314	0.280381	0.281329	0.282467	0.283079	0.283199	0.283582	0.284773	0.286673	0.28908	0.291509	0.293424	0.294951	0.296181	0.296726	0.296763	0.297315	0.299157	0.302074	0.304843	0.306154	0.306026	0.306036	0.307626	0.310256	0.312601	0.314258	0.315479	0.316552	0.317507	0.318773	0.32089	0.323261	0.325117	0.326648	0.328027	0.329168	0.330181	0.331123	0.332266
Nitraria_billardierei.14	0.234035	0.233681	0.23401	0.234023	0.233662	0.233558	0.234033	0.234119	0.233378	0.232702	0.23255	0.233051	0.234169	0.23563	0.236915	0.237178	0.236649	0.236869	0.238276	0.239376	0.239711	0.240758	0.242318	0.242838	0.243049	0.243919	0.244478	0.244536	0.245101	0.246214	0.24715	0.247905	0.248789	0.249382	0.249464	0.250011	0.251403	0.252659	0.253547	0.254552	0.255555	0.256665	0.258004	0.258822	0.25922	0.260247	0.261779	0.26279	0.263233
Nitraria_billardierei.15	0.288206	0.289911	0.291899	0.29228	0.291815	0.292131	0.293665	0.295262	0.295477	0.295103	0.295689	0.297079	0.298769	0.300357	0.300932	0.300646	0.301514	0.303959	0.305686	0.306304	0.307926	0.310306	0.311049	0.310331	0.310314	0.311481	0.312637	0.313615	0.315276	0.317111	0.31786	0.317763	0.317847	0.318713	0.320385	0.322054	0.323193	0.324167	0.325022	0.325454	0.326048	0.32741	0.328937	0.3301	0.331298	0.332953	0.334814	0.336068	0.336097
Nitraria_billardierei.16	0.236303	0.237231	0.236543	0.23469	0.233477	0.232863	0.232686	0.233289	0.234191	0.234795	0.23534	0.235741	0.235791	0.236062	0.236621	0.237138	0.237688	0.238493	0.239572	0.241033	0.242929	0.244446	0.245104	0.245498	0.246125	0.247	0.247754	0.248202	0.248602	0.248747	0.248723	0.249711	0.251854	0.25361	0.254475	0.255699	0.257756	0.259768	0.261625	0.263619	0.265068	0.265913	0.26734	0.26938	0.270706	0.271304	0.272497	0.274534	0.276849
Nitraria_billardierei.17	0.292245	0.291436	0.289905	0.288389	0.288047	0.288424	0.288405	0.288112	0.288133	0.288996	0.290755	0.292108	0.292244	0.292171	0.292393	0.292609	0.29332	0.294512	0.295433	0.296187	0.297404	0.29939	0.301689	0.303293	0.304119	0.304948	0.305698	0.305719	0.305517	0.306149	0.307116	0.30768	0.308679	0.310397	0.31216	0.313805	0.315354	0.316745	0.317438	0.317406	0.317992	0.319739	0.321885	0.323828	0.325023	0.325612	0.326443	0.327304	0.328092
Nitraria_billardierei.18	0.267551	0.267129	0.267177	0.267094	0.266958	0.266926	0.266737	0.266091	0.265713	0.266448	0.26804	0.269854	0.271144	0.271583	0.272292	0.274079	0.275487	0.27572	0.275977	0.276595	0.277343	0.278777	0.280735	0.28216	0.283237	0.28452	0.285945	0.287497	0.28838	0.288409	0.289174	0.29127	0.293558	0.295224	0.296249	0.297045	0.297931	0.298736	0.299535	0.300397	0.301199	0.302509	0.30465	0.306646	0.307675	0.308325	0.309188	0.310209	0.311645
Nitraria_billardierei.19	0.302378	0.30211	0.302763	0.303849	0.304692	0.304443	0.303315	0.302406	0.30181	0.301313	0.301499	0.301986	0.3015	0.300483	0.300516	0.30147	0.302405	0.303438	0.304518	0.305321	0.30607	0.307264	0.309189	0.31118	0.312396	0.312925	0.31318	0.313247	0.313271	0.313652	0.314669	0.316358	0.318132	0.319149	0.3194	0.319655	0.320526	0.321643	0.322403	0.323073	0.324202	0.325856	0.327759	0.329247	0.329937	0.330429	0.331477	0.333014	0.334529
Nitraria_billardierei.20	0.247409	0.246321	0.245924	0.245685	0.245826	0.246264	0.24669	0.247054	0.247275	0.247409	0.247825	0.248574	0.249165	0.249123	0.248882	0.24955	0.25074	0.251396	0.252084	0.253215	0.25394	0.254122	0.254224	0.254544	0.255166	0.255047	0.254157	0.253938	0.254162	0.253979	0.253966	0.255215	0.257383	0.25864	0.25848	0.258379	0.259336	0.2607	0.261318	0.261258	0.261428	0.262082	0.263041	0.26412	0.265146	0.266023	0.266898	0.267985	0.269249
Nitraria_retusa.1	0.249419	0.24984	0.25065	0.251316	0.252005	0.252568	0.252816	0.253054	0.253789	0.255074	0.256248	0.256801	0.257246	0.257941	0.258963	0.26034	0.261144	0.261726	0.263706	0.266265	0.267753	0.268527	0.269322	0.269622	0.269255	0.269323	0.270622	0.272902	0.274684	0.275313	0.276135	0.277381	0.278267	0.278542	0.278547	0.279155	0.280479	0.282048	0.283449	0.284249	0.284529	0.284898	0.28613	0.288252	0.290284	0.2915	0.29201	0.292674	0.294082
Nitraria_retusa.2	0.278573	0.277875	0.276713	0.276786	0.278736	0.280794	0.281601	0.280899	0.280474	0.28179	0.283723	0.284793	0.284208	0.283473	0.284801	0.287038	0.288134	0.288759	0.290354	0.292661	0.295001	0.296893	0.297948	0.29906	0.300221	0.300362	0.300069	0.300375	0.301608	0.303137	0.304003	0.304329	0.304612	0.305328	0.306865	0.308787	0.310343	0.311605	0.313144	0.31434	0.314997	0.316243	0.317669	0.318405	0.319474	0.321229	0.322519	0.323765	0.325818
Nitraria_retusa.3	0.287932	0.290627	0.291683	0.29043	0.288033	0.288044	0.291345	0.294245	0.295028	0.295499	0.296559	0.297497	0.298329	0.29962	0.301513	0.303494	0.305303	0.307404	0.309022	0.309686	0.310326	0.31127	0.312787	0.314711	0.316479	0.318324	0.320144	0.321227	0.321608	0.322407	0.324096	0.325286	0.325144	0.324875	0.325788	0.328182	0.331252	0.333517	0.334682	0.335416	0.335674	0.335683	0.336991	0.339977	0.342658	0.344187	0.345427	0.34642	0.347587
Nitraria_retusa.4	0.279361	0.281145	0.281993	0.281114	0.279506	0.279439	0.280821	0.281622	0.281404	0.280527	0.279218	0.278795	0.279727	0.280805	0.28131	0.281388	0.281697	0.282656	0.283556	0.283902	0.284515	0.286057	0.287446	0.287531	0.28708	0.286984	0.287347	0.287939	0.288182	0.288163	0.288651	0.289257	0.288735	0.287209	0.286658	0.287832	0.289206	0.290709	0.293004	0.294904	0.295717	0.295955	0.295914	0.295706	0.295866	0.297282	0.299346	0.300191	0.30007
Nitraria_retusa.5	0.314532	0.314664	0.315659	0.316569	0.316099	0.3158	0.316921	0.317925	0.318313	0.319236	0.320018	0.320196	0.32073	0.32192	0.323748	0.325896	0.327639	0.329079	0.330765	0.332649	0.334661	0.336786	0.338776	0.340381	0.340984	0.340692	0.341068	0.342443	0.343739	0.345054	0.347286	0.350753	0.354561	0.356994	0.357604	0.357749	0.358935	0.36098	0.362507	0.363573	0.365294	0.367482	0.369502	0.371703	0.374364	0.376583	0.377675	0.378944	0.381725
Nitraria_retusa.6	0.272351	0.273592	0.275218	0.277201	0.27868	0.279058	0.279551	0.280539	0.281147	0.281337	0.282297	0.284253	0.285657	0.286148	0.286732	0.287762	0.289349	0.291896	0.294791	0.296697	0.297656	0.29804	0.298156	0.299442	0.301942	0.304099	0.305854	0.307655	0.308831	0.309518	0.310723	0.312558	0.314494	0.315931	0.316577	0.31661	0.316901	0.31844	0.320925	0.323155	0.324684	0.326223	0.327871	0.328899	0.329485	0.330584	0.332705	0.335031	0.33693
Nitraria_retusa.7	0.394661	0.394977	0.395517	0.3958	0.395525	0.39575	0.397041	0.398882	0.401282	0.403454	0.403602	0.402399	0.402062	0.402697	0.403794	0.405873	0.408024	0.408825	0.409408	0.410919	0.412327	0.413714	0.416365	0.419333	0.420473	0.419789	0.419212	0.419958	0.421504	0.422565	0.423075	0.423334	0.422899	0.422902	0.42459	0.426975	0.42907	0.430579	0.430816	0.429906	0.429411	0.430211	0.43131	0.432013	0.432911	0.434288	0.435998	0.437478	0.438451
Nitraria_retusa.8	0.247188	0.247174	0.246787	0.24583	0.245651	0.246434	0.246941	0.246866	0.246968	0.248551	0.250786	0.251753	0.252345	0.253798	0.255375	0.25655	0.257877	0.260019	0.263067	0.266046	0.267295	0.267405	0.268564	0.270994	0.273106	0.273707	0.273672	0.274341	0.275687	0.277505	0.279533	0.280859	0.281542	0.28267	0.284458	0.286317	0.287817	0.289325	0.291486	0.293681	0.295051	0.296215	0.297977	0.300148	0.302231	0.303995	0.305685	0.307497	0.309105
Nitraria_retusa.9	0.195126	0.195991	0.19626	0.19536	0.194332	0.194376	0.194869	0.194702	0.194454	0.195257	0.196492	0.19748	0.198514	0.199525	0.200344	0.201138	0.201997	0.203042	0.204679	0.206278	0.206732	0.207267	0.209362	0.211831	0.213196	0.213851	0.21455	0.215363	0.216375	0.217325	0.218211	0.219397	0.220287	0.220801	0.222324	0.225067	0.227197	0.228222	0.229341	0.230491	0.231333	0.232732	0.234973	0.237472	0.240021	0.242132	0.243138	0.243378	0.24406
Nitraria_retusa.10	0.248706	0.250106	0.250879	0.251093	0.25176	0.25319	0.255004	0.25622	0.256165	0.255547	0.255425	0.2562	0.257852	0.259767	0.261599	0.263374	0.264437	0.264829	0.265493	0.266608	0.267867	0.269176	0.27034	0.27128	0.272116	0.272664	0.273263	0.27413	0.274371	0.274059	0.274422	0.275652	0.277407	0.279261	0.279688	0.278389	0.277766	0.278917	0.280121	0.280121	0.279795	0.280517	0.281932	0.283335	0.284913	0.286346	0.287354	0.287811	0.287972
Nitraria_retusa.11	0.276437	0.277424	0.277799	0.277818	0.278253	0.278684	0.278653	0.279013	0.280059	0.280897	0.281398	0.282318	0.283715	0.285375	0.286923	0.287934	0.288699	0.289074	0.28911	0.289941	0.291473	0.292274	0.2923	0.2927	0.293718	0.294983	0.296234	0.296889	0.296942	0.297407	0.298534	0.29889	0.298101	0.298102	0.299784	0.301763	0.302914	0.303535	0.303992	0.304262	0.304509	0.305395	0.307511	0.310099	0.311914	0.312794	0.313282	0.313883	0.315028
Nitraria_retusa.12	0.252895	0.254166	0.254798	0.254973	0.255897	0.257606	0.258358	0.257953	0.25837	0.260076	0.261584	0.262115	0.262552	0.263802	0.265402	0.266762	0.267765	0.268105	0.268551	0.270022	0.271909	0.273379	0.274081	0.274386	0.275123	0.276098	0.276558	0.27656	0.276696	0.277343	0.278117	0.278711	0.279732	0.281025	0.281458	0.281221	0.281319	0.281922	0.282844	0.284092	0.28567	0.287148	0.287993	0.288454	0.288958	0.289666	0.29082	0.292025	0.292762
Nitraria_retusa.13	0.291214	0.291547	0.291382	0.292082	0.2934	0.293609	0.292813	0.292733	0.293382	0.294148	0.295183	0.295909	0.296343	0.297023	0.297526	0.298303	0.300374	0.30283	0.304072	0.30438	0.304683	0.305199	0.306293	0.307681	0.308191	0.307795	0.307919	0.308972	0.309438	0.308961	0.308985	0.30984	0.310568	0.310788	0.311279	0.312325	0.313072	0.313551	0.314547	0.315703	0.316343	0.317018	0.318443	0.319792	0.320232	0.320543	0.321543	0.323051	0.324628
Nitraria_retusa.14	0.271906	0.272054	0.272554	0.273044	0.27329	0.273404	0.274124	0.275386	0.276172	0.276356	0.277164	0.279062	0.281086	0.282585	0.283857	0.285805	0.288437	0.290513	0.291616	0.292506	0.293867	0.295498	0.297177	0.298641	0.299059	0.298817	0.299292	0.300976	0.302831	0.303971	0.305197	0.306974	0.308633	0.30991	0.310866	0.311644	0.312504	0.31316	0.313784	0.315319	0.317691	0.320013	0.322023	0.323739	0.324965	0.325858	0.327046	0.328732	0.330354
Nitraria_retusa.15	0.237624	0.238036	0.238737	0.239598	0.240698	0.241576	0.242257	0.243152	0.24419	0.245089	0.246027	0.24742	0.249045	0.250102	0.250037	0.24981	0.251129	0.253949	0.256462	0.257687	0.258763	0.260098	0.26081	0.261188	0.262123	0.263644	0.2653	0.266573	0.267045	0.267426	0.268961	0.271645	0.27424	0.275618	0.276021	0.276311	0.276653	0.277653	0.279997	0.282826	0.285004	0.28646	0.2879	0.2895	0.291286	0.29343	0.294745	0.294929	0.295824
Nitraria_retusa.16	0.315795	0.315641	0.315147	0.315171	0.316315	0.318052	0.319884	0.321401	0.32224	0.32281	0.323927	0.325519	0.326943	0.327729	0.327953	0.3287	0.330089	0.331225	0.332831	0.33506	0.33633	0.336871	0.3383	0.340381	0.342079	0.343481	0.345023	0.347039	0.349303	0.351302	0.352694	0.352996	0.352442	0.352033	0.35235	0.353513	0.355426	0.357794	0.360246	0.361764	0.361839	0.362243	0.364038	0.365793	0.366885	0.367993	0.369383	0.371026	0.372276
Nitraria_retusa.17	0.244516	0.245321	0.247601	0.249756	0.250561	0.250327	0.250219	0.2512	0.25267	0.253208	0.252864	0.253096	0.254691	0.257006	0.259051	0.260506	0.261559	0.26278	0.264489	0.265756	0.265933	0.266593	0.269098	0.272012	0.273336	0.273201	0.272835	0.273205	0.27476	0.276929	0.278606	0.279596	0.280262	0.280806	0.28203	0.284047	0.285738	0.286644	0.287379	0.288013	0.288131	0.289117	0.292205	0.295526	0.297445	0.298951	0.300527	0.301479	0.302804
Nitraria_retusa.18	0.291618	0.292249	0.292393	0.292145	0.292977	0.295212	0.296708	0.296724	0.296835	0.297671	0.298821	0.299931	0.301027	0.302382	0.303979	0.305783	0.307158	0.307488	0.307914	0.309754	0.312624	0.315457	0.317625	0.31878	0.318965	0.318527	0.317968	0.318354	0.320147	0.322463	0.324266	0.324977	0.324975	0.325444	0.326848	0.328755	0.330668	0.331776	0.331525	0.331133	0.33239	0.334803	0.336687	0.337819	0.338593	0.339187	0.340131	0.341475	0.342653
Nitraria_retusa.19	0.225684	0.224654	0.223598	0.223413	0.22443	0.226118	0.227077	0.226596	0.226423	0.227665	0.2286	0.227849	0.22675	0.227194	0.22896	0.230558	0.23141	0.231877	0.232357	0.233514	0.235408	0.237047	0.237736	0.238035	0.23905	0.240535	0.241478	0.242293	0.243772	0.244934	0.24466	0.243728	0.243804	0.245246	0.246586	0.246949	0.247628	0.249338	0.250773	0.251554	0.252666	0.253942	0.254628	0.254893	0.255471	0.257081	0.259422	0.261344	0.262559
Nitraria_retusa.20	0.233922	0.234498	0.236381	0.237759	0.237887	0.238559	0.239583	0.239697	0.23972	0.240317	0.241287	0.242525	0.243846	0.245242	0.246449	0.247233	0.248161	0.24986	0.251996	0.253449	0.2547	0.256978	0.259117	0.26012	0.260805	0.261706	0.262821	0.263643	0.264014	0.264513	0.265206	0.266361	0.268227	0.270339	0.272226	0.273524	0.274846	0.276942	0.279172	0.280755	0.281788	0.28266	0.283532	0.284558	0.286217	0.2886	0.291195	0.293517	0.295592
Nitraria_schoberi.1	0.348638	0.347919	0.348892	0.350413	0.35146	0.352146	0.352497	0.352791	0.352705	0.352424	0.35352	0.355779	0.357338	0.357975	0.358703	0.360042	0.361203	0.36157	0.362151	0.363111	0.363979	0.365506	0.367777	0.369366	0.369615	0.369463	0.369733	0.369975	0.369942	0.370547	0.371998	0.373339	0.374076	0.374832	0.37587	0.376486	0.376746	0.377359	0.378564	0.38041	0.382577	0.384266	0.385546	0.387111	0.388521	0.389314	0.38996	0.390601	0.391408
Nitraria_schoberi.2	0.500556	0.498907	0.499964	0.501654	0.502081	0.502073	0.502459	0.50308	0.503761	0.504195	0.504957	0.506911	0.509065	0.50974	0.509667	0.510572	0.512231	0.514621	0.517987	0.520682	0.521725	0.522199	0.522932	0.52381	0.524259	0.524539	0.525768	0.527617	0.528712	0.528218	0.526806	0.5262	0.526639	0.527226	0.527599	0.527884	0.528392	0.528919	0.529257	0.52967	0.530486	0.531378	0.531542	0.530644	0.529189	0.52885	0.53007	0.531033	0.531151
Nitraria_schoberi.3	0.446926	0.448421	0.447975	0.446951	0.447344	0.448299	0.448832	0.449354	0.450304	0.451286	0.451818	0.452066	0.452336	0.452569	0.453164	0.454313	0.454865	0.454578	0.454803	0.455866	0.456846	0.457498	0.457836	0.457558	0.45729	0.45764	0.457937	0.458199	0.459391	0.460384	0.45909	0.456315	0.45453	0.454028	0.453804	0.453811	0.454188	0.455107	0.456466	0.457072	0.456583	0.45622	0.456068	0.45535	0.454731	0.455082	0.455706	0.455604	0.454775
Nitraria_schoberi.4	0.321228	0.320361	0.320787	0.322505	0.324031	0.324197	0.324016	0.324651	0.324845	0.324489	0.325848	0.32851	0.32939	0.327914	0.32688	0.327605	0.328769	0.330077	0.332335	0.335081	0.337069	0.338098	0.338472	0.338289	0.338296	0.338929	0.339801	0.340931	0.341905	0.342026	0.342188	0.343301	0.344228	0.344378	0.34507	0.346421	0.347865	0.349638	0.351189	0.352165	0.353422	0.35495	0.356075	0.356998	0.358202	0.359878	0.361775	0.363333	0.364347
Nitraria_schoberi.5	0.402123	0.403595	0.404569	0.403603	0.401076	0.399543	0.39992	0.400487	0.400659	0.401671	0.403613	0.404753	0.404761	0.405373	0.407063	0.408498	0.408833	0.408697	0.408467	0.407646	0.407241	0.408808	0.411079	0.412405	0.41335	0.414188	0.414336	0.414013	0.413864	0.413663	0.412441	0.410817	0.410963	0.412744	0.414223	0.414911	0.41549	0.416157	0.416801	0.417785	0.419161	0.420182	0.420676	0.421364	0.422299	0.42361	0.425614	0.42711	0.427256
Nitraria_schoberi.6	0.242657	0.24269	0.242741	0.242814	0.243579	0.244715	0.245356	0.245416	0.245609	0.246566	0.248204	0.249439	0.250057	0.250893	0.252114	0.253719	0.255054	0.255224	0.255116	0.256384	0.258905	0.261326	0.262846	0.26358	0.264204	0.264762	0.26532	0.266673	0.268836	0.270652	0.271468	0.2722	0.27354	0.27484	0.275953	0.277519	0.279582	0.281851	0.283984	0.285716	0.287558	0.289754	0.291824	0.293589	0.295104	0.296515	0.297808	0.298653	0.299129
Nitraria_schoberi.7	0.435169	0.434946	0.435326	0.435521	0.435001	0.434422	0.434001	0.433474	0.433762	0.43453	0.434433	0.43375	0.433119	0.43267	0.433051	0.434429	0.435369	0.435314	0.435316	0.436296	0.438098	0.439492	0.439458	0.438711	0.439148	0.440584	0.441277	0.440906	0.439838	0.438687	0.438127	0.437563	0.436262	0.435056	0.435215	0.436325	0.4369	0.436457	0.435848	0.436123	0.437278	0.438031	0.437424	0.435996	0.435205	0.435414	0.43575	0.436031	0.436408
Nitraria_schoberi.8	0.394266	0.39505	0.396974	0.398334	0.399106	0.399814	0.39988	0.399457	0.399291	0.399537	0.400137	0.401481	0.403539	0.405561	0.407339	0.4089	0.40972	0.410147	0.411693	0.414471	0.41692	0.418297	0.418984	0.420137	0.422339	0.423792	0.423501	0.42333	0.424192	0.425318	0.427096	0.429502	0.430744	0.431183	0.433096	0.435681	0.436858	0.437091	0.43806	0.440777	0.444157	0.446058	0.445986	0.445301	0.445536	0.446703	0.447874	0.449113	0.450676
Nitraria_schoberi.9	0.280858	0.279398	0.279104	0.278888	0.27853	0.278339	0.277929	0.277486	0.277549	0.277495	0.276346	0.274932	0.274445	0.274527	0.274932	0.275597	0.275956	0.27598	0.275714	0.27527	0.275732	0.277281	0.27839	0.278231	0.277528	0.277102	0.277165	0.277405	0.277251	0.276568	0.275849	0.275351	0.274732	0.27385	0.273148	0.27304	0.273319	0.273676	0.27404	0.274388	0.274842	0.275603	0.276659	0.277692	0.278209	0.278211	0.278537	0.279672	0.281041
Nitraria_schoberi.10	0.389913	0.389502	0.389742	0.391585	0.392565	0.391665	0.391432	0.392273	0.39253	0.391806	0.390037	0.387862	0.38749	0.389134	0.390877	0.39227	0.393414	0.393927	0.393848	0.393604	0.39396	0.395238	0.396543	0.39704	0.396953	0.396882	0.397423	0.398425	0.399466	0.400638	0.401696	0.402182	0.401828	0.400718	0.399702	0.399572	0.399993	0.400372	0.401052	0.402165	0.403169	0.403934	0.404139	0.403615	0.403274	0.403832	0.404954	0.405689	0.405994
Nitraria_schoberi.11	0.374482	0.374788	0.375119	0.375934	0.376762	0.37767	0.378873	0.379511	0.379662	0.379433	0.378382	0.37751	0.377793	0.378607	0.37973	0.381459	0.383251	0.384506	0.385537	0.386728	0.387655	0.388816	0.390871	0.392252	0.392249	0.392223	0.392678	0.393486	0.394833	0.396369	0.397399	0.397808	0.397787	0.397311	0.396822	0.397359	0.398743	0.400375	0.402562	0.404477	0.405193	0.405828	0.407266	0.408782	0.409714	0.41078	0.412594	0.414439	0.416026
Nitraria_schoberi.12	0.429664	0.429474	0.430271	0.431858	0.433371	0.434316	0.434496	0.434639	0.435335	0.4366	0.437955	0.438763	0.43932	0.441072	0.444075	0.44649	0.447665	0.44804	0.448484	0.450129	0.453075	0.45701	0.460866	0.462848	0.463018	0.462973	0.463321	0.463965	0.46509	0.46658	0.468254	0.470179	0.472354	0.474424	0.475814	0.476639	0.477732	0.479213	0.480318	0.481187	0.482422	0.483647	0.485015	0.487149	0.489261	0.49045	0.490911	0.491246	0.492149
Nitraria_schoberi.13	0.460766	0.464168	0.466519	0.466892	0.466614	0.466817	0.468089	0.470977	0.474495	0.47673	0.477608	0.477665	0.476936	0.476792	0.478164	0.479946	0.481626	0.483459	0.485203	0.486762	0.487587	0.488231	0.490382	0.492635	0.49363	0.494841	0.496573	0.498342	0.500305	0.501913	0.502289	0.502099	0.502491	0.503534	0.505379	0.507311	0.508085	0.508901	0.510997	0.512618	0.512368	0.511883	0.512407	0.512829	0.512972	0.513788	0.515062	0.515978	0.515602
Nitraria_schoberi.14	0.296741	0.297727	0.298031	0.298665	0.300112	0.301413	0.302076	0.302061	0.301521	0.301977	0.303572	0.303863	0.302721	0.302421	0.303476	0.304509	0.304822	0.305216	0.30634	0.308131	0.310481	0.312394	0.31295	0.312904	0.312941	0.313086	0.314147	0.316049	0.317153	0.317225	0.317035	0.31655	0.316264	0.317385	0.319685	0.321197	0.321489	0.322271	0.323767	0.324973	0.326261	0.328117	0.329622	0.33048	0.331486	0.332605	0.333454	0.334156	0.334814
Nitraria_schoberi.15	0.4776	0.480384	0.484258	0.486237	0.485124	0.483709	0.485011	0.488516	0.491528	0.493085	0.4945	0.496039	0.49658	0.496122	0.495905	0.496731	0.498358	0.500418	0.502988	0.505901	0.508921	0.511799	0.513996	0.515365	0.515565	0.514829	0.51497	0.517138	0.520082	0.521533	0.521414	0.521914	0.523695	0.525751	0.527775	0.529546	0.530868	0.531955	0.532873	0.533526	0.533469	0.532279	0.530833	0.530707	0.531979	0.534069	0.536889	0.539275	0.540347
Nitraria_schoberi.16	0.431849	0.431822	0.432287	0.432834	0.433182	0.433552	0.434686	0.436712	0.437917	0.437791	0.438278	0.440069	0.442098	0.443684	0.445155	0.44712	0.449078	0.450191	0.450324	0.450182	0.451042	0.45279	0.454698	0.457242	0.460033	0.461388	0.461228	0.461262	0.461668	0.461522	0.461853	0.463385	0.464957	0.465594	0.46518	0.464701	0.465262	0.466203	0.466648	0.467034	0.467784	0.468614	0.468568	0.467468	0.466718	0.467076	0.468071	0.4695	0.471185
Nitraria_schoberi.17	0.30953	0.310754	0.31168	0.311834	0.311932	0.313077	0.314219	0.314235	0.314636	0.316227	0.317589	0.317505	0.316339	0.315858	0.316723	0.317905	0.319262	0.320847	0.321881	0.321967	0.321705	0.322346	0.32407	0.325715	0.326435	0.32623	0.325712	0.326047	0.327562	0.328534	0.328157	0.32757	0.327105	0.326806	0.327296	0.328174	0.328742	0.329148	0.329556	0.329811	0.329932	0.330638	0.331933	0.332835	0.333352	0.333924	0.334608	0.335423	0.336041
Nitraria_schoberi.18	0.352743	0.3526	0.351503	0.350616	0.351024	0.351605	0.351857	0.352185	0.35254	0.352681	0.352907	0.353533	0.354112	0.354576	0.354964	0.354828	0.354202	0.35326	0.352492	0.352686	0.353526	0.354239	0.355206	0.356473	0.356806	0.356357	0.356163	0.355982	0.355896	0.356293	0.356089	0.354926	0.354491	0.355065	0.355309	0.355065	0.355139	0.355735	0.356281	0.356584	0.357021	0.358081	0.359778	0.361244	0.361917	0.362186	0.362382	0.362465	0.362892
Nitraria_schoberi.19	0.409093	0.407421	0.406087	0.405375	0.405217	0.406039	0.406201	0.404817	0.403778	0.403821	0.40338	0.401852	0.401055	0.401868	0.403167	0.404216	0.404764	0.404853	0.404923	0.404981	0.404837	0.404873	0.405492	0.406282	0.40652	0.406429	0.406838	0.407942	0.409264	0.410191	0.410965	0.411683	0.411404	0.410811	0.411681	0.413832	0.415579	0.416092	0.416531	0.417755	0.41911	0.420054	0.420649	0.421511	0.422825	0.423891	0.424414	0.424893	0.425842
Nitraria_schoberi.20	0.318986	0.319515	0.319684	0.320891	0.322943	0.325315	0.327497	0.328455	0.32805	0.327775	0.32835	0.32892	0.329119	0.330084	0.332605	0.334986	0.335876	0.336566	0.338211	0.340823	0.343487	0.344752	0.344769	0.345108	0.346404	0.347621	0.347866	0.348042	0.349483	0.351676	0.353159	0.353867	0.354254	0.354553	0.355537	0.357329	0.358825	0.359584	0.360334	0.361432	0.362679	0.363482	0.363777	0.364725	0.366549	0.368219	0.369491	0.370942	0.372693
Nitraria_sibirica.1	0.0996846	0.0999991	0.10039	0.100536	0.100858	0.101624	0.102698	0.103926	0.105457	0.106913	0.107686	0.107968	0.108207	0.108419	0.108586	0.109365	0.111022	0.112432	0.113038	0.113945	0.115833	0.117474	0.117806	0.117769	0.118427	0.119339	0.120104	0.121049	0.122092	0.123226	0.124664	0.125936	0.126569	0.126913	0.127371	0.127918	0.128723	0.130176	0.131961	0.133438	0.135285	0.138063	0.140749	0.142958	0.145556	0.148342	0.150133	0.150649	0.150228
Nitraria_sibirica.2	0.185314	0.185334	0.183967	0.182654	0.183489	0.185757	0.187625	0.188675	0.189542	0.190904	0.192859	0.19462	0.195736	0.19668	0.197497	0.197779	0.19761	0.197932	0.199544	0.202069	0.204276	0.205584	0.206963	0.208706	0.210128	0.211096	0.211734	0.212707	0.21419	0.215019	0.215009	0.21547	0.216814	0.218553	0.220692	0.222785	0.224214	0.225093	0.225627	0.226271	0.227632	0.229616	0.231759	0.233828	0.23543	0.236528	0.237627	0.238869	0.240109
Nitraria_sibirica.3	0.180851	0.179821	0.179923	0.181141	0.182349	0.182661	0.182829	0.184013	0.185765	0.187374	0.189013	0.190964	0.192883	0.194257	0.195212	0.196005	0.196595	0.197102	0.19783	0.199295	0.201731	0.20443	0.206595	0.208007	0.208921	0.209792	0.210701	0.211524	0.212545	0.213782	0.214634	0.215257	0.216546	0.218559	0.220432	0.221807	0.222999	0.223904	0.224686	0.226273	0.228519	0.23019	0.231384	0.233146	0.235375	0.237457	0.239675	0.242442	0.245008
Nitraria_sibirica.4	0.206561	0.206599	0.206559	0.206325	0.206215	0.206805	0.207816	0.208381	0.208322	0.208348	0.209062	0.210048	0.210907	0.212111	0.213636	0.214371	0.213848	0.21353	0.215045	0.218245	0.2219	0.224606	0.225757	0.225871	0.225794	0.225867	0.22592	0.226425	0.227753	0.229092	0.229832	0.230726	0.23268	0.235039	0.236374	0.236519	0.236735	0.237898	0.239591	0.241095	0.242333	0.243673	0.245126	0.246444	0.248202	0.250613	0.25228	0.252688	0.253085
Nitraria_sibirica.5	0.151067	0.150513	0.149032	0.147074	0.145792	0.146124	0.147093	0.147243	0.147347	0.148135	0.148961	0.150011	0.151689	0.152903	0.153056	0.15323	0.154314	0.156246	0.158011	0.158691	0.159104	0.160205	0.161561	0.162603	0.163339	0.164174	0.165727	0.167786	0.169084	0.169273	0.169833	0.171698	0.173741	0.174934	0.175464	0.175843	0.176696	0.178072	0.17939	0.180403	0.181484	0.182863	0.184209	0.185329	0.186549	0.188194	0.190075	0.191846	0.193333
Nitraria_sibirica.6	0.3163	0.317092	0.317474	0.317553	0.317951	0.318066	0.317139	0.316502	0.317387	0.319152	0.320761	0.321849	0.322625	0.323404	0.324368	0.325238	0.32583	0.32682	0.32826	0.329596	0.330853	0.331933	0.33321	0.335124	0.33701	0.338502	0.339641	0.340154	0.340508	0.341456	0.342722	0.34399	0.345207	0.345728	0.345196	0.344869	0.346009	0.34771	0.348823	0.349365	0.349749	0.350405	0.351622	0.353267	0.354493	0.355501	0.357324	0.35922	0.360223
Nitraria_sibirica.7	0.202738	0.202772	0.2032	0.20463	0.206133	0.206885	0.206898	0.207122	0.208765	0.21131	0.2135	0.214917	0.215823	0.216712	0.217213	0.217217	0.217915	0.219648	0.221401	0.222789	0.224104	0.225443	0.226733	0.227793	0.228686	0.22969	0.230902	0.232263	0.233753	0.235235	0.236375	0.237214	0.238042	0.238937	0.240465	0.242613	0.24381	0.243613	0.243769	0.24526	0.247335	0.249425	0.251467	0.253632	0.256028	0.257874	0.258844	0.25976	0.260857
Nitraria_sibirica.8	0.187994	0.187724	0.187054	0.186587	0.186275	0.185862	0.186327	0.1879	0.188922	0.189378	0.190567	0.192189	0.193837	0.195376	0.196212	0.19685	0.197814	0.19844	0.199233	0.201365	0.204236	0.206409	0.207768	0.209061	0.210329	0.211365	0.211977	0.211884	0.211801	0.212858	0.214723	0.216388	0.217687	0.218596	0.219054	0.219727	0.221332	0.223372	0.225344	0.227539	0.229663	0.23151	0.233578	0.236165	0.239056	0.241534	0.243377	0.245076	0.246709
Nitraria_sibirica.9	0.212555	0.212783	0.212322	0.212687	0.213606	0.213748	0.212924	0.212561	0.213518	0.215084	0.216728	0.218448	0.21977	0.220257	0.220317	0.220562	0.221123	0.222049	0.223389	0.225073	0.227275	0.229319	0.230493	0.231723	0.232873	0.232881	0.232834	0.234034	0.23559	0.236425	0.23684	0.237387	0.2382	0.238931	0.239395	0.24027	0.241709	0.242741	0.243102	0.24352	0.244336	0.245344	0.246348	0.24721	0.248224	0.249738	0.251471	0.252876	0.253696
Nitraria_sphaerocarpa.1	0.210197	0.210603	0.210567	0.209983	0.209784	0.210286	0.210866	0.210847	0.210409	0.210545	0.211437	0.21259	0.213833	0.215096	0.216159	0.216611	0.216541	0.217323	0.219645	0.221713	0.222519	0.223581	0.225571	0.227554	0.229017	0.22978	0.229545	0.228559	0.227917	0.228774	0.230702	0.232212	0.233033	0.233579	0.234031	0.234672	0.235293	0.235807	0.236538	0.237258	0.238053	0.23941	0.241155	0.242839	0.244268	0.245386	0.246308	0.247147	0.247971
Nitraria_sphaerocarpa.2	0.17839	0.179041	0.180174	0.182275	0.183925	0.183831	0.183492	0.183908	0.184266	0.184532	0.185198	0.185918	0.186315	0.186978	0.188123	0.189196	0.190122	0.191081	0.192039	0.19291	0.194016	0.195608	0.197342	0.199013	0.200628	0.20203	0.203223	0.204397	0.205386	0.206055	0.206646	0.207456	0.208768	0.210469	0.212488	0.215097	0.217774	0.219488	0.220649	0.222138	0.223328	0.223938	0.224859	0.226084	0.226929	0.22753	0.228422	0.229569	0.230794
Nitraria_sphaerocarpa.3	0.292432	0.292232	0.292615	0.293941	0.29467	0.294671	0.294785	0.295741	0.297683	0.299427	0.299945	0.299831	0.299872	0.300306	0.301492	0.302978	0.303881	0.304569	0.305919	0.307707	0.308934	0.30955	0.310688	0.312771	0.314824	0.316097	0.316513	0.316359	0.316097	0.316149	0.316997	0.318532	0.320333	0.321762	0.322518	0.323458	0.324753	0.325963	0.327412	0.329076	0.330185	0.330628	0.331395	0.332738	0.334033	0.335405	0.336973	0.338493	0.340143
Nitraria_tangutorum.1	0.291615	0.2903	0.289549	0.290444	0.290717	0.29208	0.294314	0.294524	0.295218	0.297626	0.299398	0.299934	0.30079	0.303495	0.304246	0.302907	0.303094	0.303559	0.303026	0.30411	0.307497	0.309184	0.308571	0.309445	0.311004	0.312034	0.313541	0.31389	0.314708	0.316496	0.317159	0.316541	0.316631	0.317819	0.319802	0.32033	0.3203	0.321273	0.321956	0.322641	0.324797	0.326197	0.326728	0.327155	0.328548	0.329506	0.330616	0.333809	0.336585
Nitraria_tangutorum.2	0.251765	0.252141	0.253171	0.253722	0.255718	0.257198	0.256583	0.257371	0.258643	0.259672	0.261617	0.262585	0.263184	0.264952	0.265587	0.264903	0.264802	0.266051	0.266966	0.268109	0.271	0.274218	0.274157	0.272948	0.27336	0.274814	0.27521	0.275309	0.276036	0.276414	0.277024	0.277997	0.278499	0.279264	0.280015	0.281309	0.281753	0.281107	0.280998	0.281857	0.283458	0.284726	0.284813	0.284923	0.285166	0.285018	0.286696	0.288892	0.288887
Nitraria_tangutorum.3	0.234815	0.234942	0.236894	0.238349	0.23853	0.238953	0.241203	0.241132	0.239821	0.241299	0.242322	0.24282	0.244906	0.247076	0.248314	0.248862	0.248876	0.251066	0.253547	0.252935	0.253023	0.25615	0.258801	0.259828	0.26053	0.261961	0.262495	0.262573	0.262661	0.263961	0.264924	0.265337	0.266924	0.269786	0.272129	0.273205	0.274174	0.275676	0.276435	0.276549	0.277514	0.27926	0.28037	0.281162	0.281984	0.28351	0.283969	0.284202	0.285565
Nitraria_tangutorum.4	0.177171	0.176567	0.176762	0.177559	0.17874	0.17934	0.179788	0.181048	0.181714	0.181572	0.181448	0.182011	0.183092	0.185101	0.18582	0.186252	0.185867	0.186395	0.187432	0.188578	0.192088	0.195341	0.195423	0.196389	0.197336	0.197974	0.19916	0.200702	0.201255	0.201907	0.201842	0.201798	0.20353	0.20517	0.205865	0.208285	0.209834	0.209598	0.20888	0.209563	0.211366	0.213619	0.215605	0.216627	0.217826	0.219173	0.219996	0.220967	0.220965
Nitraria_tangutorum.5	0.214928	0.215248	0.214684	0.215618	0.216977	0.218721	0.220268	0.21875	0.217095	0.219071	0.221733	0.223225	0.222672	0.223367	0.224095	0.226206	0.228862	0.230798	0.231737	0.233143	0.235642	0.237921	0.237349	0.237104	0.238289	0.23916	0.240229	0.241047	0.242495	0.244482	0.246164	0.248601	0.249883	0.250923	0.252348	0.252688	0.253317	0.2553	0.256748	0.259103	0.261319	0.2617	0.26271	0.26522	0.266103	0.266794	0.269503	0.271796	0.272213
Nitraria_tangutorum.6	0.254889	0.254988	0.252398	0.251058	0.25207	0.253704	0.254676	0.254426	0.25436	0.255736	0.257524	0.258109	0.258041	0.26039	0.263264	0.262875	0.262418	0.262952	0.263017	0.264214	0.266576	0.268346	0.270541	0.273603	0.275481	0.276268	0.276203	0.277126	0.278317	0.278717	0.279912	0.28165	0.282507	0.28227	0.281666	0.282592	0.285334	0.286614	0.287979	0.290128	0.291148	0.291574	0.293247	0.294925	0.296553	0.298792	0.301802	0.303046	0.303216
Nitraria_tangutorum.7	0.230274	0.2315	0.230981	0.23155	0.233994	0.234499	0.234159	0.235996	0.235743	0.23574	0.237271	0.238434	0.239798	0.240253	0.240475	0.241675	0.241664	0.242245	0.242763	0.243954	0.246786	0.248248	0.248811	0.250724	0.2527	0.252892	0.252619	0.252212	0.254139	0.2574	0.258365	0.258658	0.259063	0.259989	0.261479	0.262757	0.262321	0.26255	0.26415	0.265083	0.26627	0.268686	0.271319	0.27172	0.271302	0.272411	0.275158	0.276759	0.27711
Nitraria_tangutorum.8	0.259199	0.258803	0.25858	0.263213	0.266929	0.266334	0.264815	0.26503	0.265942	0.266168	0.26675	0.269168	0.27018	0.271148	0.272955	0.275469	0.275546	0.276214	0.278192	0.279183	0.279514	0.280604	0.283441	0.285669	0.286671	0.28695	0.288121	0.288572	0.288996	0.290459	0.292153	0.293514	0.295553	0.296356	0.29735	0.298764	0.299838	0.301451	0.302192	0.302193	0.303772	0.305561	0.306996	0.30924	0.311075	0.31281	0.31426	0.315781	0.317392
Nitraria_tangutorum.9	0.266306	0.265721	0.265602	0.266547	0.266741	0.267692	0.269886	0.27127	0.272527	0.27313	0.273938	0.275412	0.274476	0.275832	0.277826	0.278753	0.280876	0.283852	0.286551	0.287969	0.28911	0.290834	0.292197	0.294317	0.295054	0.294723	0.296393	0.298662	0.300162	0.300877	0.301599	0.304489	0.309324	0.310722	0.310811	0.312284	0.31479	0.31698	0.319019	0.32226	0.32523	0.326357	0.327723	0.329588	0.332518	0.335939	0.337406	0.338083	0.340459
Nitraria_tangutorum.10	0.260396	0.259314	0.260416	0.263489	0.265403	0.265766	0.265395	0.265243	0.266958	0.270035	0.271211	0.27168	0.272109	0.271806	0.272021	0.273573	0.275028	0.277072	0.278219	0.277745	0.278439	0.2808	0.28256	0.28304	0.283917	0.287049	0.287596	0.287058	0.288635	0.290888	0.289977	0.289324	0.291581	0.292339	0.291971	0.292921	0.294081	0.295601	0.296972	0.29816	0.299364	0.300801	0.301225	0.302458	0.303875	0.304444	0.306509	0.30762	0.307737
Nitraria_tangutorum.11	0.200445	0.20193	0.202674	0.202637	0.202883	0.203696	0.204257	0.204475	0.203719	0.203995	0.205546	0.207157	0.207456	0.209568	0.210127	0.210547	0.212735	0.212795	0.211471	0.212252	0.213062	0.212348	0.212914	0.215718	0.217247	0.218065	0.217985	0.21809	0.218359	0.219189	0.219561	0.219709	0.221574	0.222491	0.222884	0.223881	0.224389	0.224219	0.224744	0.225659	0.227321	0.228004	0.228938	0.230735	0.231618	0.232653	0.234076	0.234714	0.234822
Nitraria_tangutorum.12	0.2598	0.2596	0.262226	0.265336	0.264594	0.264733	0.266289	0.267641	0.268332	0.27042	0.271153	0.270746	0.271598	0.27263	0.27381	0.276316	0.278251	0.27947	0.280164	0.280917	0.282667	0.284914	0.285596	0.287343	0.289758	0.288821	0.287932	0.289035	0.290388	0.291764	0.292307	0.293845	0.295672	0.295864	0.294441	0.294632	0.296918	0.298734	0.299933	0.301426	0.302039	0.303082	0.304694	0.306067	0.30632	0.307875	0.309953	0.311527	0.31233
Nitraria_tangutorum.13	0.161091	0.161288	0.161278	0.161492	0.160753	0.160387	0.159629	0.159434	0.160199	0.161989	0.162499	0.160716	0.15917	0.158498	0.158744	0.15758	0.156282	0.1562	0.157918	0.159198	0.158888	0.158244	0.158222	0.157977	0.15735	0.158394	0.159395	0.159257	0.159854	0.159392	0.158553	0.158263	0.158109	0.159059	0.160158	0.160006	0.1596	0.159441	0.160154	0.161354	0.161367	0.161243	0.162153	0.163133	0.164354	0.165571	0.166642	0.168437	0.169686
Nitraria_tangutorum.14	0.286204	0.287073	0.287208	0.287047	0.287573	0.288144	0.288456	0.289061	0.289409	0.289803	0.292143	0.29309	0.292116	0.291382	0.290032	0.288455	0.28803	0.288785	0.290405	0.291426	0.292208	0.294247	0.293799	0.292933	0.293645	0.295264	0.294723	0.294227	0.295108	0.296377	0.296994	0.295599	0.29368	0.29289	0.293934	0.296584	0.298753	0.297641	0.296779	0.297856	0.29733	0.297346	0.299376	0.30054	0.29954	0.299346	0.301295	0.3043	0.305891
Nitraria_tangutorum.15	0.228366	0.231721	0.233773	0.23386	0.233484	0.234166	0.235287	0.236666	0.238055	0.240178	0.240589	0.241566	0.242088	0.242897	0.244585	0.24593	0.248081	0.250013	0.250953	0.252638	0.253848	0.256144	0.258718	0.260741	0.26321	0.264264	0.264393	0.265587	0.26729	0.267528	0.26628	0.26697	0.270501	0.274043	0.276426	0.276796	0.276938	0.277423	0.279043	0.281772	0.284697	0.2867	0.287449	0.287235	0.288459	0.290258	0.290909	0.291746	0.29393
Nitraria_tangutorum.16	0.262146	0.26239	0.263731	0.263577	0.263972	0.264435	0.264703	0.265299	0.264331	0.262114	0.262162	0.26463	0.26688	0.267684	0.268709	0.269992	0.269805	0.27081	0.272068	0.273703	0.274332	0.274353	0.274143	0.27556	0.277837	0.279395	0.279206	0.278506	0.278485	0.278968	0.279432	0.279926	0.280376	0.281885	0.282649	0.282703	0.283739	0.285658	0.285456	0.285302	0.287695	0.288694	0.288894	0.290498	0.291866	0.291752	0.292967	0.29439	0.295188
Nitraria_tangutorum.17	0.255539	0.254769	0.255055	0.255757	0.255812	0.256751	0.256704	0.256697	0.257005	0.257825	0.259886	0.258578	0.258106	0.259778	0.261207	0.26369	0.266079	0.266963	0.268064	0.269559	0.271351	0.273126	0.274617	0.275329	0.276359	0.277072	0.277622	0.278934	0.280199	0.280779	0.281267	0.281769	0.283461	0.285581	0.286641	0.28832	0.290852	0.292773	0.293561	0.294387	0.294616	0.295275	0.297049	0.298641	0.300563	0.302248	0.303342	0.305728	0.306423
Nitraria_tangutorum.18	0.270959	0.272801	0.273388	0.273151	0.274433	0.277351	0.279359	0.278673	0.275972	0.276138	0.277245	0.279186	0.280275	0.279821	0.279466	0.280541	0.282814	0.286053	0.288333	0.287937	0.287514	0.28902	0.291463	0.293045	0.293204	0.293315	0.294202	0.294732	0.295937	0.297995	0.297572	0.297364	0.298248	0.299241	0.301832	0.302663	0.303285	0.305272	0.305704	0.306218	0.307702	0.310088	0.312979	0.314784	0.315155	0.315421	0.316345	0.317618	0.320256
Nitraria_tangutorum.19	0.227275	0.226159	0.224222	0.225838	0.228788	0.231397	0.23196	0.232361	0.232916	0.233369	0.234399	0.235629	0.236829	0.237174	0.237165	0.239694	0.242307	0.243331	0.243312	0.244156	0.244719	0.245613	0.246188	0.247625	0.249654	0.250211	0.249773	0.251144	0.252469	0.253261	0.253178	0.254181	0.25512	0.256913	0.259701	0.260911	0.260656	0.26046	0.260715	0.262398	0.264189	0.264822	0.265879	0.267253	0.268817	0.268825	0.268255	0.268614	0.269386
Nitraria_tangutorum.20	0.195407	0.197142	0.197958	0.19809	0.198444	0.199772	0.199273	0.199859	0.201186	0.201818	0.201546	0.203291	0.205818	0.207249	0.208262	0.209887	0.210878	0.212349	0.214461	0.214709	0.214138	0.215997	0.218478	0.2201	0.222043	0.223287	0.224278	0.225542	0.226363	0.22773	0.228227	0.227409	0.227084	0.22752	0.228585	0.230038	0.231779	0.23291	0.233634	0.234467	0.235226	0.236063	0.237379	0.2384	0.238883	0.240153	0.243524	0.245487	0.245355
Peganum_nigellastrum.1	0.0780278	0.0764143	0.0773943	0.077724	0.0766302	0.0767057	0.0786991	0.080036	0.0795848	0.0792871	0.0790865	0.0785981	0.0796171	0.0813308	0.0812575	0.0808728	0.0818482	0.0832019	0.0825604	0.0821485	0.0824765	0.0841573	0.0854788	0.0848007	0.0842466	0.0851574	0.0863691	0.087525	0.0879252	0.0883079	0.0880524	0.0876221	0.0882858	0.0896399	0.0895605	0.0897352	0.0890558	0.0891326	0.0909309	0.0921323	0.0937755	0.0947401	0.0940521	0.0943428	0.0963976	0.0979243	0.0978962	0.0975666	0.098011
Peganum_nigellastrum.2	0.111949	0.111105	0.110259	0.110867	0.111411	0.110976	0.111238	0.111632	0.110774	0.109577	0.111489	0.114897	0.114826	0.11501	0.116372	0.116908	0.115997	0.116282	0.117213	0.117986	0.11832	0.118324	0.119877	0.121735	0.122252	0.122025	0.12117	0.121308	0.122752	0.123489	0.124173	0.126251	0.127175	0.125999	0.125985	0.127387	0.129026	0.131008	0.131552	0.131537	0.132379	0.133764	0.135077	0.135876	0.13656	0.137898	0.138053	0.13775	0.138683
Peganum_nigellastrum.3	0.0930819	0.0922362	0.0912718	0.0919118	0.0920147	0.0921574	0.0924433	0.0924139	0.0925518	0.0940202	0.094827	0.0947594	0.0952325	0.0959461	0.0968307	0.0967159	0.096253	0.0975377	0.0989648	0.0993571	0.100516	0.100922	0.100829	0.101586	0.102916	0.103131	0.103418	0.104159	0.10383	0.103705	0.104409	0.105029	0.105589	0.107194	0.108475	0.108836	0.108134	0.107776	0.109406	0.110932	0.111469	0.111896	0.113002	0.114404	0.115341	0.115312	0.115284	0.11674	0.117726
Peganum_nigellastrum.4	0.120715	0.119286	0.118067	0.117954	0.117264	0.116983	0.11733	0.117755	0.117628	0.117237	0.116058	0.115921	0.116391	0.115665	0.116196	0.116259	0.115093	0.114609	0.11393	0.113811	0.114907	0.115691	0.11637	0.117507	0.118805	0.119394	0.118572	0.117207	0.118237	0.120551	0.120982	0.121355	0.122282	0.123087	0.124191	0.125375	0.125952	0.126322	0.127553	0.129163	0.129487	0.130054	0.131593	0.134606	0.136932	0.137045	0.137463	0.138809	0.139812
Peganum_nigellastrum.5	0.149685	0.149281	0.147933	0.147009	0.146456	0.14567	0.144057	0.143156	0.142996	0.142659	0.141841	0.141991	0.142136	0.141402	0.140469	0.138903	0.13789	0.137985	0.13771	0.137859	0.139672	0.140791	0.139598	0.138323	0.138832	0.139388	0.1381	0.138275	0.139148	0.138336	0.13694	0.137384	0.138848	0.140064	0.14085	0.140529	0.139602	0.139075	0.13954	0.140723	0.141942	0.142085	0.14203	0.142068	0.141728	0.142092	0.143215	0.143931	0.144015
Peganum_nigellastrum.6	0.13778	0.13552	0.135484	0.137513	0.138818	0.137212	0.13666	0.136887	0.134648	0.131618	0.130982	0.12949	0.126555	0.124695	0.125447	0.129368	0.132218	0.132994	0.134965	0.137221	0.138753	0.139646	0.1394	0.141054	0.142569	0.143572	0.144476	0.143587	0.143969	0.146276	0.14665	0.146638	0.146463	0.145845	0.145897	0.146296	0.145762	0.144885	0.143371	0.142221	0.142186	0.142037	0.141116	0.139798	0.138705	0.137732	0.135868	0.13456	0.133023
Peganum_nigellastrum.7	0.085429	0.0841264	0.0849258	0.0860453	0.0846096	0.084181	0.0841646	0.0841418	0.0861934	0.0878556	0.0871444	0.0851557	0.0835799	0.0841754	0.0871095	0.0883756	0.0865367	0.084539	0.0839624	0.0854191	0.0862041	0.0865186	0.0875491	0.087393	0.0862303	0.085819	0.0864523	0.0882867	0.0892922	0.08873	0.0887045	0.0884031	0.0873738	0.0872724	0.088402	0.0893296	0.0892937	0.0899696	0.0901882	0.0902495	0.0911644	0.092697	0.093831	0.093586	0.0925525	0.0932074	0.0942462	0.0949855	0.0970833
Peganum_nigellastrum.8	0.0820164	0.0817042	0.0799963	0.0793368	0.0794788	0.07985	0.0801827	0.0805635	0.0810948	0.0833302	0.0842965	0.0843702	0.0839843	0.08445	0.086306	0.0874219	0.0874	0.0872547	0.0867123	0.0868901	0.0874985	0.0886564	0.0893309	0.0891114	0.0886876	0.0894053	0.090441	0.0915286	0.0924774	0.0936567	0.0944974	0.0945175	0.094644	0.0950526	0.0966601	0.0981412	0.0982878	0.0978483	0.0989087	0.0998418	0.101261	0.103456	0.104234	0.10446	0.104921	0.105129	0.105535	0.106788	0.106951
Peganum_nigellastrum.9	0.0920393	0.0918324	0.0905668	0.0901362	0.0911027	0.0909479	0.0905476	0.091461	0.0918638	0.0916511	0.0913757	0.0911203	0.0922533	0.0925723	0.0918345	0.092631	0.0932981	0.093105	0.0937191	0.0951291	0.0962224	0.096176	0.095678	0.0956113	0.095894	0.0971787	0.0983928	0.0990334	0.0990779	0.0996211	0.100549	0.100388	0.100163	0.100762	0.10178	0.10356	0.104923	0.105371	0.105752	0.106708	0.106928	0.107214	0.108032	0.109503	0.110684	0.110313	0.109872	0.11112	0.112707
Peganum_nigellastrum.10	0.0555188	0.0543747	0.0547643	0.0556309	0.0567652	0.0562773	0.0558644	0.0564318	0.0555098	0.0554625	0.0559224	0.0550029	0.0552328	0.0570311	0.0569634	0.0573825	0.0574861	0.0580155	0.058002	0.0590996	0.0596889	0.0584752	0.057517	0.0584647	0.0593615	0.0592461	0.0595412	0.0601417	0.0602568	0.0603578	0.0599052	0.0600569	0.0607925	0.0615642	0.0629233	0.0646971	0.0647058	0.0635173	0.0637714	0.065226	0.065809	0.0663254	0.0670254	0.0681944	0.0694281	0.0699662	0.0700921	0.0704797	0.0707357
Peganum_nigellastrum.11	0.116732	0.117287	0.116285	0.11378	0.111914	0.112594	0.114325	0.116018	0.116839	0.114975	0.114106	0.11526	0.116145	0.117039	0.116308	0.116001	0.116906	0.118699	0.119444	0.118678	0.117888	0.118853	0.119183	0.118703	0.119003	0.119328	0.11937	0.119167	0.118946	0.119664	0.120589	0.121122	0.121386	0.121965	0.122785	0.123045	0.123405	0.124541	0.12541	0.126421	0.127941	0.128842	0.128376	0.129217	0.130164	0.130461	0.131504	0.132196	0.131995
Peganum_nigellastrum.12	0.146221	0.146247	0.146184	0.145678	0.14425	0.142897	0.142762	0.144982	0.146032	0.146375	0.146756	0.14703	0.147059	0.148646	0.149586	0.148889	0.148071	0.148474	0.150387	0.151667	0.151586	0.151325	0.151643	0.153574	0.154062	0.15414	0.154554	0.155241	0.156005	0.156093	0.156268	0.15727	0.158277	0.159163	0.159097	0.159271	0.160815	0.162357	0.163443	0.164216	0.165908	0.167101	0.167937	0.17045	0.172853	0.17381	0.17503	0.175904	0.176445
Peganum_nigellastrum.13	0.123276	0.123176	0.12236	0.121668	0.121508	0.121267	0.120808	0.121042	0.122073	0.122554	0.121692	0.121059	0.121895	0.123	0.123614	0.124006	0.124263	0.124643	0.125253	0.125685	0.125841	0.12598	0.126288	0.126709	0.126897	0.127161	0.127908	0.128577	0.128817	0.128932	0.129234	0.12968	0.129898	0.130298	0.13134	0.132129	0.132275	0.132409	0.132944	0.134216	0.135793	0.136934	0.13808	0.139362	0.140318	0.141278	0.142264	0.14273	0.142858
Peganum_nigellastrum.14	0.135991	0.136154	0.136751	0.137112	0.136882	0.137137	0.138053	0.139155	0.140456	0.141822	0.142897	0.143573	0.143913	0.144192	0.144885	0.146051	0.147274	0.148311	0.149332	0.150324	0.151445	0.152887	0.154304	0.15539	0.155869	0.156117	0.157184	0.158686	0.159653	0.160538	0.161868	0.163023	0.163568	0.16419	0.165443	0.166891	0.167993	0.168832	0.16998	0.171669	0.173379	0.174783	0.176168	0.1776	0.178998	0.180271	0.181076	0.181652	0.182564
Peganum_nigellastrum.15	0.12173	0.120659	0.119994	0.120777	0.122553	0.123522	0.123449	0.122998	0.122481	0.122275	0.122651	0.123701	0.125104	0.126068	0.126119	0.125647	0.125654	0.126793	0.128326	0.129194	0.129849	0.130807	0.131497	0.131797	0.132076	0.132398	0.13293	0.133934	0.135279	0.136414	0.136881	0.136997	0.137629	0.138812	0.139845	0.140786	0.141868	0.142943	0.144442	0.146473	0.148336	0.149669	0.150624	0.151498	0.152351	0.153039	0.153825	0.154866	0.155711
Peganum_nigellastrum.16	0.1085	0.1077	0.106949	0.10668	0.107226	0.107984	0.107997	0.107633	0.1078	0.107991	0.107548	0.107319	0.107906	0.108822	0.109812	0.110548	0.110489	0.109965	0.109796	0.110158	0.110664	0.111137	0.111462	0.111475	0.111488	0.111879	0.11246	0.112866	0.113196	0.113532	0.113767	0.114152	0.114895	0.115733	0.116112	0.115871	0.115735	0.116291	0.117242	0.117845	0.117795	0.117799	0.118611	0.119775	0.120251	0.119907	0.119593	0.11994	0.120992
Peganum_nigellastrum.17	0.0787432	0.0781099	0.0781953	0.0786756	0.0788735	0.0787997	0.0788747	0.0789152	0.0787854	0.0787345	0.0786213	0.0785108	0.0790627	0.0800219	0.0805657	0.080705	0.0806273	0.0804427	0.0805613	0.0812049	0.0818789	0.0817729	0.0815044	0.0819274	0.0821592	0.0819999	0.0820915	0.0822055	0.0822353	0.0826057	0.0831345	0.0832048	0.0831621	0.083708	0.0846872	0.0852265	0.0848608	0.0841099	0.0838538	0.0843578	0.0850883	0.0857875	0.0866688	0.0876262	0.0883783	0.089012	0.0896416	0.0899145	0.0897529
Peganum_nigellastrum.18	0.11746	0.116793	0.116635	0.117373	0.117699	0.116787	0.116757	0.118258	0.11906	0.118738	0.118574	0.118811	0.118958	0.118952	0.119541	0.121035	0.122417	0.122968	0.1234	0.124191	0.124896	0.125177	0.125542	0.126332	0.126694	0.126628	0.12688	0.127202	0.127512	0.128374	0.12966	0.130655	0.131118	0.131373	0.131915	0.132913	0.1341	0.134977	0.135374	0.135812	0.137007	0.138761	0.140233	0.141316	0.142384	0.14361	0.144827	0.145683	0.14614
Peganum_nigellastrum.19	0.083902	0.0829182	0.0829327	0.0836656	0.0841438	0.0842344	0.084083	0.0839568	0.0842258	0.0843739	0.0841301	0.0843358	0.0849026	0.085052	0.0850076	0.0852169	0.0856729	0.0859295	0.0857685	0.0858003	0.0864386	0.0871522	0.0872559	0.0866971	0.086107	0.0861102	0.0862993	0.0860898	0.0859379	0.0863216	0.0868215	0.0870047	0.0871698	0.0876626	0.0882539	0.0882303	0.0875975	0.0874284	0.088054	0.0889026	0.0897877	0.0907933	0.0915447	0.0917043	0.0917502	0.0918432	0.0918324	0.0921385	0.0925515
Peganum_nigellastrum.20	0.161683	0.162912	0.164395	0.165313	0.165217	0.16463	0.164607	0.165326	0.16621	0.167203	0.168389	0.169279	0.169487	0.169199	0.168862	0.168961	0.169828	0.170996	0.171599	0.171683	0.171896	0.172279	0.17279	0.173743	0.174904	0.175307	0.175302	0.175976	0.176768	0.177249	0.177708	0.177924	0.17809	0.178728	0.179698	0.180599	0.181668	0.182998	0.18394	0.184433	0.184866	0.18514	0.185205	0.185584	0.186511	0.187351	0.187968	0.188914	0.190352
[truncated: 1,676 more columns]

## Sheet: Morphology_characterCodings
	Polar.axis	Equatorial.axis	P/E	Equatorial.diameter	Apocolpium.distance.max	Apocolpium.distance.min	PAI	Colpus.length	Colpus.width	Porus.length	Porus.width	Costa.thickness	Sexine.equatorial.view	Nexine.equatorial.view	Exine.equatorial.view	Exine.polar.area.equatorial.view	Sexine.polar.view	Nexine.polar.view	Exine.polar.view	Exine.index	Sculpture	Punctae	Striae	Pattern
Nitraria_billardierei.1	51	30	1.7	28.5	8	5.5	0.280702	45	2	8	10	2	1	1.5	2.5	3	NA	NA	3.8	0.133333	Striate	0	Tight	1
Nitraria_billardierei.2	53	33	1.60606	32	12	6	0.375	44	1	7	9	2.2	1	1.8	2.8	3.8	NA	NA	3.5	0.109375	Striate	0	Tight	1
Nitraria_billardierei.3	51	33	1.54546	29	7	5	0.241379	44	1	7	8.5	3	2	2	4	3.2	NA	NA	3	0.103448	Striate	0	Tight	1
Nitraria_billardierei.4	45.8	29	1.57931	27.8	8	5	0.28777	41	1	4	5	2.5	1.5	1.8	3.3	3.5	NA	NA	3.5	0.125899	Striate	0	Tight	1
Nitraria_billardierei.5	54	32.8	1.64634	NA	NA	NA	NA	44	2	7	12	2	1.5	1.8	3.3	3	NA	NA	NA	NA	Striate	0	Tight	1
Nitraria_billardierei.6	52	33.5	1.55224	NA	NA	NA	NA	44	1.5	9	11	2.2	1.5	1.8	3.3	4	NA	NA	NA	NA	Striate	0	Tight	1
Nitraria_billardierei.7	52	30.2	1.72185	NA	NA	NA	NA	47	1	6	12	2	1.5	1.8	3.3	3.8	NA	NA	NA	NA	Striate	0	Tight	1
Nitraria_billardierei.8	51	31.1	1.63987	NA	NA	NA	NA	43	2	7	11	2	1	1.5	2.5	3.5	NA	NA	NA	NA	Striate	0	Tight	1
Nitraria_billardierei.9	50.8	32.5	1.56308	NA	NA	NA	NA	44	2	2.5	6	3	1.2	1.8	3	3.5	NA	NA	NA	NA	Striate	0	Tight	1
Nitraria_billardierei.10	49.8	29	1.71724	NA	NA	NA	NA	41	1.5	6	9	2	1.2	2	3.2	4	NA	NA	NA	NA	Striate	0	Tight	1
Nitraria_billardierei.11	51	29	1.75862	NA	NA	NA	NA	43	1.5	7	10	2.5	1.5	1.8	3.3	3	NA	NA	NA	NA	Striate	0	Tight	1
Nitraria_billardierei.12	51	31	1.64516	NA	NA	NA	NA	41	4	6.5	11	2	1.5	1.5	3	3.8	NA	NA	NA	NA	Striate	0	Tight	1
Nitraria_billardierei.13	51	30.5	1.67213	NA	NA	NA	NA	42	1.5	5	6	2.5	1	1.5	2.5	3.8	NA	NA	NA	NA	Striate	0	Tight	1
Nitraria_billardierei.14	45.8	28	1.63571	NA	NA	NA	NA	40	2	3.5	6	2	1.2	1.8	3	4.5	NA	NA	NA	NA	Striate	0	Tight	1
Nitraria_billardierei.15	51	29.5	1.72881	NA	NA	NA	NA	41	3	7	9	2	1	2	3	4	NA	NA	NA	NA	Striate	0	Tight	1
Nitraria_billardierei.16	52	29	1.7931	NA	NA	NA	NA	45	2.5	7	9	1.8	1.2	2	3.2	4	NA	NA	NA	NA	Striate	0	Tight	1
Nitraria_billardierei.17	47	29	1.62069	NA	NA	NA	NA	41	2	5	6	2	1	1.8	2.8	3.5	NA	NA	NA	NA	Striate	0	Tight	1
Nitraria_billardierei.18	51	29	1.75862	NA	NA	NA	NA	41	1.5	7	7	2	1.5	1.8	3.3	4	NA	NA	NA	NA	Striate	0	Tight	1
Nitraria_billardierei.19	53	31	1.70968	NA	NA	NA	NA	45	1	7	9	2	1	1.8	2.8	4	NA	NA	NA	NA	Striate	0	Tight	1
Nitraria_billardierei.20	50.5	36.5	1.38356	NA	NA	NA	NA	44	1	6.5	8	2.5	1	2	3	4	NA	NA	NA	NA	Striate	0	Tight	1
Nitraria_retusa.1	39	29	1.34483	30	8.5	6	0.283333	28	6	4	11	2.5	1	2	3	2.8	NA	NA	4	0.143333	Striate	1	Loose	2
Nitraria_retusa.2	39	30	1.3	28	7.5	6	0.267857	30.5	3	3	9.5	2	0.8	2.5	3.3	2	NA	NA	3.8	0.135714	Striate	1	Loose	2
Nitraria_retusa.3	40	29	1.37931	29	10	7	0.344828	35	4.5	4.8	10	2.5	1	2	3	2.8	NA	NA	3.8	0.0965517	Striate	1	Loose	2
Nitraria_retusa.4	36	27	1.33333	29.5	8	7	0.271186	31	5	4.5	9	2	1	2	3	2	NA	NA	4.2	0.101695	Striate	1	Loose	2
Nitraria_retusa.5	36.5	27	1.35185	25.5	6	4	0.290909	34	4	3.5	8	2	1	2	3	2.8	NA	NA	4.2	0.0909091	Striate	1	Loose	2
Nitraria_retusa.6	38.8	27	1.43704	27.5	8	7	0.285714	33.5	3	2.5	7.5	2	1.5	2	3.5	2.5	NA	NA	3.8	0.0892857	Striate	1	Loose	2
Nitraria_retusa.7	39	28.5	1.36842	28	8	7.5	0.275862	34	4	2.5	9	2.8	1	2.5	3.5	3	NA	NA	3.5	0.106897	Striate	1	Loose	2
Nitraria_retusa.8	39.5	27.5	1.43636	29	8	5.5	0.359712	34	3	3	10	2.5	1	2.5	3.5	2.8	NA	NA	4	0.118705	Striate	1	Loose	2
Nitraria_retusa.9	40.5	28	1.44643	27.8	10	8.5	0.269231	34	4.5	4.5	10	2.8	1	2	3	2.5	NA	NA	4	0.107692	Striate	1	Loose	2
Nitraria_retusa.10	37	28.8	1.28472	26	7	5.5	0.301887	30.5	5	4.5	11.5	2.5	1.5	2	3.5	2	NA	NA	4	0.10566	Striate	1	Loose	2
Nitraria_retusa.11	36	27	1.33333	26.5	8	6	0.235294	31	3.5	3	8	2.5	1	2	3	2.5	NA	NA	3.7	0.141176	Striate	1	Loose	2
Nitraria_retusa.12	39	28	1.39286	25.5	6	5	0.309091	34	4	4.5	11	2.5	1	2	3	2	NA	NA	4.1	0.127273	Striate	1	Loose	2
Nitraria_retusa.13	39	26.8	1.45522	27.5	8.5	6	0.309091	35	3	3.8	9	2.5	1.2	2.2	3.4	2.5	NA	NA	4.1	0.130909	Striate	1	Loose	2
Nitraria_retusa.14	36.5	30	1.21667	29	6	6	0.206897	32	4.5	3	10.5	2	1	2.5	3.5	2.8	NA	NA	3.8	0.113793	Striate	1	Loose	2
Nitraria_retusa.15	42	29.5	1.42373	27.8	6	5.5	0.215827	37	4.5	3	12	2.5	1.5	2	3.5	2	NA	NA	5	0.100719	Striate	1	Loose	2
Nitraria_retusa.16	38.5	30	1.28333	26	6	5.5	0.230769	32	3.5	2.5	7	3	1.2	2.5	3.7	2	NA	NA	3.8	0.119231	Striate	1	Loose	2
Nitraria_retusa.17	39.5	28	1.41071	28.5	7	5	0.245614	35	4	4	12	2.5	1	2	3	2.5	NA	NA	3.3	0.115789	Striate	1	Loose	2
Nitraria_retusa.18	41	27.5	1.49091	30	6.5	5	0.216667	34	3.5	4	9	2	1.5	2	3.5	2.5	NA	NA	4	0.11	Striate	1	Loose	2
Nitraria_retusa.19	41.5	29	1.43103	30	7	6	0.233333	36	3	4.5	11	2.5	1.2	2	3.2	2.5	NA	NA	3.8	0.0933333	Striate	1	Loose	2
Nitraria_retusa.20	41	29.5	1.38983	28.5	7	7.5	0.245614	37	4.5	3.5	11	3	1	2	3	2.8	NA	NA	3.8	0.108772	Striate	1	Loose	2
Nitraria_schoberi.1	42	32.5	1.29231	32.5	11	7.5	0.338462	35	6	4	7	4	1	2	3	4	NA	NA	4.3	0.123077	Striate	0	Tight	1
Nitraria_schoberi.2	49	35	1.4	36	10	10	0.277778	41	5	5	8	3	1.5	1.8	3.3	4	NA	NA	3.8	0.105556	Striate	0	Tight	1
Nitraria_schoberi.3	48	36	1.33333	35	8.5	6.5	0.242857	40	8	5	14	3	1.5	2	3.5	3.5	NA	NA	2.8	0.108571	Striate	0	Tight	1
Nitraria_schoberi.4	42.5	34	1.25	34.8	7	7	0.201149	35	4	2	7	4	1.5	1.8	3.3	3.5	NA	NA	3	0.12069	Striate	0	Tight	1
Nitraria_schoberi.5	44	38	1.15789	32	9	6.5	0.285714	37	4	2.5	7	3.5	1.8	1.8	3.6	3.5	NA	NA	2.5	0.12	Striate	0	Tight	1
Nitraria_schoberi.6	45	30	1.5	35	10	6	0.322581	37.5	4	1	6	4	1	2.5	3.5	4	NA	NA	2.5	0.122581	Striate	0	Tight	1
Nitraria_schoberi.7	49	38	1.28947	31	10	10	0.25974	42	10	7	17	4	1	2.5	3.5	3	NA	NA	3.1	0.0909091	Striate	0	Tight	1
Nitraria_schoberi.8	49	38	1.28947	38.5	10	7	0.290323	43	7	6	15	3.8	1.2	2.2	3.4	4	NA	NA	3.3	0.129032	Striate	0	Tight	1
Nitraria_schoberi.9	45	34	1.32353	31	9	9	0.307692	48	4	2	14	4	1.2	2.5	3.7	4	NA	NA	2.8	0.123077	Striate	0	Tight	1
Nitraria_schoberi.10	46.8	34	1.37647	32.5	10	10	0.33046	38	6	6	8.5	3.8	1.5	2.5	4	3	NA	NA	2.8	0.114943	Striate	0	Tight	1
Nitraria_schoberi.11	59	37.8	1.56085	34.8	11.5	9	0.306667	43	5	4	9	4	1	3	4	4	NA	NA	3.6	0.0986667	Striate	0	Tight	1
Nitraria_schoberi.12	44	32	1.375	37.5	11.5	8	0.369128	36	3	1	9	4.5	1.2	2.5	3.7	3.5	NA	NA	3.5	0.137584	Striate	0	Tight	1
Nitraria_schoberi.13	46.5	37	1.25676	29.8	11	11	0.369128	40	7.5	5	9	4	1.2	2.5	3.7	4	NA	NA	3.6	0.137584	Striate	0	Tight	1
Nitraria_schoberi.14	44.3	32	1.38437	32	10	10	0.3125	35	3	2	5	3.5	1.2	2.5	3.7	3.5	NA	NA	3.3	0.11875	Striate	0	Tight	1
Nitraria_schoberi.15	45	32.5	1.38461	34	11	8.5	0.323529	39	3.5	2	8	4	1	3	4	4.5	NA	NA	2.8	0.147059	Striate	0	Tight	1
Nitraria_schoberi.16	45	39	1.15385	32	11	7	0.34375	40	9.5	8	16	4	1.5	2.8	4.3	3.5	NA	NA	3.1	0.11875	Striate	0	Tight	1
Nitraria_schoberi.17	43.5	33	1.31818	31	8	8	0.258065	36	3.5	1.5	7.5	4	1.5	2	3.5	3.8	NA	NA	3.3	0.106452	Striate	0	Tight	1
Nitraria_schoberi.18	47	33.5	1.40298	29	8	8	0.275862	40	4	2.5	6	3.5	1.5	3	4.5	3.5	NA	NA	3.3	0.137931	Striate	0	Tight	1
Nitraria_schoberi.19	43.2	31.5	1.37143	34	8.5	8	0.25	36.5	3	1.5	9	3	1.5	2	3.5	3.8	NA	NA	2.8	0.111765	Striate	0	Tight	1
Nitraria_schoberi.20	42	36.5	1.15068	32.5	10	8	0.307692	40	5.5	3.5	13	3.5	1.5	2.8	4.3	4	NA	NA	3.1	0.116923	Striate	0	Tight	1
Nitraria_sibirica.1	38.5	28	1.375	30	4	3.5	0.133333	35	4	4.5	8	2.2	1	2	3	2.5	NA	NA	3.1	0.0933333	Striate	0	Loose	3
Nitraria_sibirica.2	39	27	1.44444	28.5	6	5	0.210526	34.5	3.5	5	7	2	1.2	1.8	3	2.8	NA	NA	3.1	0.105263	Striate	0	Loose	3
Nitraria_sibirica.3	41.8	28	1.49286	29	5	4	0.172414	36	3.5	4	10	1.8	1	2	3	2.8	NA	NA	3.6	0.103448	Striate	0	Loose	3
Nitraria_sibirica.4	41.5	29	1.43103	29.5	6.5	4	0.220339	37.5	5.5	5	12	1.5	1	2	3	2.5	NA	NA	2.8	0.111864	Striate	0	Loose	3
Nitraria_sibirica.5	40.5	27	1.5	28	4	4	0.142857	36	3	5	10	2	0.8	2	2.8	2.5	NA	NA	2.8	0.107143	Striate	0	Loose	3
Nitraria_sibirica.6	41.5	28	1.48214	29	5	4	0.172414	37	5	3	6	1.8	1.2	1.5	2.7	2.5	NA	NA	3.3	0.0862069	Striate	0	Loose	3
Nitraria_sibirica.7	38.5	26	1.48077	29	4	3	0.137931	34	4	4	11	1.5	1.2	1.8	3	2	NA	NA	3.6	0.103448	Striate	0	Loose	3
Nitraria_sibirica.8	41	28.5	1.4386	28	6	4.5	0.214286	36	3.5	4.5	10	2	1.2	2	3.2	2.5	NA	NA	3.6	0.1	Striate	0	Loose	3
Nitraria_sibirica.9	41.5	28	1.48214	30	5	5	0.166667	37	5	5	10	1.8	1	1.5	1.5	2.8	NA	NA	2.8	0.0833333	Striate	0	Loose	3
Nitraria_sibirica.10	36	27	1.33333	28	4	4	0.142857	33	3	4	6.5	2	1	1.5	2.5	2.8	NA	NA	2.8	0.1	Striate	0	Loose	3
Nitraria_sibirica.11	41	29	1.41379	30.5	5	4	0.163934	36.5	4	5	8	2	1.5	1.8	3.3	3.5	NA	NA	3.3	0.0983607	Striate	0	Loose	3
Nitraria_sibirica.12	38.5	28	1.375	27.8	5	4	0.179856	33.5	3.5	4	8	2	0.8	2	2.8	3	NA	NA	3.1	0.100719	Striate	0	Loose	3
Nitraria_sibirica.13	40.5	29	1.39655	NA	NA	NA	NA	36	3	6	11	1.8	1	2	3	3	NA	NA	3.1	NA	Striate	0	Loose	3
Nitraria_sibirica.14	41	28	1.46429	NA	NA	NA	NA	36	2.8	4.5	10	2	1	1.8	2.8	2.8	NA	NA	3.3	NA	Striate	0	Loose	3
Nitraria_sibirica.15	39	25.5	1.52941	NA	NA	NA	NA	34	3	3	9	1.8	1	1.8	2.8	2.5	NA	NA	2.8	NA	Striate	0	Loose	3
Nitraria_sibirica.16	41	29.8	1.37584	NA	NA	NA	NA	35	5	5	11	1.8	1	1.5	2.5	2.5	NA	NA	3	NA	Striate	0	Loose	3
Nitraria_sibirica.17	38	27.5	1.38182	NA	NA	NA	NA	33	4	5	9	1.8	1	1.8	2.8	2.8	NA	NA	3	NA	Striate	0	Loose	3
Nitraria_sibirica.18	38.5	27.5	1.4	NA	NA	NA	NA	34	4	6	8	2	1	1.8	2.8	3	NA	NA	3	NA	Striate	0	Loose	3
Nitraria_sibirica.19	40	24	1.66667	NA	NA	NA	NA	35	5	4.5	10	2	1.2	1.8	3	2.5	NA	NA	3	NA	Striate	0	Loose	3
Nitraria_sibirica.20	39.5	25.8	1.53101	NA	NA	NA	NA	34	4	4	9	2	1	1.8	2.8	2.5	NA	NA	3	NA	Striate	0	Loose	3
Nitraria_sphaerocarpa.1	36	25.5	1.41176	23	5	4	0.217391	30.5	3	3	5.5	2	1.5	2.5	4	2.5	NA	NA	3.7	0.16087	Striate	1	Tight	2
Nitraria_sphaerocarpa.2	39	26	1.5	26	5	4.5	0.192308	36	2.5	3	5	3	1.2	2.5	3.7	2.8	NA	NA	3.5	0.134615	Striate	1	Tight	2
Nitraria_sphaerocarpa.3	35.5	24.5	1.44898	25.5	6	4.5	0.235294	30	3	2.5	5	2.5	1.8	2	3.8	3	NA	NA	3.5	0.137255	Striate	1	Tight	2
Nitraria_sphaerocarpa.4	36	25	1.44	25	5.5	4.5	0.22	31	2.5	2.5	6	2.8	1.5	2	3.5	2.8	NA	NA	3.8	0.152	Striate	1	Tight	2
Nitraria_sphaerocarpa.5	35.5	25.5	1.39216	25.5	5.5	5	0.193798	32	2	2	5	2.5	1.5	2.5	4	2.8	NA	NA	3.5	0.135659	Striate	1	Tight	2
Nitraria_sphaerocarpa.6	36	24.5	1.46939	25.8	5	4	0.22449	31	2	2	6	2.5	2	2	4	3	NA	NA	3.5	0.142857	Striate	1	Tight	2
Nitraria_sphaerocarpa.7	37.5	25.5	1.47059	24.5	5.5	5	0.22449	32	4	1.8	5.5	2.8	1.5	2.5	4	3	NA	NA	4.1	0.167347	Striate	1	Tight	2
Nitraria_sphaerocarpa.8	37.5	28	1.33929	24.5	5.5	4	0.2	31	4	1	8	2.8	1.5	1.8	3.3	3.5	NA	NA	3.8	0.168889	Striate	1	Tight	2
Nitraria_sphaerocarpa.9	35.5	25.5	1.39216	22.5	4.5	4	0.166667	29	3.5	2.8	6.5	2.5	2	2	4	3	NA	NA	3.8	0.158333	Striate	1	Tight	2
Nitraria_sphaerocarpa.10	37.8	26	1.45385	24	4	3.5	0.18	31	4	1	7	2.8	1.5	2	3.5	3.8	NA	NA	3.8	0.152	Striate	1	Tight	2
Nitraria_sphaerocarpa.11	38.5	25.5	1.5098	25	4.5	5	0.2	31.5	3	2	5	2.5	1.5	1.8	3.3	2.8	NA	NA	4	0.16	Striate	1	Tight	2
Nitraria_sphaerocarpa.12	35	24.8	1.41129	25	5	4	0.217391	28.5	3	2	5	2.5	1.5	2	3.5	3	NA	NA	3.7	0.16087	Striate	1	Tight	2
Nitraria_sphaerocarpa.13	35	26	1.34615	23	5	4.5	0.217391	31	3	2	5	2.5	2	2	4	2.8	NA	NA	4.2	0.182609	Striate	1	Tight	2
Nitraria_sphaerocarpa.14	37.5	24	1.5625	26.5	5.5	5	0.207547	32	2	2	4	2	1.5	2	3.5	3	NA	NA	4	0.150943	Striate	1	Tight	2
Nitraria_sphaerocarpa.15	38.5	24.5	1.57143	24.8	4.5	4.5	0.181452	33	2.5	3	6	2.5	1.5	2.2	3.7	3.5	NA	NA	3.8	0.153226	Striate	1	Tight	2
Nitraria_sphaerocarpa.16	35.5	25	1.42	25.5	6	4	0.235294	28	3	2	6	2.5	1.5	2.5	4	3.5	NA	NA	3.8	0.14902	Striate	1	Tight	2
Nitraria_sphaerocarpa.17	34.5	26	1.32692	24	5	4	0.208333	29	2.5	1.5	6	2.5	1.8	2.2	4	3	NA	NA	3.7	0.154167	Striate	1	Tight	2
Nitraria_sphaerocarpa.18	37	28	1.32143	24.5	5	5	0.204082	33	4	2	8	2.8	1.5	1.5	3	3.5	NA	NA	3.2	0.130612	Striate	1	Tight	2
Nitraria_sphaerocarpa.19	35.5	26	1.36539	24	5	4.5	0.208333	30	3	2	7	2	1.5	1.8	3.3	3	NA	NA	4	0.166667	Striate	1	Tight	2
Nitraria_sphaerocarpa.20	40	28	1.42857	28.5	7	6	0.245614	35	1.5	4	6.5	2.5	1.5	2.5	4	3.5	NA	NA	4.3	0.150877	Striate	1	Tight	2
Nitraria_tangutorum.1	40	26.5	1.50943	27	7	6	0.259259	35.5	2.5	5	10	2.5	1.5	2	3.5	2.5	NA	NA	2.8	0.114815	Striate	0	Tight	1
Nitraria_tangutorum.2	45	28	1.60714	26.5	7	6	0.264151	40	3	5	9	2.8	1	2	3	2.5	NA	NA	3	0.116981	Striate	0	Tight	1
Nitraria_tangutorum.3	44	28	1.57143	28.5	6	5	0.210526	43.5	3.5	5.5	11	2.5	1	2	3	2.8	NA	NA	3	0.126316	Striate	0	Tight	1
Nitraria_tangutorum.4	40.5	27	1.5	28	7	5	0.25	36.5	3	3	7	2.8	1	1.8	2.8	2.8	NA	NA	3.3	0.1	Striate	0	Tight	1
Nitraria_tangutorum.5	41.5	28	1.48214	26.5	7	5	0.25	35	3.5	4.5	10	3	1.2	2	3.2	3	NA	NA	3	0.1	Striate	0	Tight	1
Nitraria_tangutorum.6	44.5	28.5	1.5614	28	7	6	0.237288	40	4.5	5	10	2.5	1.2	2	3.2	2.8	NA	NA	2.5	0.111864	Striate	0	Tight	1
Nitraria_tangutorum.7	45.5	29	1.56897	29.5	7	7	0.226415	40	4.5	5	11	2.5	1	1.5	2.5	3	NA	NA	3	0.135849	Striate	0	Tight	1
Nitraria_tangutorum.8	39	24.5	1.59184	26.5	6	6	0.226415	34	2.5	3.5	5	3	1	1.5	2.5	2.5	NA	NA	2.8	0.135849	Striate	0	Tight	1
Nitraria_tangutorum.9	42.5	27.5	1.54546	26.5	6	5.5	0.269231	36.5	3	5	12	3	1	2	3	2.5	NA	NA	2.5	0.107692	Striate	0	Tight	1
Nitraria_tangutorum.10	43	28	1.53571	26	7	6	0.204082	38	5	7	13	2.5	1	2	3	2.5	NA	NA	2.8	0.114286	Striate	0	Tight	1
Nitraria_tangutorum.11	42	28.5	1.47368	24.5	5	3	0.241379	36	4	5	10	2	1	2	3	2.8	NA	NA	3	0.113793	Striate	0	Tight	1
Nitraria_tangutorum.12	41.5	25.5	1.62745	29	7	5	0.209677	37	2.5	3.5	5	2.5	1	1.8	2.8	2.5	NA	NA	2.8	0.1	Striate	0	Tight	1
Nitraria_tangutorum.13	40	27	1.48148	31	6.5	6	0.209677	36	3	5.5	8	2	1	2.5	3.5	2.5	NA	NA	NA	0.1	Striate	0	Tight	1
Nitraria_tangutorum.14	44	28.8	1.52778	29.5	6	5	0.20339	40	4	5	11	2.5	1	2	3	3	NA	NA	NA	0.111864	Striate	0	Tight	1
Nitraria_tangutorum.15	42	27.5	1.52727	28	8	5.8	0.285714	38	5	5	11	2.8	1.2	2	3.2	2.5	NA	NA	NA	0.1	Striate	0	Tight	1
Nitraria_tangutorum.16	40	24	1.66667	31.5	8	6	0.253968	37	2	3	7	2	1.2	1.8	3	2.8	NA	NA	NA	0.0952381	Striate	0	Tight	1
Nitraria_tangutorum.17	40.5	27	1.5	29	5	3	0.172414	36	3.5	6	9	2.5	1	2	3	2.8	NA	NA	NA	0.103448	Striate	0	Tight	1
Nitraria_tangutorum.18	41.5	26	1.59615	25	6	5	0.24	36.5	3	5	7	3	0.8	1.8	2.6	2.5	NA	NA	NA	0.12	Striate	0	Tight	1
Nitraria_tangutorum.19	43	27.5	1.56364	31	8	6	0.258065	38	3	5.5	10	2.8	1	2.5	3.5	2.5	NA	NA	NA	0.0967742	Striate	0	Tight	1
Nitraria_tangutorum.20	43.5	28	1.55357	25.5	6	5	0.235294	34	3.5	4	8	2.8	1	1.8	2.8	3	NA	NA	NA	0.117647	Striate	0	Tight	1
Peganum_harmala.1	25	26	0.961538	26	5	5	0.192308	21	7	9	7	NA	1	1	2	1.5	0.5	1	1.5	0.0576923	Microreticulate	NA	NA	NA
Peganum_harmala.2	23	26	0.884615	25	5	5	0.2	19.5	7	8	7	NA	1	1	2	1.8	0.8	0.8	1.6	0.064	Microreticulate	NA	NA	NA
Peganum_harmala.3	24	28	0.857143	24	4	4	0.166667	18	8	9	8	NA	1	1	2	2	1	1	2	0.0833333	Microreticulate	NA	NA	NA
Peganum_harmala.4	25	27	0.925926	26	5	5	0.192308	20	7	10.5	7	NA	0.8	0.8	1.6	2	0.8	1	1.8	0.0692308	Microreticulate	NA	NA	NA
Peganum_harmala.5	22	24	0.916667	26.5	5	5	0.16	17	6	8	6	NA	1	1	2	1.8	1	1	2	0.08	Microreticulate	NA	NA	NA
Peganum_harmala.6	24	27	0.888889	25	4	4	0.163265	19	7	9.5	7	NA	1	0.8	1.8	2	0.8	0.8	1.6	0.0653061	Microreticulate	NA	NA	NA
Peganum_harmala.7	25	26	0.961538	24.5	4	4	0.22	22	6	9	6	NA	1	1	2	1.8	1	0.8	1.8	0.072	Microreticulate	NA	NA	NA
Peganum_harmala.8	25.5	29	0.87931	25	5.5	4	0.267176	21	7.5	11	7.5	NA	1	1	2	1.8	1	0.8	1.8	0.0687023	Microreticulate	NA	NA	NA
Peganum_harmala.9	24	26.5	0.90566	26.2	7	5	0.212766	19	6.5	7.5	6.5	NA	1	0.8	1.8	2	1	1	2	0.0851064	Microreticulate	NA	NA	NA
Peganum_harmala.10	25	28	0.892857	23.5	5	5	0.162455	20.5	8	9	8	NA	1	1	2	1.8	1	0.8	1.8	0.0649819	Microreticulate	NA	NA	NA
Peganum_harmala.11	24	28	0.857143	27.7	4.5	4	0.22	19	9	10	9	NA	0.8	0.8	1.6	2	1	0.8	1.8	0.072	Microreticulate	NA	NA	NA
Peganum_harmala.12	26.5	28.5	0.929825	25	5.5	5.5	0.2	21.5	9	11	9	NA	1	0.8	1.8	1.8	1	1	2	0.08	Microreticulate	NA	NA	NA
Peganum_harmala.13	24.5	27.5	0.890909	25	5	5	0.2	20	9	8	9	NA	1	1	2	1.5	1	1	2	0.08	Microreticulate	NA	NA	NA
Peganum_harmala.14	25	27	0.925926	26.5	4	3	0.150943	22.5	8	8	8	NA	1	1	2	2	1	1	2	0.0754717	Microreticulate	NA	NA	NA
Peganum_harmala.15	23	26.5	0.867925	27	4	3.5	0.148148	18.5	8	9	8	NA	0.8	0.8	1.6	1.8	1	0.8	1.8	0.0666667	Microreticulate	NA	NA	NA
Peganum_harmala.16	25	29	0.862069	27	5	4.5	0.185185	20	9	10	9	NA	1	0.8	1.8	2	1	0.8	1.8	0.0666667	Microreticulate	NA	NA	NA
Peganum_harmala.17	23.8	25.5	0.933333	25	4	4	0.16	21	7	9	7	NA	1	0.8	1.8	1.8	1	0.8	1.8	0.072	Microreticulate	NA	NA	NA
Peganum_harmala.18	25	26	0.961538	26	4	4	0.153846	20	6	7	6	NA	1	1	2	1.8	1	1	2	0.0769231	Microreticulate	NA	NA	NA
Peganum_harmala.19	24.8	28	0.885714	26	4	3.5	0.153846	19	8	8	8	NA	1	0.8	1.8	1.8	0.8	0.8	1.6	0.0615385	Microreticulate	NA	NA	NA
Peganum_harmala.20	24	27	0.888889	26.5	4	4	0.150943	20	7	8	7	NA	1	0.8	1.8	2	1	0.8	1.8	0.0679245	Microreticulate	NA	NA	NA
Peganum_nigellastrum.1	19.5	20.5	0.95122	20.8	4	4	0.192308	16	5	6	5	NA	1	1	2	1.8	1	1	2	0.0961538	Microreticulate	NA	NA	NA
Peganum_nigellastrum.2	19.5	18.5	1.05405	21	3.5	3.5	0.166667	15	3.5	6	3.5	NA	0.8	0.8	1.6	1.8	1	1	2	0.0952381	Microreticulate	NA	NA	NA
Peganum_nigellastrum.3	20.5	20.5	1	19.5	4	4	0.205128	16.5	6.5	8	6.5	NA	0.8	0.8	1.6	1.8	1	1	2	0.102564	Microreticulate	NA	NA	NA
Peganum_nigellastrum.4	20	20.5	0.97561	19	3	3	0.157895	15.5	4	6	4	NA	0.8	0.8	1.6	2	0.8	0.8	1.6	0.0842105	Microreticulate	NA	NA	NA
Peganum_nigellastrum.5	21.5	21.5	1	21	3.5	3	0.15	17	6	6.5	6	NA	1	1	2	2	1	0.8	1.8	0.09	Microreticulate	NA	NA	NA
Peganum_nigellastrum.6	20.5	20.5	1	20	3	3	0.2	16.5	6.5	7.5	6.5	NA	0.8	0.8	1.6	1.8	0.8	0.8	1.6	0.08	Microreticulate	NA	NA	NA
Peganum_nigellastrum.7	21	20.5	1.02439	20	4	3	0.2	18	5	6	5	NA	0.8	0.8	1.6	2	1	1	2	0.1	Microreticulate	NA	NA	NA
Peganum_nigellastrum.8	20.5	19.5	1.05128	20	4	4	0.2	17	4	5	4	NA	1	1	2	2	1	0.8	1.8	0.09	Microreticulate	NA	NA	NA
Peganum_nigellastrum.9	20	18.5	1.08108	20	4	3	0.15	16.5	4	6.5	4	NA	0.8	0.8	1.6	1.8	1	1	2	0.1	Microreticulate	NA	NA	NA
Peganum_nigellastrum.10	20.5	21	0.97619	20	3	3	0.142857	16	5	6	5	NA	1	1	2	2	1	1	2	0.0952381	Microreticulate	NA	NA	NA
Peganum_nigellastrum.11	21	21.5	0.976744	21	3	3	0.15	18	6	7.5	6	NA	0.8	0.8	1.6	2	0.8	0.8	1.6	0.08	Microreticulate	NA	NA	NA
Peganum_nigellastrum.12	20.5	19.5	1.05128	20	3	3	0.153846	17	5	6	6	NA	1	0.8	1.8	1.8	0.8	0.8	1.6	0.0820513	Microreticulate	NA	NA	NA
Peganum_nigellastrum.13	19	21	0.904762	19.5	3	3	0.153846	15.5	4	5	4	NA	1	0.8	1.8	1.8	1	0.8	1.8	0.0923077	Microreticulate	NA	NA	NA
Peganum_nigellastrum.14	21	20	1.05	20	4	4	0.2	17	3	5	3	NA	1	1	2	2	1	0.8	1.8	0.09	Microreticulate	NA	NA	NA
Peganum_nigellastrum.15	20.5	19	1.07895	19.5	3	3	0.153846	17	5	5.5	5	NA	1	0.8	1.8	1.8	1	1	2	0.102564	Microreticulate	NA	NA	NA
Peganum_nigellastrum.16	20.5	20.5	1	20	4.5	4	0.225	16.5	3	6	3	NA	1	1	2	2	0.8	0.8	1.6	0.08	Microreticulate	NA	NA	NA
Peganum_nigellastrum.17	18.5	21	0.880952	20	4	3	0.2	14	5	5	5	NA	1	0.8	1.8	2	1	1	2	0.1	Microreticulate	NA	NA	NA
Peganum_nigellastrum.18	20	21	0.952381	21	4	4	0.190476	16	4	4	4	NA	1	1	2	1.8	1	0.8	1.8	0.0857143	Microreticulate	NA	NA	NA
Peganum_nigellastrum.19	21	20	1.05	20.5	3.5	3	0.170732	17	3.5	6	3.5	NA	1	0.8	1.8	2	1	1	2	0.097561	Microreticulate	NA	NA	NA
Peganum_nigellastrum.20	20.5	20	1.025	21.5	4	4	0.186047	16	5	6	5	NA	1	0.8	1.8	1.8	0.8	0.8	1.6	0.0744186	Microreticulate	NA	NA	NA
